# Supplementary material for: Spirocyclization and Michael addition of 3-benzylidene succinimides: route to spirocyclopentapyrrolidine-tetraones and benzylidene N-arylpyrrolidine-diones
Source: Royal Society of Chemistry journal article supplement (doi:10.1039/d3ob01629c), 2023-01-01
Supplement: d3ob01629c1.pdf [file d3ob01629c1.pdf]

**Spirocyclization and Michael addition of 3-benzylidene succinimides: Route to  
spirocyclopentapyrrolidine-tetraones and benzylidene *N*-arylpyrrolidine-diones**

Pooja Dahiya, Anoop Yadav and Rama Krishna Peddinti\*

*Department of Chemistry, Indian Institute of Technology Roorkee*

*Roorkee-247 667, Uttarakhand, India*

---

**SUPPORTING INFORMATION**

---

**Table of contents**

|                                                                          |         |
|--------------------------------------------------------------------------|---------|
| General information                                                      | S2      |
| NMR studies of compounds <b>3c</b> , <b>5o</b>                           | S2–S9   |
| General procedures                                                       | S9–S10  |
| General procedure for the synthesis of <b>1a–1d</b>                      | S9–S10  |
| General procedure for the synthesis of <b>2a–2f</b>                      | S10     |
| General procedure for the synthesis of <b>4a–4d</b>                      | S10     |
| Characterization data of <b>3a–3r</b> and <b>5a–5r</b>                   | S10–S26 |
| Copies of NMR spectra of <b>3a–3r</b> and <b>5a–5r</b>                   | S27–S68 |
| <sup>1</sup> H NMR data table for characteristic protons of <b>3a–3r</b> | S69     |
| <sup>1</sup> H NMR data table for characteristic protons of <b>5a–5r</b> | S69     |
| The ORTEP plot and crystallographic data for compound <b>3l</b>          | S70     |
| The ORTEP plot and crystallographic data for compound <b>5o</b>          | S71     |

### General information:

Unless otherwise noted, chemicals were purchased from commercial suppliers at the highest purity grade available and were used without further purification. The 2-hydroxy-2-(2-oxo-2-phenylethyl)-1*H*-indene-1,3(2*H*)-diones **1a–1d** and 3-benzylidene succinimides **2a–2f** and (*E*)-4-benzylidene-5-methyl-2-phenyl-2,4-dihydro-3*H*-pyrazol-3-ones **4a–4d** were synthesized by literature methods. Thin layer chromatography was performed on pre-coated 0.25 mm silica gel plates (60F<sub>254</sub>) using UV light as visualizing agent. Silica gel (100–200 mesh) was used for column chromatography. NMR spectra were recorded in CDCl<sub>3</sub> and using TMS as an internal standard on 500 MHz instrument. Chemical shifts ( $\delta$ ) were reported as parts per million (ppm) in  $\delta$  scale downfield from TMS. <sup>1</sup>H NMR spectra were referenced to CDCl<sub>3</sub> (7.26 ppm) and <sup>13</sup>C NMR spectra were referenced to CDCl<sub>3</sub> (77.0 ppm, the middle peak). Coupling constants were expressed in Hz. The following abbreviations were used to explain the multiplicities: s = singlet, d = doublet, t = triplet, q = quartet, dd = doublet of doublets, dt = doublet of triplets, m = multiplet. High-resolution mass spectra (HRMS) were obtained on a Xevo XS QTOF mass spectrometer (ESI-MS).

### NMR studies of compounds **3c** and **5o**:

The structures of spiro compounds **3a–3p** were established by NMR and HRMS spectral analysis. Further to gain a deeper understanding, the structure of the product **3c** was corroborated by 2D NMR such as COSY, NOESY, HMBC, HSQC. From 2D experiments, the stereochemical correlation between H<sub>a</sub>, H<sub>b</sub>, H<sub>c</sub> and H<sub>d</sub> was established. In **3c**, H<sub>a</sub> and H<sub>c</sub> protons appear as doublets at 4.77 and 4.58 ppm while H<sub>b</sub> and H<sub>d</sub> appear as doublet of doublet at 3.96 and 4.56 ppm, respectively. We performed the 2D NMR experiments to know the spatial correlation between protons H<sub>a</sub>, H<sub>b</sub>, H<sub>c</sub>, H<sub>d</sub> from which we found that H<sub>a</sub> and H<sub>b</sub> are in same plane and H<sub>c</sub> and H<sub>d</sub> is in opposite plane w.r.t. H<sub>a</sub>, H<sub>b</sub> protons.

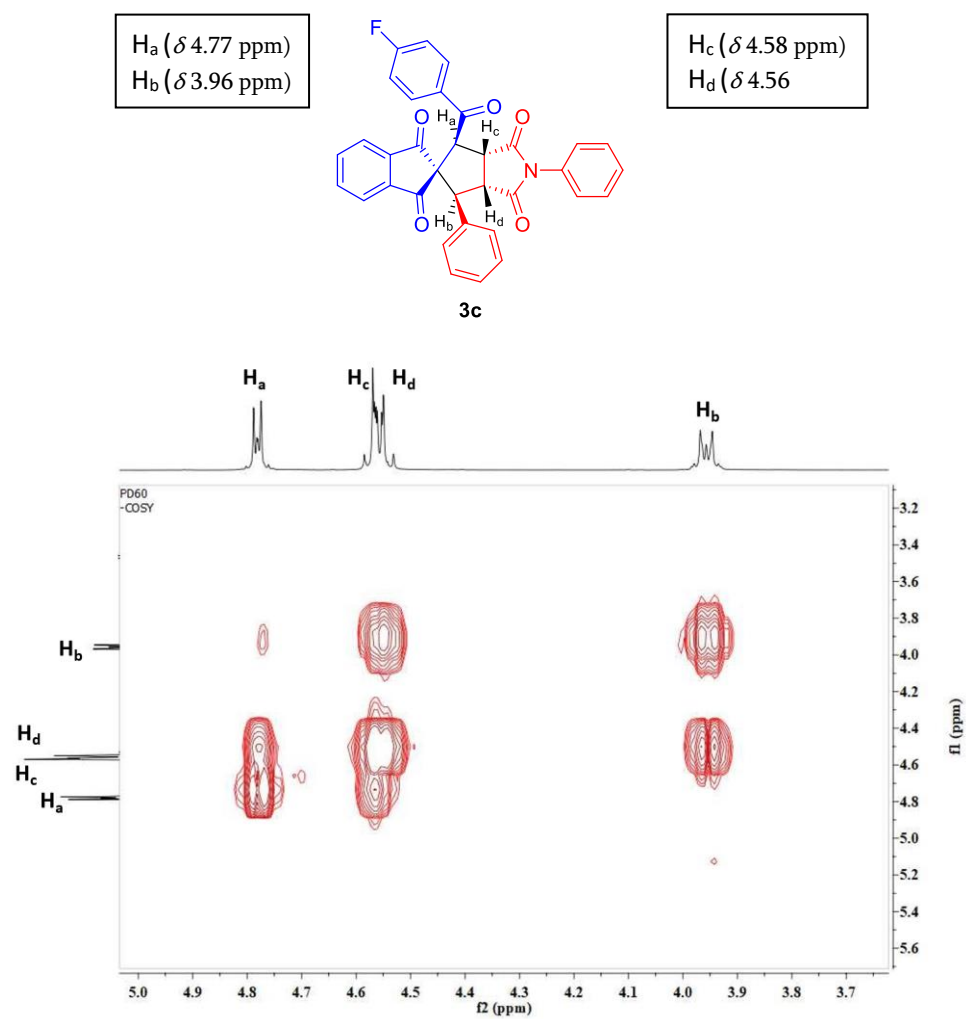

**Figure S1:**  $^1\text{H}$ - $^1\text{H}$  COSY spectrum of **3c**

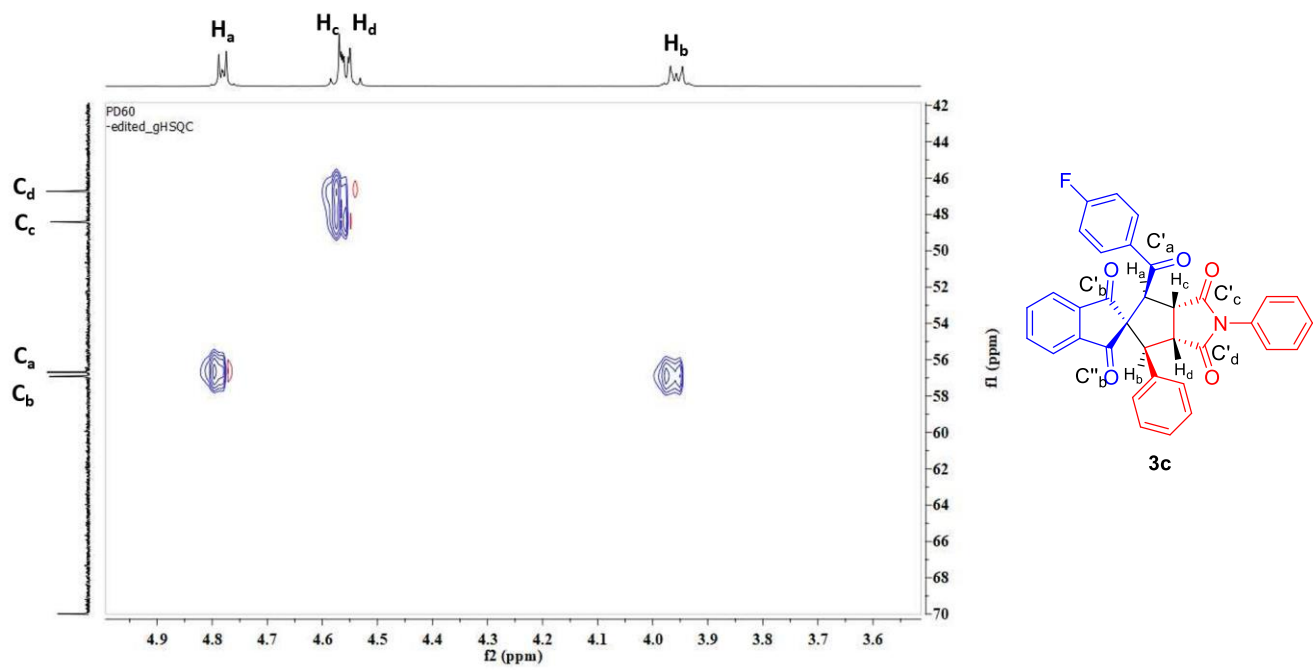

**Figure S2:**  $^1\text{H}$ - $^{13}\text{C}$  HSQC spectrum of **3c**

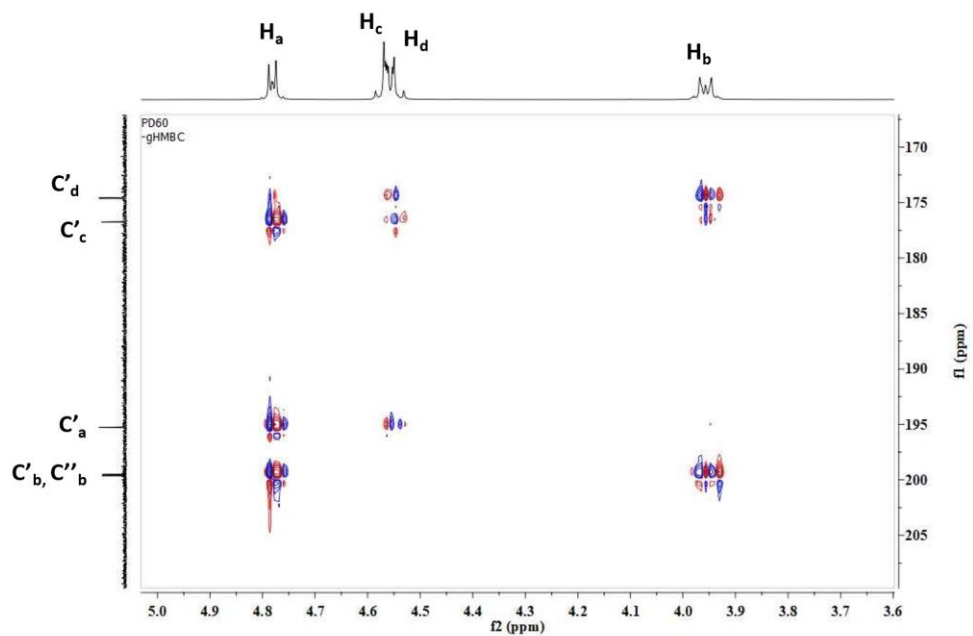

Figure S3:  $^1\text{H}$ - $^{13}\text{C}$  HMBC spectrum of **3c**

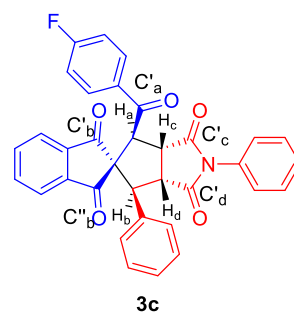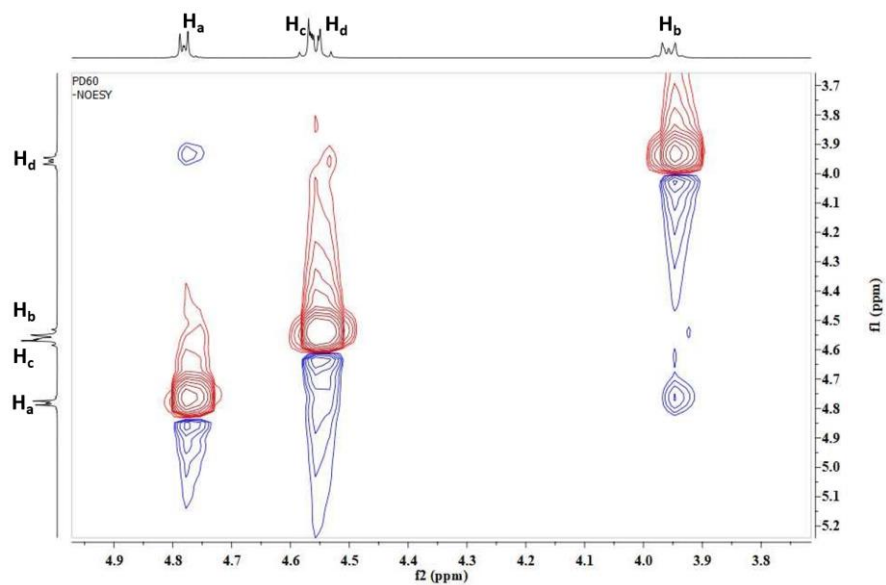

Figure S4:  $^1\text{H}$ - $^1\text{H}$  NOESY spectrum of **3c**

The COSY experiment of **3c** revealed that proton H<sub>b</sub> at 3.96 ppm is correlated with protons H<sub>d</sub>, H<sub>a</sub> at 4.56 and 4.77, respectively, while the proton H<sub>d</sub> at 4.54 ppm is showing correlation with protons H<sub>b</sub>, H<sub>c</sub>, H<sub>a</sub> at 3.96, 4.58 and 4.77 ppm, respectively.

The HSQC experiment of **3c** revealed connectivity between proton H<sub>a</sub> at 4.77 ppm and carbon C<sub>a</sub> having chemical shift at 56.6 ppm. Similarly, it disclosed that the proton H<sub>b</sub> at 3.96 ppm is directly bonded to carbon C<sub>b</sub> at 56.9 ppm and the proton H<sub>c</sub> at 4.58 ppm is connected directly to carbon C<sub>c</sub> having chemical shift at 46.8 ppm while the proton H<sub>d</sub> at 4.56 ppm is directly bonded to carbon C<sub>d</sub> of chemical shift 48.4 ppm.

NOESY experiment of **3c** revealed that H<sub>a</sub> at 4.77 ppm is connected weakly with H<sub>b</sub> at 3.96 ppm while the H<sub>c</sub> at 4.58 ppm is connected very weakly with H<sub>d</sub> at 4.56 ppm. The HMBC experiment revealed the correlation between H<sub>a</sub> at 4.77 ppm with four carbonyl groups at 176.7, 174.6 and 195.2, 199.6 ppm and numerous carbon centres that exist nearby. Thus, the H<sub>b</sub> at 3.96 ppm shows correlation with four carbonyl groups at 176.7, 174.6 and 195.2, 199.6 ppm, the H<sub>c</sub> at 4.58 ppm shows correlation with three carbonyl groups at 174.6, 176.7, 195.2 ppm while the H<sub>d</sub> at 4.56 ppm shows correlation with three carbonyl groups at 174.6, 176.7 and 195.2 ppm.

We also performed two-dimensional experiments for **5o**. HSQC spectrum of **5o** showed connectivity between the proton H<sub>a</sub> at 4.73 ppm to the carbon C<sub>a</sub> bound directly to it at 49.3 ppm and correlation between H<sub>b</sub> at 4.64 ppm and C<sub>b</sub> at 43.4 ppm. The HMBC spectral studies of **5o** showed the correlation of H<sub>a</sub> having resonance at 4.73 ppm with two carbonyls C<sub>a</sub>' and C<sub>b</sub>' resonating at 179.9 and 168.4 ppm. The NOESY spectrum of **5o** indicated that H<sub>a</sub> and H<sub>b</sub> are on opposite side *i.e.*, trans as H<sub>a</sub> proton showing its correlation with OH proton and H<sub>b</sub> proton is showing its correlation with H<sub>c</sub> proton. This confirmed that both H<sub>a</sub> and H<sub>b</sub> protons are in opposite direction.

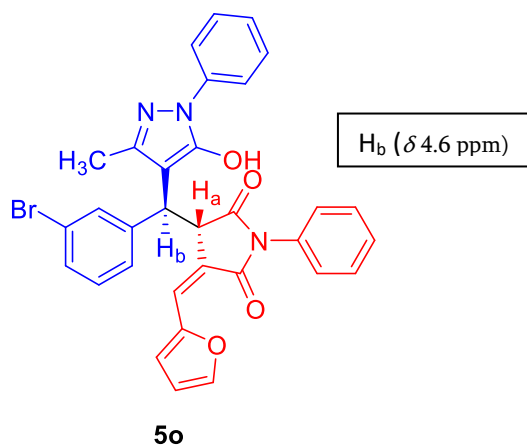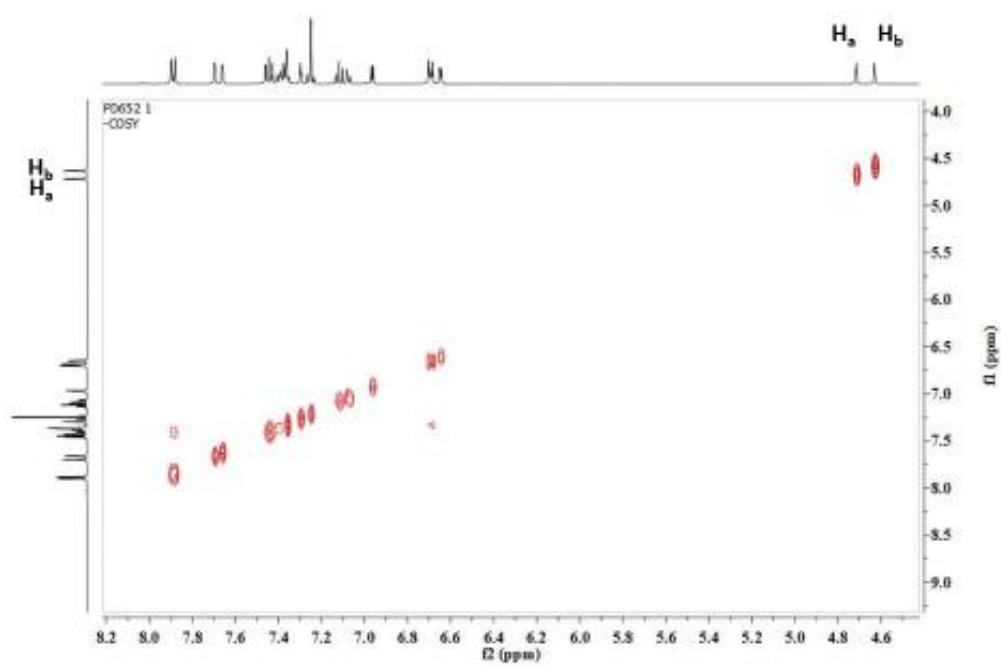

**Figure S5:**  $^1\text{H}$ - $^1\text{H}$  COSY spectrum of **5o**

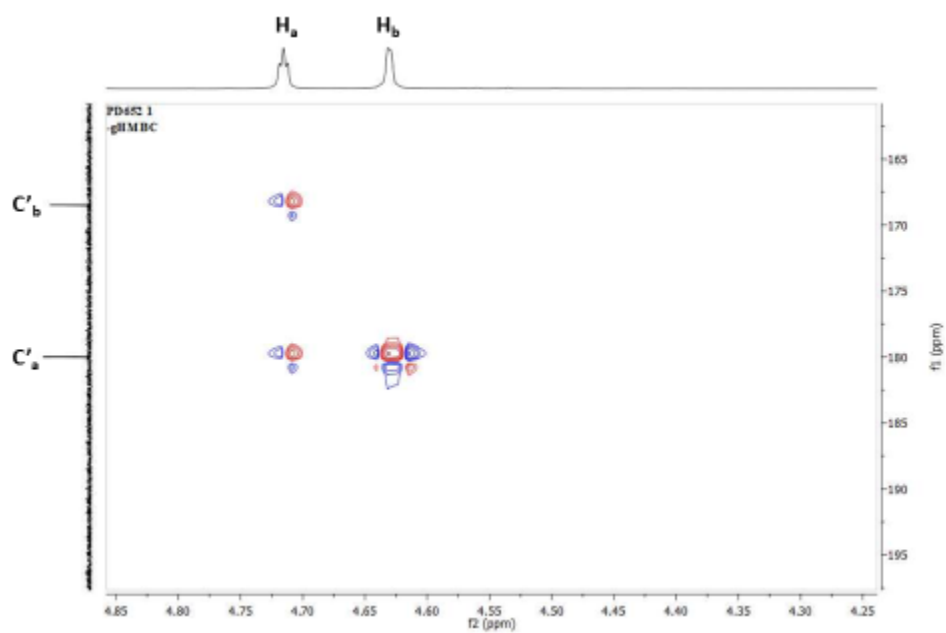

**Figure S6:**  $^1\text{H}$ - $^{13}\text{C}$  HMBC spectrum of **5o**

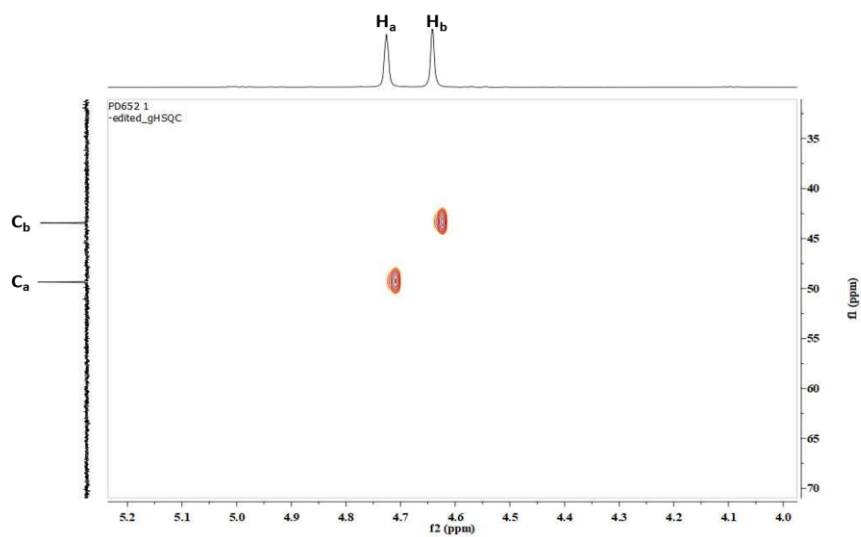

**Figure S7:**  $^1\text{H}$ - $^{13}\text{C}$  HSQC spectrum of **5o**

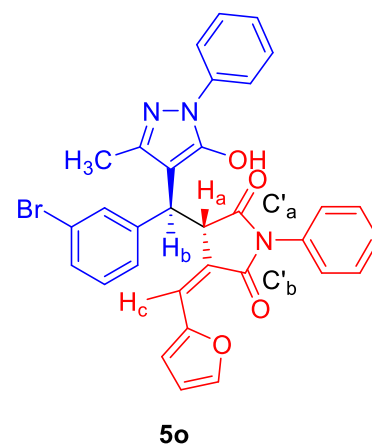



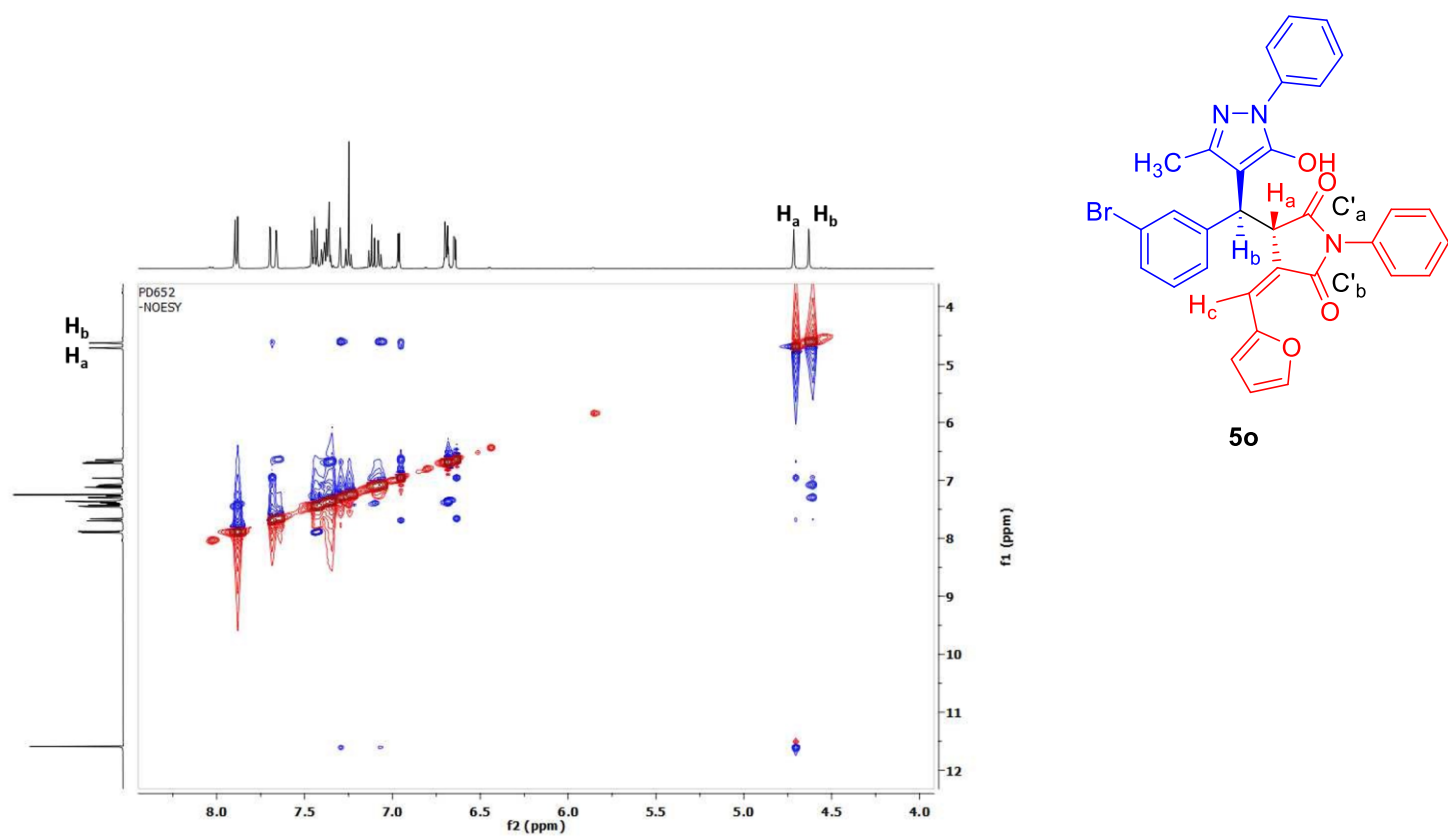

**Figure S8:**  $^1\text{H}$ - $^1\text{H}$  NOESY spectrum of **5o**

### General procedures:

#### General procedure for the synthesis of indanediones **1a-1d**:

Ninhydrin (10 mmol), acetophenone (10 mmol) were dissolved in 20 mL glacial acetic acid in a 100 mL RB flask, and the reaction mixture was refluxed for 1 hour. After completion of the reaction, as checked by

TLC, the contents were diluted with EtOAc and washed with brine solution. The organic layer was collected, dried over anhydrous Na<sub>2</sub>SO<sub>4</sub>, and concentrated by evaporation. The crude material was purified by column chromatography on silica gel (25% EtOAc/hexanes) to obtain pure indanedione **1**.

#### **Synthesis of benzylidene succinimides 2a-2f:**

A solution of an *N*-arylmaleimide (10 mmol) and triphenylphosphine (10 mmol) in ethanol (60 mL) was stirred at room temperature for 30 min. To the reaction mixture was added an aromatic aldehyde (10 mmol), and the reaction mixture was kept on stirring at room temperature for overnight, and the solid product was isolated by filtration and dried under vacuum.

#### **General procedure for the synthesis of arylidene pyrazolidinones 4a-4d:**

Arylaldehyde (10 mmol), pyrazolone (10 mmol) and MgO (0.20 g, 5 mmol) were dissolved in 80 mL of acetonitrile in a 150 mL RB and the contents were stirred at reflux temperature. After completion of the reaction, as checked by TLC, the reaction mixture was concentrated and the residue was dissolved in ethyl acetate and washed with brine solution. The organic layer was collected, dried over anhydrous Na<sub>2</sub>SO<sub>4</sub>, filtered and concentrated in vacuo. The resulting crude mixture was subjected to column chromatography on silica gel (10% EtOAc/hexanes) to obtain pure arylidene pyrazolidinones **4**.

#### **Characterization data:**

**(3a*S*,4*S*,6*S*,6a*R*)-4-Benzoyl-2,6-diphenyl-3a,4,6,6a-tetrahydro-1*H*-spiro[cyclopenta[*c*]pyrrole-5,2'-indene]-1,1',3,3'(2*H*)-tetraone (3a)**

Yield: 106 mg (81%) as white solid; mp: 229–231 °C.

<sup>1</sup>H NMR (CDCl<sub>3</sub>, 500 MHz): δ 7.74 (dd, *J* = 8.3, 1.1 Hz, 2H), 7.63 (dd, *J* = 12.8, 7.5, 2H), 7.59–7.52 (m,

2H), 7.48 (t,  $J = 7.6$  Hz, 2H), 7.39 (ddd,  $J = 12.8, 7.3, 1.1$  Hz, 4H), 7.28 (s, 1H), 7.25 (s, 1H), 7.13–7.10 (m, 2H), 7.04 (ddd,  $J = 8.3, 7.6, 3.6$  Hz, 3H), 4.84 (d,  $J = 7.4$  Hz, 1H, H<sub>a</sub>), 4.66–4.63 (m, 1H, H<sub>c</sub>), 4.55 (dd,  $J = 11.3, 9.5$  Hz, 1H, H<sub>d</sub>), 3.99 (d,  $J = 11.4$  Hz, 1H, H<sub>b</sub>) ppm; <sup>13</sup>C NMR (CDCl<sub>3</sub>, 125 MHz):  $\delta$  199.64, 199.62, 196.8, 176.7, 174.7, 142.3, 141.4, 136.1, 135.9, 135.4, 133.5, 132.5, 131.7, 130.2, 129.24, 129.23, 128.82, 128.81, 128.7, 128.6, 128.55, 128.50, 128.4, 128.2, 126.51, 126.50, 126.49, 122.9, 122.8, 70.0, 57.0, 56.7, 48.4, 46.6 ppm.

HRMS (ESI):  $m/z$  calcd for C<sub>34</sub>H<sub>24</sub>NO<sub>5</sub> [M + H]<sup>+</sup>: 526.1649; found: 526.1657.

**(3a*S*,4*S*,6*S*,6a*R*)-4-Benzoyl-6-(4-methoxyphenyl)-2-phenyl-3a,4,6,6a-tetrahydro-1*H*-spiro[cyclopenta[*c*]pyrrole-5,2'-indene]-1,1',3,3'(2*H*)-tetraone (3b)**

Yield: 106 mg (76%) as white solid; mp: 195–197 °C.

<sup>1</sup>H NMR (CDCl<sub>3</sub>, 500 MHz):  $\delta$  7.76 (d,  $J = 7.3$  Hz, 2H), 7.69 (d,  $J = 7.4$  Hz, 1H), 7.65–7.63 (m, 2H), 7.59 (d,  $J = 7.1$  Hz, 2H), 7.51 (t,  $J = 7.5$  Hz, 2H), 7.43 (d,  $J = 7.4$  Hz, 1H), 7.39 (d,  $J = 7.8$  Hz, 3H), 7.29 (s, 1H), 7.07 (d,  $J = 8.3$  Hz, 2H), 6.61 (d,  $J = 8.3$  Hz, 2H), 4.83 (d,  $J = 7.3$  Hz, 1H, H<sub>a</sub>), 4.64 (t,  $J = 8.3$  Hz, 1H, H<sub>c</sub>), 4.51 (t,  $J = 10.4$  Hz, 1H, H<sub>d</sub>), 3.97 (d,  $J = 11.4$  Hz, 1H, H<sub>b</sub>), 3.64 (s, 3H) ppm; <sup>13</sup>C NMR (CDCl<sub>3</sub>, 125 MHz):  $\delta$  199.7, 196.7, 176.7, 174.7, 159.3, 142.3, 141.4, 136.0, 135.9, 135.3, 133.3, 129.3, 129.1, 128.7, 128.6, 128.4, 126.4, 124.4, 122.9, 122.7, 113.9, 69.9, 56.6, 56.5, 55.0, 48.6, 46.4 ppm.

HRMS (ESI):  $m/z$  calcd for C<sub>35</sub>H<sub>26</sub>NO<sub>6</sub> [M + H]<sup>+</sup>: 556.1755; found: 556.1756.

**(3a*S*,4*S*,6*S*,6a*R*)-4-(4-Fluorobenzoyl)-2,6-diphenyl-3a,4,6,6a-tetrahydro-1*H*-spiro[cyclopenta[*c*]pyrrole-5,2'-indene]-1,1',3,3'(2*H*)-tetraone (3c)**

Yield: 99 mg (73%) as white solid; mp: 218–220 °C.

<sup>1</sup>H NMR (CDCl<sub>3</sub>, 500 MHz):  $\delta$  7.86 (dd,  $J = 9.2, 5.4$  Hz, 2H), 7.68–7.65 (m, 2H), 7.63–7.57 (m, 2H), 7.49 (d,  $J = 7.8$  Hz, 1H), 7.48–4.87 (m, 1H), 7.43–7.35 (m, 3H), 7.12 (dd,  $J = 8.6, 1.5$  Hz, 2H), 7.06 (s, 1H), 7.05–7.01 (m, 2H), 6.97 (t,  $J = 8.8$  Hz, 2H), 4.81–4.78 (m, 1H, H<sub>a</sub>), 4.58 (dd,  $J = 3.0, 1.3$  Hz, 1H, H<sub>c</sub>), 4.56 (t,  $J = 2.8$  Hz, 1H, H<sub>d</sub>), 3.99–3.95 (m, 1H, H<sub>b</sub>) ppm; <sup>13</sup>C NMR (CDCl<sub>3</sub>, 125 MHz):  $\delta$  199.6, 199.5, 195.2,

176.7, 174.6, 166.9, 164.9, 142.3, 141.3, 136.1, 135.5, 132.3, 132.2, 131.8, 131.7, 131.6, 129.2, 128.8, 128.6, 128.4, 128.25, 128.22, 126.49, 126.47, 126.46, 123.0, 122.9, 115.8, 115.6, 70.0, 56.9, 56.6, 48.4, 46.7 ppm.

$^{19}\text{F}$  NMR (470 MHz,  $\text{CDCl}_3$ ):  $-103.58$  (1F) ppm.

HRMS (ESI):  $m/z$  calcd for  $\text{C}_{34}\text{H}_{23}\text{NO}_5\text{F}$  [ $\text{M} + \text{H}$ ] $^+$ : 544.1555; found: 544.1557.

**(3a*S*,4*S*,6*S*,6a*R*)-4-(4-Fluorobenzoyl)-6-(4-methoxyphenyl)-2-phenyl-3a,4,6,6a-tetrahydro-1*H*-spiro[cyclopenta[*c*]pyrrole-5,2'-indene]-1,1',3,3'(2*H*)-tetraone (3d)**

Yield: 102 mg (71%) as white solid; mp: 202–204 °C.

$^1\text{H}$  NMR ( $\text{CDCl}_3$ , 500 MHz):  $\delta$  7.84–7.81 (m, 2H), 7.67 (t,  $J = 6.5\text{ Hz}$ , 1H), 7.65–7.56 (m, 3H), 7.46 (t,  $J = 7.7$ , 2H), 7.39 (d,  $J = 7.3$  Hz, 1H), 7.37–7.34 (m, 2H), 7.03 (d,  $J = 8.7$  Hz, 2H), 6.94 (t,  $J = 8.6$  Hz, 2H), 6.58 (d,  $J = 8.8$  Hz, 2H), 4.76 (d,  $J = 7.3$  Hz, 1H,  $\text{H}_a$ ), 4.54 (d,  $J = 7.4$  Hz, 1H,  $\text{H}_c$ ), 4.52–4.4 (m, 1H,  $\text{H}_d$ ), 3.93 (d,  $J = 11.3$  Hz, 1H,  $\text{H}_b$ ), 3.60 (s, 3H) ppm;  $^{13}\text{C}$  NMR ( $\text{CDCl}_3$ , 125 MHz):  $\delta$  199.8, 199.7, 195.2, 176.8, 174.6, 166.9, 164.9, 159.4, 142.4, 141.4, 136.1, 135.5, 132.3, 132.2, 131.7, 131.7, 131.6, 129.4, 129.25, 129.23, 128.7, 126.4, 124.3, 123.0, 122.9, 115.8, 115.6, 114.0, 69.9, 56.5, 56.4, 55.1, 48.7, 46.6 ppm.

$^{19}\text{F}$  NMR (470 MHz,  $\text{CDCl}_3$ ):  $-103.63$  (1F) ppm.

HRMS (ESI):  $m/z$  calcd for  $\text{C}_{35}\text{H}_{25}\text{NO}_6\text{F}$  [ $\text{M} + \text{H}$ ] $^+$ : 574.1660; found: 574.1668.

**(3a*S*,4*S*,6*S*,6a*R*)-4-(4-Methylbenzoyl)-2,6-diphenyl-3a,4,6,6a-tetrahydro-1*H*-spiro[cyclopenta[*c*]pyrrole-5,2'-indene]-1,1',3,3'(2*H*)-tetraone (3e)**

Yield: 98 mg (73%) as white solid; mp: 158–160 °C.

$^1\text{H}$  NMR ( $\text{CDCl}_3$ , 500 MHz):  $\delta$  7.68 (d,  $J = 1.7$  Hz, 1H), 7.67 (dd,  $J = 1.8, 1.3$  Hz, 1H), 7.66–7.65 (m, 1H), 7.63 (ddd,  $J = 7.2, 1.3, 0.8$  Hz, 1H), 7.60 (dd,  $J = 7.2, 1.4$  Hz, 1H), 7.58 (dd,  $J = 4.1, 1.5$  Hz, 1H), 7.55 (dd,  $J = 7.2, 1.3$  Hz, 1H), 7.49 (dd,  $J = 7.0, 1.0$  Hz, 1H), 7.47 (d,  $J = 1.6$  Hz, 1H), 7.42–7.39 (m, 1H), 7.39–7.37 (m, 1H), 7.36 (t,  $J = 1.1$ , 1H), 7.13 (d,  $J = 1.6$  Hz, 1H), 7.12 (s, 1H), 7.08 (s, 1H), 7.06 (dd,  $J = 2.9, 1.1$  Hz, 1H), 7.05 (d,  $J = 1.2$  Hz, 1H), 7.03 (dd,  $J = 5.0, 3.5$  Hz, 1H), 4.82 (d,  $J = 7.2$  Hz, 1H,  $\text{H}_a$ ), 4.62–4.58 (m,

1H, H<sub>c</sub>), 4.55 (d, *J* = 9.4 Hz, 1H, H<sub>d</sub>), 3.98 (d, *J* = 10.7 Hz, 1H, H<sub>b</sub>), 2.28 (s, 3H) ppm; <sup>13</sup>C NMR (CDCl<sub>3</sub>, 125 MHz): δ 199.7, 199.5, 196.3, 176.7, 174.8, 144.5, 142.4, 141.4, 135.9, 135.3, 133.4, 132.5, 131.7, 129.2, 129.2, 129.2, 129.19, 129.15, 129.0, 128.7, 128.6, 128.36, 128.30, 126.5, 126.5, 122.9, 122.8, 69.9, 65.9, 56.8, 56.7, 48.4, 46.7, 21.6 ppm.

HRMS (ESI): *m/z* calcd for C<sub>35</sub>H<sub>26</sub>NO<sub>5</sub> [M + H]<sup>+</sup>: 540.1805; found: 540.1815.

**(3aR,4S,6S,6aS)-4-(4-Methoxyphenyl)-6-(4-methylbenzoyl)-2-phenyl-3a,4,6,6a-tetrahydro-1H-spiro[cyclopenta[*c*]pyrrole-5,2'-indene]-1,1',3,3'(2H)-tetraone (3f)**

Yield: 102 mg (72%) as white solid; mp: 232–234 °C.

<sup>1</sup>H NMR (CDCl<sub>3</sub>, 500 MHz) : δ 7.67 (m, 2H), 7.64 (m, 1H), 7.62 (s, 1H), 7.58 (m, 2H), 7.48 (m, 2H), 7.40 (dt, *J* = 3.7, 1.6 Hz, 1H), 7.37 (q, *J* = 2.1 Hz, 1H), 7.35 (d, *J* = 1.1 Hz, 1H), 7.05 (m, 4H), 6.59 (d, *J* = 8.8 Hz, 2H), 4.79 (d, *J* = 7.5 Hz, 1H, H<sub>a</sub>), 4.58 (dd, *J* = 9.4, 7.5 Hz, 1H, H<sub>d</sub>), 4.5 (dd, *J* = 11.4, 9.4 Hz, 1H), 3.95 (d, *J* = 11.4 Hz, 1H, H<sub>b</sub>), 3.61 (s, 3H, H<sub>c</sub>), 2.27 (s, 3H) ppm; <sup>13</sup>C NMR (CDCl<sub>3</sub>, 125 MHz): δ 199.89, 199.80, 196.2, 176.7, 174.88, 174.86, 159.3, 144.5, 142.5, 141.4, 136.0, 135.3, 133.4, 131.7, 129.5, 129.4, 129.2, 129.1, 129.0, 128.7, 126.50, 124.57, 122.98, 122.90, 114.0, 69.9, 56.6, 56.4, 55.1, 48.7, 46.7, 21.6 ppm.

HRMS (ESI): *m/z* calcd for C<sub>36</sub>H<sub>28</sub>NO<sub>6</sub> [M + H]<sup>+</sup>: 570.1911; found: 570.1934.

**(3aS,4S,6S,6aR)-4-(4-Bromobenzoyl)-2,6-diphenyl-3a,4,6,6a-tetrahydro-1H-spiro[cyclopenta[*c*]pyrrole-5,2'-indene]-1,1',3,3'(2H)-tetraone (3g)**

Yield: 98 mg (64%) as white solid; mp: 222–224 °C.

<sup>1</sup>H NMR (CDCl<sub>3</sub>, 500 MHz) : δ 7.99 (d, *J* = 8.0 Hz, 1H), 7.81 (dd, *J* = 11.9, 4.4 Hz, 1H), 7.75 (t, *J* = 8.2 Hz, 1H), 7.71 (d, *J* = 7.8 Hz, 1H), 7.46 (t, *J* = 8.0 Hz, 2H), 7.38 (d, *J* = 7.5 Hz, 1H), 7.33 (m, 4H), 7.23 (d, *J* = 3.1 Hz, 1H), 7.21 (s, 2H), 7.18 (d, *J* = 7.2 Hz, 2H), 7.14 (s, 1H), 7.13 (s, 1H), 4.75 (d, *J* = 12.3 Hz, 1H, H<sub>a</sub>), 4.54 (dd, *J* = 12.6, 8.7 Hz, 1H, H<sub>c</sub>), 4.17 (d, *J* = 10.5 Hz, 1H, H<sub>d</sub>), 3.93 (dd, *J* = 10.6, 8.7 Hz, 1H, H<sub>b</sub>) ppm; <sup>13</sup>C NMR (CDCl<sub>3</sub>, 125 MHz): δ 198.9, 198.8, 195.5, 175.5, 173.9, 142.6, 140.9, 138.4, 136.7, 135.8, 134.7, 131.7, 131.6, 129.6, 129.2, 129.1, 129.0, 128.9, 128.0, 127.7, 126.9, 123.7, 123.6, 64.1, 63.2, 51.5,

50.8, 50.3 ppm.

HRMS (ESI):  $m/z$  calcd for  $C_{34}H_{23}NO_5Br$   $[M + H]^+$ : 604.0754; found: 604.0750.

**(3a*S*,4*S*,6*S*,6a*R*)-4-(4-Bromobenzoyl)-6-(4-methoxyphenyl)-2-phenyl-3a,4,6,6a-tetrahydro-1*H*-spiro[cyclopenta[*c*]pyrrole-5,2'-indene]-1,1',3,3'(2*H*)-tetraone (3h)**

Yield: 100 mg (63%) as white solid; mp: 216–218 °C.

$^1H$  NMR ( $CDCl_3$ , 500 MHz) :  $\delta$  7.68 (m, 2H), 7.65 (m, 3H), 7.62 (dd,  $J = 7.0, 1.8$  Hz, 1H), 7.48 (m, 2H), 7.42 (m, 3H), 7.35 (m, 2H), 7.03 (d,  $J = 8.7$  Hz, 2H), 6.59 (d,  $J = 8.8$  Hz, 2H), 4.75 (d,  $J = 7.2$  Hz, 1H,  $H_a$ ), 4.54 (dd,  $J = 9.4, 7.2$  Hz, 1H,  $H_c$ ), 4.48 (dd,  $J = 11.2, 9.4$  Hz, 1H,  $H_d$ ), 3.93 (d,  $J = 11.2$  Hz, 1H,  $H_b$ ), 3.61 (s, 3H) ppm;  $^{13}C$  NMR ( $CDCl_3$ , 125 MHz):  $\delta$  199.8, 199.7, 196.1, 176.7, 174.6, 159.4, 142.4, 141.4, 136.3, 136.2, 135.5, 134.7, 132.2, 131.8, 131.6, 130.3, 129.8, 129.4, 129.2, 128.9, 128.8, 126.5, 126.4, 126.4, 126.47, 126.45, 126.44, 126.43, 126.42, 124.3, 124.2, 123.0, 122.9, 114.0, 69.9, 56.6, 56.4, 55.1, 48.6, 46.5 ppm.

HRMS (ESI):  $m/z$  calcd for  $C_{35}H_{24}NO_6BrNa$   $[M + Na]^+$ : 656.0679; found: 656.0685.

**(3a*S*,4*S*,6*S*,6a*R*)-4-benzoyl-2,6-bis(4-methoxyphenyl)-3a,4,6,6a-tetrahydro-1*H*-spiro[cyclopenta[*c*]pyrrole-5,2'-indene]-1,1',3,3'(2*H*)-tetraone (3i)**

Yield: 109 mg (75%) as white solid; mp: 129–131 °C

$^1H$  NMR ( $CDCl_3$ , 500 MHz) :  $\delta$  7.74 (d,  $J = 1.1$  Hz, 1H), 7.72 (t,  $J = 1.6$  Hz, 1H), 7.66 (dt,  $J = 7.5, 0.9$  Hz, 1H), 7.62–7.61 (m, 1H), 7.61–7.60 (m, 1H), 7.56 (ddd,  $J = 8.5, 7.8, 1.3$  Hz, 1H), 7.39–7.36 (m, 1H), 7.29–7.28 (m, 1H), 7.27–7.26 (m, 1H), 7.26–7.23 (m, 2H), 7.05–7.04 (m, 1H), 7.03–7.02 (m, 1H), 7.00–6.98 (m, 1H), 7.00–6.98 (m, 1H), 6.60–6.58 (m, 1H), 6.58–6.56 (m, 1H), 4.79 (d,  $J = 7.4$  Hz, 1H,  $H_a$ ), 4.59 (dd,  $J = 9.4, 7.4$  Hz, 1H,  $H_c$ ), 4.46 (dd,  $J = 11.5, 9.4$  Hz, 1H,  $H_d$ ), 3.93 (d,  $J = 11.5$  Hz, 1H,  $H_b$ ), 3.82 (s, 3H), 3.61 (s, 3H) ppm;  $^{13}C$  NMR ( $CDCl_3$ , 125 MHz):  $\delta$  199.8, 196.9, 177.0, 175.0, 159.5, 159.3, 142.3, 141.4, 136.08, 136.04, 135.4, 133.4, 129.47, 129.45, 129.43, 129.40, 128.87, 128.82, 128.7, 128.5, 128.48, 128.44, 127.78, 127.76, 127.74, 127.71, 127.69, 127.67, 124.4, 124.3, 122.97, 122.8, 114.56, 114.53, 114.51, 114.48, 114.46, 114.05, 114.03, 114.00, 113.97, 113.95, 69.9, 56.6, 56.5, 55.6, 55.59, 55.56, 55.15, 55.12, 48.6,

46.4 ppm.

HRMS (ESI):  $m/z$  calcd for  $C_{36}H_{27}NO_7$   $[M + H]^+$ : 586.1866; found: 586.1848.

**(3a*S*,4*S*,6*S*,6a*R*)-4-(4-bromobenzoyl)-2,6-bis(4-methoxyphenyl)-3a,4,6,6a-tetrahydro-1*H*-spiro[cyclopenta[*c*]pyrrole-5,2'-indene]-1,1',3,3'(2*H*)-tetraone (3j)**

Yield: 110 mg (67%) as white solid; mp: 214–216 °C.

$^1H$  NMR ( $CDCl_3$ , 500 MHz):  $\delta$  7.68 (dd,  $J = 6.7, 1.6$  Hz, 2H), 7.67–7.64 (m, 3H), 7.63 (dd,  $J = 7.1, 1.9$  Hz, 1H), 7.44–7.40 (m, 2H), 7.27 (s, 1H), 7.25 (s, 1H), 7.03 (d,  $J = 9.1$  Hz, 2H), 7.00–6.96 (m, 2H), 6.60–6.57 (m, 2H), 4.73 (d,  $J = 7.2$  Hz, 1H,  $H_a$ ), 4.50 (dd,  $J = 9.3, 6.9$  Hz, 1H,  $H_c$ ), 4.45 (d,  $J = 9.5$  Hz, 1H,  $H_d$ ), 3.91 (d,  $J = 11.0$  Hz, 1H,  $H_b$ ), 3.83 (s, 3H), 3.61 (s, 3H) ppm;  $^{13}C$  NMR ( $CDCl_3$ , 125 MHz):  $\delta$  199.8, 199.7, 196.1, 176.9, 174.8, 159.6, 159.3, 142.4, 141.3, 136.2, 135.5, 134.6, 131.83, 131.81, 130.46, 130.41, 130.3, 129.43, 129.41, 129.3, 128.91, 127.7, 124.28, 124.22, 123.0, 122.9, 114.57, 114.54, 114.51, 114.0, 69.9, 56.6, 56.4, 55.6, 55.1, 48.6, 46.5 ppm.

HRMS (ESI):  $m/z$  calcd for  $C_{36}H_{26}NO_7Br$   $[M + H]^+$ : 664.0971; found: 664.0955.

**(3a*S*,4*S*,6*R*,6a*R*)-4-Benzoyl-6-(furan-2-yl)-2-(*p*-tolyl)-3a,4,6,6a-tetrahydro-1*H*-spiro[cyclopenta[*c*]pyrrole-5,2'-indene]-1,1',3,3'(2*H*)-tetraone (3k)**

Yield: 104 mg (79%) as white solid; mp: 225–227 °C.

$^1H$  NMR ( $CDCl_3$ , 500 MHz):  $\delta$  7.77–7.74 (m, 1H), 7.73–7.68 (m, 4H), 7.66 (dd,  $J = 7.5, 1.3$  Hz, 1H), 7.63 (dd,  $J = 7.3, 1.2$  Hz, 1H), 7.40 (ddd,  $J = 7.4, 4.2, 1.2$  Hz, 1H), 7.29 (dd,  $J = 10.5, 2.3$  Hz, 3H), 7.25–7.20 (m, 2H), 6.90 (dd,  $J = 1.8, 0.7$  Hz, 1H), 6.29 (dt,  $J = 3.3, 0.8$  Hz, 1H), 6.07 (dd,  $J = 3.3, 1.8$  Hz, 1H), 4.76 (d,  $J = 7.9$  Hz, 1H,  $H_a$ ), 4.58 (dd,  $J = 9.6, 7.9$  Hz, 1H,  $H_c$ ), 4.36 (dd,  $J = 11.1, 9.6$  Hz, 1H,  $H_d$ ), 4.10 (d,  $J = 11.1$  Hz, 1H,  $H_b$ ), 2.39 (s, 3H) ppm;  $^{13}C$  NMR ( $CDCl_3$ , 125 MHz):  $\delta$  198.7, 198.6, 196.4, 176.3, 174.6, 148.0, 142.5, 141.9, 141.4, 138.9, 136.0, 135.9, 135.4, 133.5, 129.93, 129.92, 129.90, 128.9, 128.8, 128.5, 126.31, 126.30, 123.2, 123.0, 110.4, 109.3, 68.2, 56.2, 49.6, 48.2, 46.7, 21.3 ppm.

HRMS (ESI):  $m/z$  calcd for  $C_{33}H_{24}NO_6$   $[M + H]^+$ : 530.1598; found: 530.1614.

**(3a*S*,4*S*,6*R*,6a*S*)-4-Benzoyl-6-(thiophen-2-yl)-2-(*p*-tolyl)-3a,4,6,6a-tetrahydro-1*H*-spiro[cyclopenta[*c*]pyrrole-5,2'-indene]-1,1',3,3'(2*H*)-tetraone (3l)**

Yield: 110 mg (81%) as white solid; mp: 275–277 °C.

<sup>1</sup>H NMR (CDCl<sub>3</sub>, 500 MHz) : δ 7.73–7.71 (m, 1H), 7.70 (d, *J* = 1.1 Hz, 1H), 7.68 (d, *J* = 1.8 Hz, 1H), 7.65 (m, 1H), 7.63 (dd, *J* = 7.2, 1.2 Hz, 2H), 7.60–7.57 (m, 1H), 7.40–7.36 (m, 1H), 7.28 (s, 1H), 7.24 (d, *J* = 1.7 Hz, 2H), 7.23 (s, 1H), 7.22 (dd, *J* = 4.3, 1.9 Hz, 1H), 6.93 (dd, *J* = 5.1, 1.2 Hz, 1H), 6.87–6.86 (m, 1H), 6.68 (dd, *J* = 5.1, 3.6 Hz, 1H), 4.77 (d, *J* = 7.8 Hz, 1H, H<sub>a</sub>), 4.58 (dd, *J* = 9.4, 7.8 Hz, 1H, H<sub>c</sub>), 4.41 (dd, *J* = 11.2, 9.5 Hz, 1H, H<sub>d</sub>), 4.27 (d, *J* = 11.2 Hz, 1H, H<sub>b</sub>), 2.37 (s, 3H) ppm; <sup>13</sup>C NMR (CDCl<sub>3</sub>, 125 MHz): δ 199.29, 199.26, 196.4, 176.40, 174.44, 142.5, 141.6, 138.8, 136.1, 136.0, 135.5, 135.3, 133.6, 129.8, 129.0, 128.82, 128.81, 128.5, 127.4, 126.9, 126.29, 126.28, 126.27, 125.4, 123.1, 123.0, 69.6, 56.4, 51.8, 50.5, 46.6, 21.3 ppm.

HRMS (ESI): *m/z* calcd for C<sub>33</sub>H<sub>24</sub>NO<sub>5</sub>S [M + H]<sup>+</sup>: 546.1370; found: 546.1378.

**(3a*S*,4*S*,6*R*,6a*R*)-4-(4-Fluorobenzoyl)-6-(furan-2-yl)-2-(*p*-tolyl)-3a,4,6,6a-tetrahydro-1*H*-spiro[cyclopenta[*c*]pyrrole-5,2'-indene]-1,1',3,3'(2*H*)-tetraone (3m)**

Yield: 103 mg (75%) as white solid; mp: 200–202 °C.

<sup>1</sup>H NMR (CDCl<sub>3</sub>, 500 MHz) : δ 7.82–7.76 (m, 4H), 7.70 (ddd, *J* = 8.7, 7.1, 1.4 Hz, 2H), 7.29 (d, *J* = 8.1 Hz, 2H), 7.24–7.22 (m, 2H), 6.95 (d, *J* = 8.7 Hz, 2H), 6.90 (dd, *J* = 1.8, 0.6 Hz, 1H), 6.29 (dd, *J* = 2.6, 0.8 Hz, 1H), 6.07 (dd, *J* = 3.3, 1.9 Hz, 1H), 4.72 (d, *J* = 7.9 Hz, 1H, H<sub>a</sub>), 4.54–4.50 (m, 1H, H<sub>c</sub>), 4.37 (dd, *J* = 11.1, 9.6 Hz, 1H, H<sub>d</sub>), 4.08 (d, *J* = 11.1 Hz, 1H, H<sub>b</sub>), 2.39 (s, 3H) ppm; <sup>13</sup>C NMR (CDCl<sub>3</sub>, 125 MHz): δ 198.7, 198.6, 194.88, 194.86, 176.4, 174.5, 167.0, 165.0, 147.8, 142.5, 141.9, 141.3, 139.0, 136.1, 135.6, 131.8, 131.7, 129.97, 129.96, 128.8, 126.2, 123.2, 123.0, 115.8, 115.6, 110.5, 109.4, 68.2, 56.0, 49.5, 48.2, 46.8, 21.3 ppm.

<sup>19</sup>F NMR (470 MHz, CDCl<sub>3</sub>): –103.40 (1F) ppm.

HRMS (ESI): *m/z* calcd for C<sub>33</sub>H<sub>23</sub>NO<sub>6</sub>F [M + H]<sup>+</sup>: 548.1504; found: 548.1529.



**(3a*S*,4*S*,6*R*,6a*S*)-4-(4-Fluorobenzoyl)-6-(thiophen-2-yl)-2-(*p*-tolyl)-3a,4,6,6a-tetrahydro-1*H*-spiro[cyclopenta[*c*]pyrrole-5,2'-indene]-1,1',3,3'(2*H*)-tetraone (3n)**

Yield: 110 mg (78%) as white solid; mp: 208–210 °C.

<sup>1</sup>H NMR (CDCl<sub>3</sub>, 500 MHz): δ 7.81 (dd, *J* = 8.5, 5.3 Hz, 2H), 7.76(d, *J* = 7.4, 1H), 7.70 (t, *J* = 7.7 Hz, 1H), 7.67 (d, *J* = 6.9 Hz, 1H), 7.64 (d, *J* = 7.2 Hz, 1H), 7.31–7.27 (m, 3H), 7.23 (d, *J* = 8.2 Hz, 2H), 6.96 (t, *J* = 7.8 Hz, 2H), 6.88 (d, *J* = 3.2 Hz, 1H), 6.71–6.69 (m, 1H), 4.75 (d, *J* = 7.8 Hz, 1H, H<sub>a</sub>), 4.53 (d, *J* = 7.9 Hz, 1H, H<sub>c</sub>), 4.47–4.42 (m, 1H, H<sub>d</sub>), 4.27 (d, *J* = 11.1 Hz, 1H, H<sub>b</sub>), 2.38 (s, 3H) ppm; <sup>13</sup>C NMR (CDCl<sub>3</sub>, 125 MHz): δ 199.29, 199.26, 194.9, 176.4, 174.3, 142.5, 141.5, 138.9, 136.3, 135.6, 135.2, 131.8, 131.7, 129.9, 128.9, 127.4, 126.9, 126.3, 126.2, 125.4, 123.17, 123.13, 115.8, 115.6, 69.6, 56.3, 51.7, 50.5, 46.7, 21.3 ppm.

HRMS (ESI): *m/z* calcd for C<sub>33</sub>H<sub>23</sub>NFO<sub>5</sub>S [M + H]<sup>+</sup>: 564.1275; found: 564.1282.

**(3a*R*,4*R*,6*S*,6a*S*)-4-(Furan-2-yl)-6-(4-methylbenzoyl)-2-(*p*-tolyl)-3a,4,6,6a-tetrahydro-1*H*-spiro[cyclopenta[*c*]pyrrole-5,2'-indene]-1,1',3,3'(2*H*)-tetraone (3o)**

Yield: 110 mg (81%) as white solid; mp: 247–249 °C.

<sup>1</sup>H NMR (CDCl<sub>3</sub>, 500 MHz) δ: 7.78–7.76 (m, 1H), 7.75–7.73 (m, 1H), 7.69 (dt, *J* = 7.5, 3.7 Hz, 1H), 7.66 (dd, *J* = 7.3, 1.3 Hz, 1H), 7.63 (d, *J* = 1.7 Hz, 1H), 7.61 (d, *J* = 1.7 Hz, 1H), 7.30 (m, 2H), 7.25–7.24 (m, 1H), 7.23 (s, 1H), 7.07 (dd, *J* = 8.4, 0.5 Hz, 2H), 6.90 (dd, *J* = 1.8, 0.7 Hz, 1H), 6.30 (dt, *J* = 3.3, 0.9 Hz, 1H), 6.07 (dd, *J* = 3.3, 1.8 Hz, 1H), 4.74 (d, *J* = 8.0 Hz, 1H, H<sub>a</sub>), 4.54 (dd, *J* = 9.6, 8.1 Hz, 1H, H<sub>c</sub>), 4.37 (dd, *J* = 11.1, 9.6 Hz, 1H, H<sub>d</sub>), 4.09 (d, *J* = 11.1 Hz, 1H, H<sub>b</sub>), 2.39 (s, 3H), 2.28 (s, 3H) ppm; <sup>13</sup>C NMR (CDCl<sub>3</sub>, 125 MHz): δ 198.8, 198.7, 195.8, 176.3, 174.7, 148.1, 144.7, 142.4, 142.0, 141.3, 138.9, 135.9, 135.3, 133.3, 129.9, 129.2, 129.0, 128.9, 126.31, 126.30, 126.29, 126.28, 123.2, 123.0, 110.5, 109.2, 68.1, 56.1, 49.4, 48.3, 46.9, 21.6, 21.3 ppm.

HRMS (ESI): *m/z* calcd for C<sub>34</sub>H<sub>26</sub>NO<sub>6</sub> [M + H]<sup>+</sup>: 544.1755; found: 544.1757.

**(3a*S*,4*S*,6*R*,6a*S*)-4-(4-Methylbenzoyl)-6-(thiophen-2-yl)-2-(*p*-tolyl)-3a,4,6,6a-tetrahydro-1*H*-spiro[cyclopenta[*c*]pyrrole-5,2'-indene]-1,1',3,3'(2*H*)-tetraone (3p)**

Yield: 116 mg (82%) as white solid; mp: 245–247 °C.

$^1\text{H}$  NMR ( $\text{CDCl}_3$ , 500 MHz)  $\delta$ : 7.77–7.74 (m, 1H), 7.69–7.65 (m, 2H), 7.64–7.58 (m, 3H), 7.29–7.26 (m, 2H), 7.25–7.21 (m, 2H), 7.06 (dd,  $J = 8.5, 0.5$  Hz, 2H), 6.95 (dd,  $J = 5.1, 1.2$  Hz, 1H), 6.90–6.88 (m, 1H), 6.70 (dd,  $J = 5.1, 3.6$  Hz, 1H), 4.76 (d,  $J = 7.9$  Hz, 1H,  $\text{H}_a$ ), 4.55 (dd,  $J = 9.5, 7.9$  Hz, 1H,  $\text{H}_c$ ), 4.44 (dd,  $J = 11.1, 9.5$  Hz, 1H,  $\text{H}_d$ ), 4.09 (d,  $J = 11.1$  Hz, 1H,  $\text{H}_b$ ), 2.39 (s, 3H), 2.28 (s, 3H) ppm;  $^{13}\text{C}$  NMR ( $\text{CDCl}_3$ , 125 MHz):  $\delta$  199.3, 199.2, 195.8, 176.3, 174.5, 144.7, 142.6, 141.6, 138.8, 136.2, 136.1, 135.48, 135.41, 133.3, 129.9, 129.89, 129.86, 129.5, 129.2, 129.0, 128.9, 128.5, 127.3, 126.9, 126.2, 125.3, 124.2, 123.1, 123.0, 69.6, 56.3, 51.6, 50.5, 46.7, 21.6, 21.3 ppm.

HRMS (ESI):  $m/z$  calcd for  $\text{C}_{34}\text{H}_{26}\text{NO}_5\text{S}$  [ $\text{M} + \text{H}$ ] $^+$ : 560.1526; found: 560.1530.

**(3a*S*,4*S*,6*R*,6a*R*)-4-(4-Bromobenzoyl)-6-(furan-2-yl)-2-(*p*-tolyl)-3a,4,6,6a-tetrahydro-1*H*-spiro[cyclopenta[*c*]pyrrole-5,2'-indene]-1,1',3,3'(2*H*)-tetraone (3q)**

Yield: 110 mg (73%) as white solid; mp: 233–235 °C.

$^1\text{H}$  NMR ( $\text{CDCl}_3$ , 500 MHz)  $\delta$ : 7.78 (dd,  $J = 8.5, 0.5$  Hz, 2H), 7.74–7.69 (m, 2H), 7.63–7.56 (m, 2H), 7.29–7.44–7.41(m, 2H), 7.30 (d,  $J = 8.1, 2\text{H}$ ), 7.23 (d,  $J = 8.3, 2\text{H}$ ), 6.90 (d,  $J = 1.1$  Hz, 1H), 6.29 (d,  $J = 3.3$  Hz, 1H), 6.07 (dd,  $J = 3.3, 1.8$  Hz, 1H), 4.69 (d,  $J = 7.9$  Hz, 1H,  $\text{H}_a$ ), 4.50 (dd,  $J = 9.5, 7.9$  Hz, 1H,  $\text{H}_c$ ), 4.35 (dd,  $J = 11.0, 9.6$  Hz, 1H,  $\text{H}_d$ ), 4.06 (d,  $J = 11.1$  Hz, 1H,  $\text{H}_b$ ), 2.40 (s, 3H) ppm;  $^{13}\text{C}$  NMR ( $\text{CDCl}_3$ , 125 MHz):  $\delta$  198.6, 195.7, 176.3, 174.4, 147.7, 142.5, 141.9, 141.3, 139.0, 136.1, 135.5, 134.6, 131.8, 130.3, 129.9, 129.0, 128.8, 126.27, 126.26, 123.3, 123.0, 110.5, 109.4, 68.2, 56.1, 49.5, 48.2, 46.7, 21.3 ppm.

HRMS (ESI):  $m/z$  calcd for  $\text{C}_{33}\text{H}_{23}\text{NO}_6\text{Br}$  [ $\text{M} + \text{H}$ ] $^+$ : 608.0703; found: 608.0705.

**(3a*S*,4*S*,6*R*,6a*S*)-4-(4-Bromobenzoyl)-6-(thiophen-2-yl)-2-(*p*-tolyl)-3a,4,6,6a-tetrahydro-1*H*-spiro[cyclopenta[*c*]pyrrole-5,2'-indene]-1,1',3,3'(2*H*)-tetraone (3r)**

Yield: 118 mg (76%) as white solid; mp: 156–158 °C.

$^1\text{H}$  NMR ( $\text{CDCl}_3$ , 500 MHz)  $\delta$ :  $^1\text{H}$  NMR ( $\text{CDCl}_3$ , 500 MHz)  $\delta$ : 7.97 (dd,  $J = 6.9, 0.8$  Hz, 1H), 7.83–7.79 (m, 1H), 7.74–7.71 (m, 2H), 7.33 (s, 1H), 7.32 (d,  $J = 2.0, 1\text{H}$ ), 7.27 (t,  $J = 2.2$  Hz, 3H), 7.25 (s, 1H), 7.23

(d,  $J = 2.0$ , 1H), 7.21 (d,  $J = 1.8$ , 1H), 7.13 (dd,  $J = 5.1$ , 1.0 Hz, 1H), 6.93–6.92 (m, 1H), 6.81 (dd,  $J = 5.1$ , 3.5 Hz, 1H), 4.92 (dd,  $J = 11.9$ , 8.8 Hz, 1H, H<sub>a</sub>), 4.72 (d,  $J = 11.9$  Hz, 1H, H<sub>c</sub>), 4.16 (d,  $J = 10.4$  Hz, 1H, H<sub>d</sub>), 3.93–3.89 (m, 1H, H<sub>b</sub>), 2.37 (s, 3H) ppm; <sup>13</sup>C NMR (CDCl<sub>3</sub>, 125 MHz):  $\delta$  198.6, 198.4, 195.0, 175.1, 173.9, 142.4, 141.7, 141.0, 139.0, 136.7, 135.9, 134.8, 131.8, 129.9, 129.6, 129.3, 129.0, 127.5, 126.76, 126.71, 124.7, 123.7, 123.6, 64.7, 63.3, 52.0, 49.8, 46.0, 21.3 ppm.

HRMS (ESI):  $m/z$  calcd for C<sub>33</sub>H<sub>23</sub>NO<sub>5</sub>Br [M + H]<sup>+</sup>: 624.0475; found: 624.0388.

**(Z)-3-Benzylidene-4-((3-methyl-5-oxo-1-phenyl-4,5-dihydro-1H-pyrazol-4-yl)(phenyl)methyl)-1-phenylpyrrolidine-2,5-dione (5a)**

Yield: 107 mg (82%) as white solid; mp: 110–112 °C.

<sup>1</sup>H NMR (CDCl<sub>3</sub>, 500 MHz)  $\delta$ : 11.68 (s, 1H, OH), 7.98 (d,  $J = 1.7$  Hz, 1H), 7.91 (d,  $J = 7.7$  Hz, 2H), 7.68–7.65 (m, 3H), 7.54 (d,  $J = 6.0$  Hz, 4H), 7.46 (t,  $J = 8.0$  Hz, 3H), 7.36–7.34 (m, 4H), 7.13 (dd,  $J = 6.5$ , 2.8 Hz, 2H), 6.62–6.59 (m, 2H), 4.76 (s, 1H, H<sub>a</sub>), 4.56 (s, 1H, H<sub>b</sub>), 1.74 (s, 3H) ppm; <sup>13</sup>C NMR (CDCl<sub>3</sub>, 125 MHz):  $\delta$  180.0, 168.9, 150.5, 147.4, 139.1, 138.1, 137.1, 132.7, 131.27, 130.7, 129.6, 129.2, 129.1, 128.7, 128.6, 128.5, 127.8, 127.2, 126.3, 125.6, 121.8, 115.0, 98.7, 77.2, 76.7, 49.0, 41.8, 12.6 ppm.

HRMS (ESI):  $m/z$  calcd for C<sub>34</sub>H<sub>27</sub>N<sub>3</sub>O<sub>3</sub>Na [M + Na]<sup>+</sup>: 548.1945; found: 548.1952.

**(Z)-3-Benzylidene-4-((2-methoxyphenyl)(3-methyl-5-oxo-1-phenyl-4,5-dihydro-1H-pyrazol-4-yl)methyl)-1-phenylpyrrolidine-2,5-dione (5b)**

Yield: 108 mg (78%) as white solid; mp: 104–106 °C.

<sup>1</sup>H NMR (CDCl<sub>3</sub>, 500 MHz)  $\delta$ : 11.57 (s, 1H, OH), 7.92 (d,  $J = 7.8$  Hz, 2H), 7.78 (d,  $J = 1.2$  Hz, 1H), 7.64 (d,  $J = 6.9$  Hz, 2H), 7.52–7.44 (m, 6H), 7.36–7.34 (m, 3H), 7.25–7.21 (m, 1H), 7.16 (d,  $J = 7.6$  Hz, 1H), 6.90 (t,  $J = 7.4$  Hz, 1H), 6.78 (d,  $J = 8.2$  Hz, 1H), 6.63 (dd,  $J = 6.6$ , 2.8 Hz, 2H), 5.13 (s, 1H, H<sub>a</sub>), 4.71 (s, 1H, H<sub>b</sub>), 3.63 (s, 3H), 1.82 (s, 3H) ppm; <sup>13</sup>C NMR (CDCl<sub>3</sub>, 125 MHz):  $\delta$  180.3, 169.3, 156.6, 150.7, 147.2, 139.2, 134.8, 133.4, 131.3, 130.9, 130.6, 130.5, 129.4, 129.1, 129.0, 128.8, 127.9, 126.4, 126.3, 125.6, 121.7, 120.8, 110.0, 100.1, 54.8, 49.5, 35.0, 12.5 ppm.

HRMS (ESI):  $m/z$  calcd for  $C_{35}H_{30}N_3O_4$   $[M + H]^+$ : 556.2231; found: 556.2257.

**(Z)-3-(4-Methoxybenzylidene)-4-((2-methoxyphenyl)(3-methyl-5-oxo-1-phenyl-4,5-dihydro-1H-pyrazol-4-yl)methyl)-1-phenylpyrrolidine-2,5-dione (5c)**

Yield: 112 mg (77%) as white solid; mp: 195–197 °C.

$^1H$  NMR ( $CDCl_3$ , 500 MHz)  $\delta$ : 11.76 (s, 1H, OH), 7.93 (d,  $J=8.3$  Hz, 2H), 7.72 (s, 1H), 7.59 (d,  $J=8.6$  Hz, 2H), 7.46 (t,  $J=7.9$  Hz, 3H), 7.35–7.33 (m, 2H), 7.25–7.21 (m, 2H), 7.16 (d,  $J=7.7$  Hz, 1H), 7.01 (d,  $J=8.6$  Hz, 2H), 6.89 (t,  $J=7.5$  Hz, 1H), 6.78 (d,  $J=8.2$  Hz, 1H), 6.65–6.61 (m, 2H), 5.19 (s, 1H,  $H_a$ ), 4.64 (s, 1H,  $H_b$ ), 3.85 (s, 3H), 3.61 (s, 3H), 1.89 (s, 3H) ppm;  $^{13}C$  NMR ( $CDCl_3$ , 125 MHz):  $\delta$  180.5, 169.5, 161.6, 156.7, 150.9, 147.4, 139.1, 134.7, 132.6, 131.3, 131.0, 129.1, 128.9, 128.8, 128.7, 126.5, 126.4, 126.0, 125.7, 124.8, 121.7, 120.8, 119.0, 115.0, 114.3, 110.0, 100.2, 55.6, 54.9, 49.4, 34.5, 12.6 ppm.

HRMS (ESI):  $m/z$  calcd for  $C_{36}H_{31}N_3O_5Na$   $[M + Na]^+$ : 608.2156; found: 608.2162.

**(Z)-3-(2,6-Dimethoxybenzylidene)-1-(3,5-dimethylphenyl)-4-((2-methoxyphenyl)(3-methyl-5-oxo-1-phenyl-4,5-dihydro-1H-pyrazol-4-yl)methyl)pyrrolidine-2,5-dione (5d)**

Yield: 111 mg (69%) as white solid; mp: 210–212 °C.

$^1H$  NMR ( $CDCl_3$ , 500 MHz)  $\delta$ : 11.53 (s, 1H, OH), 8.13 (d,  $J=1.8$  Hz, 1H), 7.84 (d,  $J=7.7$  Hz, 2H), 7.44 (t,  $J=7.9$  Hz, 2H), 7.25–7.20 (m, 2H), 7.15–7.12 (m, 1H), 7.05 (d,  $J=2.7$  Hz, 1H), 7.00 (dd,  $J=9.0, 2.9$  Hz, 1H), 6.97–6.92 (m, 2H), 6.89 (t,  $J=7.4$  Hz, 1H), 6.79 (d,  $J=8.1$  Hz, 1H), 6.16 (s, 2H), 4.96 (s, 1H,  $H_a$ ), 4.76 (s, 1H,  $H_b$ ), 3.83 (s, 3H), 3.66 (s, 3H), 3.55 (s, 3H), 2.25 (s, 6H), 1.67 (s, 3H) ppm;  $^{13}C$  NMR ( $CDCl_3$ , 125 MHz):  $\delta$  180.6, 169.4, 156.8, 153.6, 152.9, 150.5, 147.3, 139.2, 138.9, 131.4, 130.8, 130.2, 128.8, 128.5, 128.1, 126.7, 125.6, 124.1, 122.8, 121.8, 120.6, 118.4, 113.7, 112.6, 110.0, 100.6, 55.8, 55.5, 54.7, 49.6, 34.9, 21.1, 12.2 ppm.

HRMS (ESI):  $m/z$  calcd for  $C_{39}H_{37}N_3O_6Na$   $[M + Na]^+$ : 666.2575; found: 666.2576.

**(Z)-3-(4-Methoxybenzylidene)-4-((3-methyl-5-oxo-1-phenyl-4,5-dihydro-1H-pyrazol-4-yl)(phenyl)methyl)-1-phenylpyrrolidine-2,5-dione (5e)**

Yield: 111 mg (80%) as white solid; mp: 178–180 °C.

$^1\text{H}$  NMR ( $\text{CDCl}_3$ , 500 MHz)  $\delta$ : 11.80 (s, 1H, OH), 7.93–7.90 (m, 3H), 7.61 (d,  $J = 8.7$  Hz, 2H), 7.46 (t,  $J = 7.9$  Hz, 3H), 7.35–7.33 (m, 3H), 7.27 (d,  $J = 7.1$  Hz, 2H), 7.25 (s, 1H), 7.14 (dd,  $J = 6.3, 2.6$  Hz, 2H), 7.04 (d,  $J = 8.7$  Hz, 2H), 6.59 (dd,  $J = 6.3, 3.0$  Hz, 2H), 4.68 (s, 1H,  $\text{H}_a$ ), 4.60 (s, 1H,  $\text{H}_b$ ), 3.87 (s, 3H), 1.83 (s, 3H) ppm;  $^{13}\text{C}$  NMR ( $\text{CDCl}_3$ , 125 MHz):  $\delta$  180.1, 169.2, 162.1, 150.6, 147.5, 139.1, 138.2, 136.7, 133.0, 132.2, 130.8, 129.1, 128.8, 128.6, 128.6, 127.8, 126.5, 126.3, 125.7, 125.3, 123.9, 121.7, 115.2, 114.7, 98.8, 55.6, 49.0, 41.5, 12.8 ppm.

HRMS (ESI):  $m/z$  calcd for  $\text{C}_{33}\text{H}_{30}\text{N}_3\text{O}_4$  [ $\text{M} + \text{H}$ ] $^+$ : 556.2231; found: 556.2031.

**(Z)-3-((2,5-Dimethoxyphenyl) (3-methyl-5-oxo-1-phenyl-4,5-dihydro-1H-pyrazol-4-yl)methyl)-4-(4-methoxybenzylidene)-1-phenylpyrrolidine-2,5-dione (5f)**

Yield: 125 mg (81%) as white solid; mp: 188–190 °C.

$^1\text{H}$  NMR ( $\text{CDCl}_3$ , 500 MHz)  $\delta$ : 11.68 (s, 1H, OH), 7.91 (d,  $J = 7.7$  Hz, 2H), 7.72 (d,  $J = 1.4$  Hz, 1H), 7.58 (d,  $J = 8.8$  Hz, 2H), 7.45 (t,  $J = 8.0$  Hz, 2H), 7.37 (td,  $J = 4.8, 2.5$  Hz, 3H), 7.01 (d,  $J = 8.7$  Hz, 2H), 6.72 (qd,  $J = 8.7, 5.6$  Hz, 6H), 5.17 (s, 1H,  $\text{H}_a$ ), 4.65 (s, 1H,  $\text{H}_b$ ), 3.86 (s, 3H), 3.63 (s, 3H), 3.57 (s, 3H), 1.88 (s, 3H) ppm;  $^{13}\text{C}$  NMR ( $\text{CDCl}_3$ , 125 MHz):  $\delta$  180.5, 169.5, 161.5, 153.5, 150.8, 150.6, 147.4, 139.1, 134.9, 132.6, 131.1, 129.0, 128.9, 128.8, 127.7, 126.4, 126.0, 125.6, 124.5, 121.7, 117.4, 115.0, 113.2, 110.9, 100.0, 55.7, 55.5, 55.3, 49.3, 34.6, 12.7 ppm.

HRMS (ESI):  $m/z$  calcd for  $\text{C}_{37}\text{H}_{33}\text{N}_3\text{O}_6\text{Na}$  [ $\text{M} + \text{Na}$ ] $^+$ : 638.2262; found: 638.2265.

**(Z)-3-Benzylidene-4-((3-bromophenyl) (3-methyl-5-oxo-1-phenyl-4,5-dihydro-1H-pyrazol-4-yl)-methyl)-1-phenylpyrrolidine-2,5-dione (5g)**

Yield: 130 mg (86%) as white solid; mp: 126–128 °C.

$^1\text{H}$  NMR ( $\text{CDCl}_3$ , 500 MHz)  $\delta$ : 11.65 (s, 1H, OH), 7.99 (s, 1H), 7.91 (d,  $J = 8.0$ , 2H), 7.64 (d,  $J = 4.3$ , 2H), 7.53 (d,  $J = 4.5$ , 2H), 7.46 (t,  $J = 7.7$ , 3H), 7.40 (d,  $J = 10.7$ , 4H), 7.28 (d,  $J = 7.1$ , 2H), 7.12 (t,  $J = 7.8$ , 1H), 7.04 (d,  $J = 7.7$ , 1H), 6.74 (d,  $J = 7.4$ , 2H), 4.76 (s, 1H,  $\text{H}_a$ ), 4.51 (s, 1H,  $\text{H}_b$ ), 1.74 (s, 3H) ppm;  $^{13}\text{C}$  NMR

(CDCl<sub>3</sub>, 125 MHz):  $\delta$  179.7, 168.6, 150.4, 147.4, 140.6, 138.9, 137.6, 132.5, 131.4, 131.3, 131.1, 130.8, 130.6, 130.2, 129.7, 129.3, 128.8, 127.2, 126.5, 126.2, 125.8, 122.8, 121.8, 98.1, 48.7, 41.2, 12.7 ppm.

HRMS (ESI):  $m/z$  calcd for C<sub>34</sub>H<sub>27</sub>N<sub>3</sub>O<sub>3</sub>Br [M + H]<sup>+</sup>: 604.1230; found: 604.1271.

**(Z)-3-(Furan-2-ylmethylene)-4-((3-methyl-5-oxo-1-phenyl-4,5-dihydro-1H-pyrazol-4-yl)(phenyl)methyl)-1-phenylpyrrolidine-2,5-dione (5h)**

Yield: 106 mg (82%) as white solid; mp: 198–200 °C.

<sup>1</sup>H NMR (CDCl<sub>3</sub>, 500 MHz)  $\delta$ : 11.70 (s, 1H, OH), 7.91 (d,  $J$  = 8.0 Hz, 2H), 7.67 (s, 1H), 7.64 (s, 1H), 7.44 (t,  $J$  = 7.9 Hz, 2H), 7.33–7.30 (m, 3H), 7.24 (dd,  $J$  = 10.8, 5.3 Hz, 4H), 7.18–7.15 (m, 2H), 6.93 (d,  $J$  = 3.1, 1H), 6.61 (d,  $J$  = 1.4 Hz, 1H), 6.59–6.55 (m, 2H), 4.70 (s, 1H, H<sub>a</sub>), 4.67 (s, 1H, H<sub>b</sub>), 1.91 (s, 3H) ppm; <sup>13</sup>C NMR (CDCl<sub>3</sub>, 125 MHz):  $\delta$  180.1, 168.7, 150.3, 149.9, 147.6, 147.3, 139.2, 138.3, 130.7, 129.13, 129.10, 128.8, 128.6, 128.6, 127.7, 126.3, 125.6, 124.4, 122.4, 121.8, 119.3, 115.0, 114.9, 113.4, 99.4, 77.3, 77.0, 76.8, 49.6, 43.8, 12.8 ppm.

HRMS (ESI):  $m/z$  calcd for C<sub>32</sub>H<sub>25</sub>N<sub>3</sub>O<sub>4</sub>Na [M + Na]<sup>+</sup>: 538.1737; found: 538.1740.

**(Z)-3-(Furan-2-ylmethylene)-4-((3-methyl-5-oxo-1-phenyl-4,5-dihydro-1H-pyrazol-4-yl)(phenyl)methyl)-1-(*p*-tolyl)pyrrolidine-2,5-dione (5i)**

Yield: 105 mg (80%) as white solid; mp: 101–103 °C.

<sup>1</sup>H NMR (CDCl<sub>3</sub>, 500 MHz)  $\delta$ : 11.73 (s, 1H, OH), 7.91 (d,  $J$  = 7.7 Hz, 2H), 7.68 (dd,  $J$  = 7.1, 1.4 Hz, 2H), 7.45 (t,  $J$  = 8.0 Hz, 2H), 7.27 (s, 1H), 7.25 (s, 2H), 7.15 (m, 5H), 6.95 (d,  $J$  = 3.5 Hz, 1H), 6.64 (m, 1H), 6.45 (d,  $J$  = 8.2 Hz, 2H), 4.70 (s, 1H, H<sub>a</sub>), 4.67 (s, 1H, H<sub>b</sub>), 2.32 (s, 3H), 1.92 (s, 3H) ppm; <sup>13</sup>C NMR (CDCl<sub>3</sub>, 125 MHz):  $\delta$  180.2, 168.8, 150.4, 150.0, 147.6, 147.2, 139.28, 139.21, 138.4, 129.7, 128.7, 128.66, 128.61, 128.0, 127.7, 126.1, 125.6, 124.5, 122.2, 121.8, 119.2, 113.3, 99.5, 49.6, 43.7, 21.2, 12.8 ppm.

HRMS (ESI):  $m/z$  calcd for C<sub>33</sub>H<sub>27</sub>N<sub>3</sub>O<sub>4</sub>Na [M + Na]<sup>+</sup>: 552.1894; found: 552.1899.

**(Z)-3-((3-Methyl-5-oxo-1-phenyl-4,5-dihydro-1H-pyrazol-4-yl)(phenyl)methyl)-4-(thiophen-2-**

**ylmethylene)-1-(*p*-tolyl)pyrrolidine-2,5-dione (5j)**

Yield: 117 mg (86%) as white solid; mp: 117–119 °C.

<sup>1</sup>H NMR (CDCl<sub>3</sub>, 500 MHz) δ: 11.66 (s, 1H, OH), 8.10 (s, 1H), 7.92 (d, *J* = 8.0 Hz, 2H), 7.69 (d, *J* = 5.0 Hz, 1H), 7.53 (d, *J* = 3.4 Hz, 1H), 7.46 (t, *J* = 7.9 Hz, 2H), 7.28 (dd, *J* = 7.9, 6.6 Hz, 3H), 7.25 (d, *J* = 3.4 Hz, 1H), 7.17–7.14 (m, 4H), 7.13 (d, *J* = 7.8 Hz, 1H), 6.44 (d, *J* = 8.1 Hz, 2H), 4.70 (s, 1H, H<sub>a</sub>), 4.61 (s, 1H, H<sub>b</sub>), 2.33 (s, 3H), 1.89 (s, 3H) ppm; <sup>13</sup>C NMR (CDCl<sub>3</sub>, 125 MHz): δ 179.8, 168.8, 150.4, 147.7, 139.3, 139.1, 138.2, 136.6, 134.5, 132.8, 129.8, 129.79, 129.0, 128.9, 128.8, 128.75, 128.71, 128.3, 128.0, 127.8, 126.2, 126.1, 125.6, 124.5, 121.8, 115.0, 99.0, 48.7, 42.6, 21.2, 13.0 ppm.

HRMS (ESI): *m/z* calcd for C<sub>33</sub>H<sub>28</sub>N<sub>3</sub>O<sub>3</sub>S [M + H]<sup>+</sup>: 546.1846; found: 546.1694.

**(*Z*)-3-(Furan-2-ylmethylene)-4-((2-methoxyphenyl)(3-methyl-5-oxo-1-phenyl-4,5-dihydro-1*H*-pyrazol-4-yl)methyl)-1-phenylpyrrolidine-2,5-dione(5k)**

Yield: 106 mg (78%) as white solid; mp: 110–112 °C.

<sup>1</sup>H NMR (CDCl<sub>3</sub>, 500 MHz) δ: 11.57 (s, 1H, OH), 7.92 (d, *J* = 8.4 Hz, 2H), 7.60 (s, 1H), 7.53 (s, 1H), 7.45 (t, *J* = 7.9 Hz, 2H), 7.35–7.33 (m, 1H), 7.33 (d, *J* = 2.2 Hz, 2H), 7.25–7.21 (m, 2H), 7.17 (d, *J* = 7.6 Hz, 1H), 6.89 (d, *J* = 7.5 Hz, 1H), 6.86 (d, *J* = 3.3 Hz, 1H), 6.79 (d, *J* = 8.2 Hz, 1H), 6.62–6.59 (m, 3H), 5.22 (s, 1H, H<sub>a</sub>), 4.69 (s, 1H, H<sub>b</sub>), 3.64 (s, 3H), 1.96 (s, 3H) ppm; <sup>13</sup>C NMR (CDCl<sub>3</sub>, 125 MHz): δ 180.5, 169.0, 156.7, 150.6, 150.5, 147.4, 146.6, 139.2, 131.3, 130.9, 129.0, 128.9, 128.8, 128.7, 126.8, 126.3, 125.6, 125.5, 121.7, 120.8, 120.3, 119.0, 117.8, 115.0, 113.0, 109.9, 100.9, 54.8, 50.0, 36.4, 12.7 ppm.

HRMS (ESI): *m/z* calcd for C<sub>33</sub>H<sub>27</sub>N<sub>3</sub>O<sub>5</sub>Na [M + Na]<sup>+</sup>: 568.1843; found: 568.1849.

**(*Z*)-3-(Furan-2-ylmethylene)-4-((2-methoxyphenyl)(3-methyl-5-oxo-1-phenyl-4,5-dihydro-1*H*-pyrazol-4-yl)methyl)-1-(*p*-tolyl)pyrrolidine-2,5-dione (5l)**

Yield: 116 mg (83%) as white solid; mp: 102–104 °C.

<sup>1</sup>H NMR (CDCl<sub>3</sub>, 500 MHz) δ: 11.59 (s, 1H, OH), 7.92 (d, *J* = 7.7 Hz, 2H), 7.60 (s, 1H), 7.52 (d, *J* = 1.4 Hz, 1H), 7.45 (t, *J* = 8.0 Hz, 2H), 7.26–7.20 (m, 3H), 7.17–7.12 (m, 3H), 6.88 (d, *J* = 7.1 Hz, 1H), 6.85 (d,

$J = 3.3$  Hz, 1H), 6.79 (d,  $J = 8.1$  Hz, 1H), 6.60 (dd,  $J = 3.2, 1.7$  Hz, 1H), 6.49 (d,  $J = 8.2$  Hz, 1H), 5.22 (s, 1H, H<sub>a</sub>), 4.68 (s, 1H, H<sub>b</sub>), 3.64 (s, 3H), 2.33 (s, 3H), 1.95 (s, 3H) ppm; <sup>13</sup>C NMR (CDCl<sub>3</sub>, 125 MHz):  $\delta$  180.5, 169.1, 156.7, 150.6, 150.5, 147.4, 146.4, 139.3, 139.0, 131.3, 129.7, 128.7, 128.6, 128.3, 126.8, 126.1, 125.7, 125.4, 121.6, 120.8, 120.1, 117.6, 113.0, 109.9, 100.8, 54.8, 50.0, 36.3, 21.1, 12.6 ppm.

HRMS (ESI):  $m/z$  calcd for C<sub>34</sub>H<sub>30</sub>N<sub>3</sub>O<sub>5</sub> [M + H]<sup>+</sup>: 560.2180; found: 560.2183.

**(Z)-3-((2,5-Dimethoxyphenyl)(3-methyl-5-oxo-1-phenyl-4,5-dihydro-1H-pyrazol-4-yl)methyl)-4-(furan-2-ylmethylene)-1-phenylpyrrolidine-2,5-dione (5m)**

Yield: 109 mg (76%) as white solid; mp: 101–103 °C.

<sup>1</sup>H NMR (CDCl<sub>3</sub>, 500 MHz)  $\delta$ : 11.53 (s, 1H, OH), 7.90 (d,  $J = 7.9$  Hz, 2H), 7.61 (s, 1H), 7.52 (s, 1H), 7.44 (t,  $J = 7.9$  Hz, 2H), 7.38–7.35 (m, 1H), 7.35 (d,  $J = 1.1$  Hz, 2H), 7.24 (d,  $J = 7.4$  Hz, 1H), 6.86 (d,  $J = 3.3$  Hz, 1H), 6.76–6.68 (m, 5H), 6.61–6.59 (m, 1H), 5.21 (s, 1H, H<sub>a</sub>), 4.68 (s, 1H, H<sub>b</sub>), 3.63 (s, 3H), 3.59 (s, 3H), 1.95 (s, 3H) ppm; <sup>13</sup>C NMR (CDCl<sub>3</sub>, 125 MHz):  $\delta$  180.5, 169.0, 153.6, 150.8, 150.4, 147.5, 146.6, 139.2, 131.0, 129.0, 128.9, 128.7, 127.9, 126.3, 125.5, 125.2, 121.7, 120.5, 117.8, 117.3, 113.1, 113.0, 110.8, 100.7, 55.7, 55.2, 49.9, 36.4, 12.7 ppm.

HRMS (ESI):  $m/z$  calcd for C<sub>34</sub>H<sub>29</sub>N<sub>3</sub>O<sub>6</sub>Na [M + Na]<sup>+</sup>: 598.1949; found: 598.1952.

**(Z)-3-((2,5-Dimethoxyphenyl)(3-methyl-5-oxo-1-phenyl-4,5-dihydro-1H-pyrazol-4-yl)methyl)-4-(furan-2-ylmethylene)-1-(p-tolyl)pyrrolidine-2,5-dione (5n)**

Yield: 106 mg (72%) as white solid; mp: 102–104 °C.

<sup>1</sup>H NMR (CDCl<sub>3</sub>, 500 MHz)  $\delta$ : 11.58 (s, 1H, OH), 7.90 (d,  $J = 7.8$  Hz, 2H), 7.60 (s, 1H), 7.50 (d,  $J = 1.3$  Hz, 1H), 7.43 (d,  $J = 8.1$  Hz, 2H), 7.24 (d,  $J = 7.4$  Hz, 1H), 7.16 (d,  $J = 8.1$  Hz, 2H), 6.85 (d,  $J = 3.4$  Hz, 1H), 6.75–6.70 (m, 3H), 6.61–6.56 (m, 3H), 5.20 (s, 1H, H<sub>a</sub>), 4.67 (s, 1H, H<sub>b</sub>), 3.64 (s, 3H), 3.59 (s, 3H), 2.34 (s, 3H), 1.95 (s, 3H) ppm; <sup>13</sup>C NMR (CDCl<sub>3</sub>, 125 MHz):  $\delta$  180.6, 169.1, 153.6, 150.8, 150.5, 147.5, 146.5, 139.2, 139.1, 129.7, 128.7, 128.3, 127.9, 126.1, 125.5, 125.3, 121.8, 120.4, 117.7, 117.3, 113.1, 113.0, 110.8, 100.7, 55.7, 55.2, 49.9, 36.3, 21.2, 12.7 ppm.



HRMS (ESI):  $m/z$  calcd for  $C_{35}H_{32}N_3O_6$   $[M + H]^+$ : 590.2286; found: 590.2114.

**(Z)-3-((3-Bromophenyl)(3-methyl-5-oxo-1-phenyl-4,5-dihydro-1H-pyrazol-4-yl)methyl)-4-(furan-2-ylmethylene)-1-phenylpyrrolidine-2,5-dione (5o)**

Yield: 123 mg (83%) as white solid; mp: 168–170 °C.

$^1H$  NMR ( $CDCl_3$ , 500 MHz)  $\delta$ : 11.61 (s, 1H, OH), 7.90 (d,  $J = 7.8$  Hz, 2H), 7.71 (d,  $J = 1.4$  Hz, 1H), 7.67 (s, 1H), 7.46 (t,  $J = 7.9$  Hz, 3H), 7.42–7.38 (m, 3H), 7.37 (s, 1H), 7.31 (s, 1H), 7.13 (t,  $J = 7.7$  Hz, 1H), 7.08 (d,  $J = 7.8$  Hz, 1H), 6.98 (d,  $J = 3.4$  Hz, 1H), 6.70 (dd,  $J = 7.6, 1.7$  Hz, 2H), 6.66 (dd,  $J = 3.3, 1.7$  Hz, 1H), 4.73 (s, 1H,  $H_a$ ), 4.64 (s, 1H,  $H_b$ ), 1.91 (s, 3H) ppm;  $^{13}C$  NMR ( $CDCl_3$ , 125 MHz):  $\delta$  179.9, 168.4, 150.2, 149.8, 147.49, 147.45, 140.8, 139.0, 131.3, 130.9, 130.6, 130.2, 129.2, 128.8, 127.3, 126.1, 125.7, 123.7, 122.8, 122.7, 121.8, 119.7, 114.9, 113.5, 98.7, 49.3, 43.4, 12.9 ppm.

HRMS (ESI):  $m/z$  calcd for  $C_{32}H_{24}N_3O_4BrNa$   $[M + Na]^+$ : 616.0842; found: 616.0846.

**(Z)-3-((3-Bromophenyl)(3-methyl-5-oxo-1-phenyl-4,5-dihydro-1H-pyrazol-4-yl)methyl)-4-(furan-2-ylmethylene)-1-(p-tolyl)pyrrolidine-2,5-dione (5p)**

Yield: 120 mg (79%) as white solid; mp: 116–118 °C.

$^1H$  NMR ( $CDCl_3$ , 500 MHz)  $\delta$ : 11.64 (s, 1H, OH), 7.86 (d,  $J = 7.8$  Hz, 2H), 7.63 (d,  $J = 1.5$  Hz, 1H), 7.59 (s, 1H), 7.41–7.38 (m, 2H), 7.22–7.18 (m, 1H), 7.13 (s, 1H), 7.11 (s, 1H), 7.08 (d,  $J = 7.7$  Hz, 1H), 7.06 (s, 1H), 7.03 (dd,  $J = 9.8, 3.2$  Hz, 2H), 6.89 (d,  $J = 3.5$  Hz, 1H), 6.57 (dd,  $J = 3.4, 1.7$  Hz, 1H), 6.53 (d,  $J = 8.3$  Hz, 2H), 4.64 (s, 1H,  $H_a$ ), 4.58 (s, 1H,  $H_b$ ), 2.28 (s, 3H), 1.86 (s, 3H) ppm;  $^{13}C$  NMR ( $CDCl_3$ , 125 MHz):  $\delta$  180.1, 168.6, 150.4, 149.9, 147.6, 147.4, 141.0, 139.4, 139.1, 131.4, 131.0, 130.3, 129.9, 128.94, 128.93, 128.9, 128.8, 128.1, 127.4, 126.0, 125.8, 123.9, 122.9, 122.6, 121.9, 119.7, 113.5, 98.9, 49.4, 43.4, 21.3, 13.0 ppm.

HRMS (ESI):  $m/z$  calcd for  $C_{33}H_{27}N_3O_4Br$   $[M + H]^+$ : 608.1179; found: 608.0943.

**(Z)-3-((3-Bromophenyl)(3-methyl-5-oxo-1-phenyl-4,5-dihydro-1H-pyrazol-4-yl)methyl)-4-(thiophen-2-ylmethylene)-1-(p-tolyl)pyrrolidine-2,5-dione (5q)**

Yield: 133 mg (85%) as white solid; mp: 138–140 °C.

$^1\text{H}$  NMR ( $\text{CDCl}_3$ , 500 MHz)  $\delta$ : 11.61 (s, 1H, OH), 8.12 (s, 1H), 7.90 (dd,  $J = 8.8, 1.1$  Hz, 1H), 7.70 (d,  $J = 5.6$  Hz, 1H), 7.53 (d,  $J = 4.1$  Hz, 1H), 7.48–7.46 (m, 1H), 7.44 (s, 1H), 7.41 (m, 1H), 7.33 (s, 1H), 7.31–7.28 (m, 2H), 7.24 (s, 1H), 7.18 (d,  $J = 8.6$  Hz, 2H), 7.12 (d,  $J = 7.9$  Hz, 1H), 7.07 (dd,  $J = 8.1, 0.9$  Hz, 1H), 6.57 (d,  $J = 8.7$  Hz, 2H), 4.66 (s, 1H,  $\text{H}_a$ ), 4.61 (s, 1H,  $\text{H}_b$ ), 2.35 (s, 3H), 1.88 (s, 3H) ppm;  $^{13}\text{C}$  NMR ( $\text{CDCl}_3$ , 125 MHz):  $\delta$  179.6, 168.6, 150.4, 147.7, 140.8, 139.5, 139.1, 136.5, 134.8, 133.1, 131.6, 131.2, 130.3, 129.9, 129.5, 129.1, 128.94, 128.93, 128.91, 128.8, 128.0, 127.5, 126.0, 125.8, 123.9, 122.9, 121.9, 98.4, 48.5, 42.3, 21.3, 13.1 ppm.

HRMS (ESI):  $m/z$  calcd for  $\text{C}_{33}\text{H}_{27}\text{N}_3\text{O}_3\text{Br}$  [ $\text{M} + \text{H}$ ] $^+$ : 624.0951; found: 624.0746.

**(Z)-3-(Furan-2-ylmethylene)-4-((3-methyl-5-oxo-1-phenyl-4,5-dihydro-1H-pyrazol-4-yl)(thiophen-2-yl)methyl)-1-(p-tolyl)pyrrolidine-2,5-dione (5r)**

Yield: 87 mg (65%) as white solid; mp: 120–122 °C.

$^1\text{H}$  NMR ( $\text{CDCl}_3$ , 500 MHz)  $\delta$ : 11.73 (s, 1H, OH), 7.89 (d,  $J = 7.9$  Hz, 2H), 7.71 (s, 1H), 7.66 (s, 1H), 7.44 (t,  $J = 7.8$  Hz, 2H), 7.24 (d,  $J = 7.5$  Hz, 1H), 7.19 (d,  $J = 8.0$  Hz, 2H), 7.16 (d,  $J = 4.9$  Hz, 1H), 6.94 (d,  $J = 3.2$  Hz, 1H), 6.93–6.90 (m, 1H), 6.82 (d,  $J = 2.9$  Hz, 1H), 6.67 (d,  $J = 8.1$  Hz, 2H), 6.64 (s, 1H), 4.88 (s, 1H,  $\text{H}_a$ ), 4.69 (s, 1H,  $\text{H}_b$ ), 2.35 (s, 3H), 1.98 (s, 3H) ppm;  $^{13}\text{C}$  NMR ( $\text{CDCl}_3$ , 125 MHz):  $\delta$  180.0, 168.8, 149.99, 149.96, 147.4, 147.2, 141.6, 139.3, 139.1, 129.8, 128.7, 128.3, 127.1, 126.5, 126.1, 125.6, 124.8, 124.2, 122.6, 121.8, 119.4, 113.4, 99.8, 49.7, 39.0, 21.2, 12.7 ppm.

HRMS (ESI):  $m/z$  calcd for  $\text{C}_{31}\text{H}_{25}\text{SN}_3\text{O}_4\text{Na}$  [ $\text{M} + \text{Na}$ ] $^+$ : 558.1458; found: 558.1464.

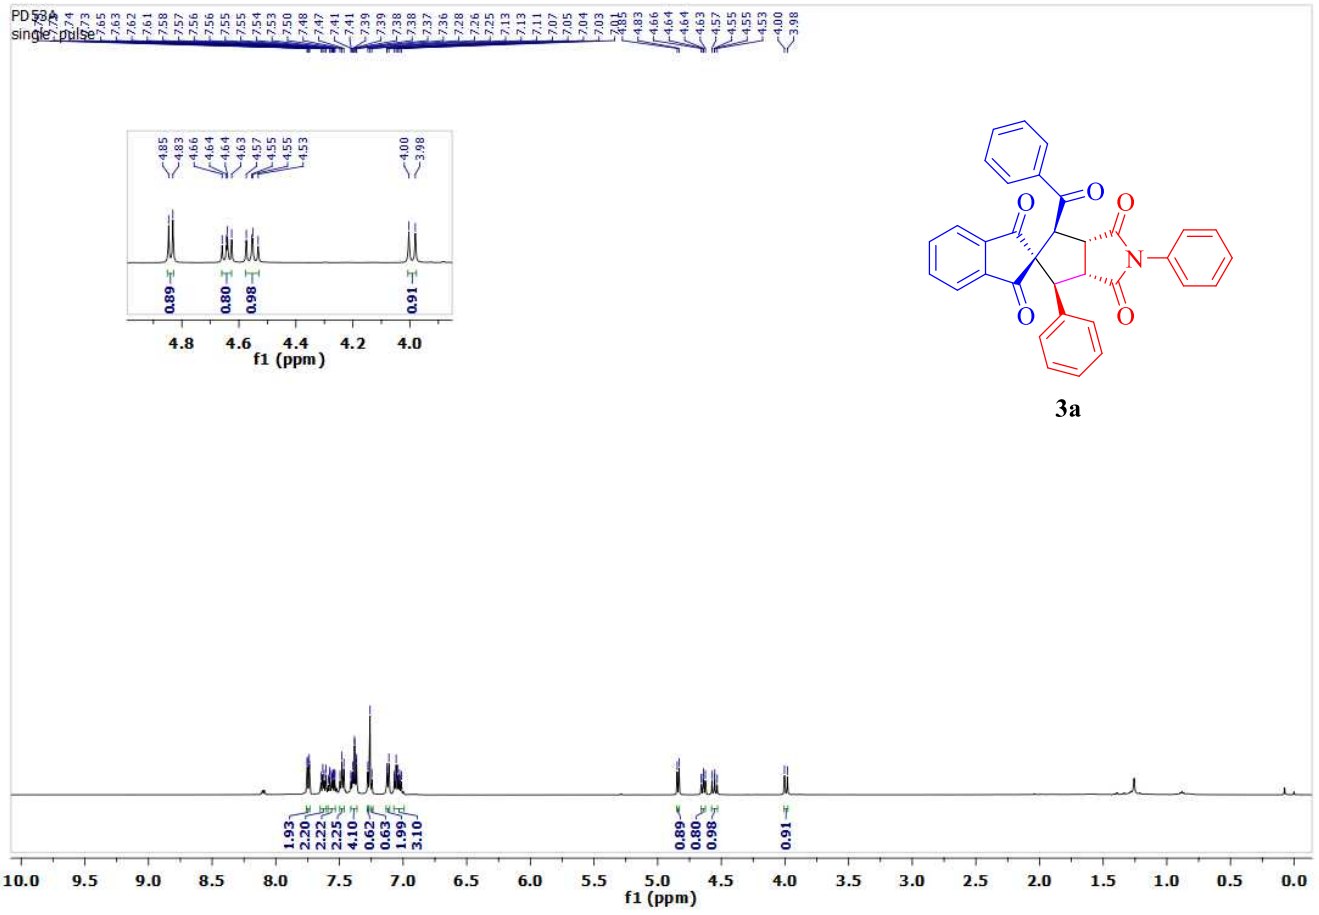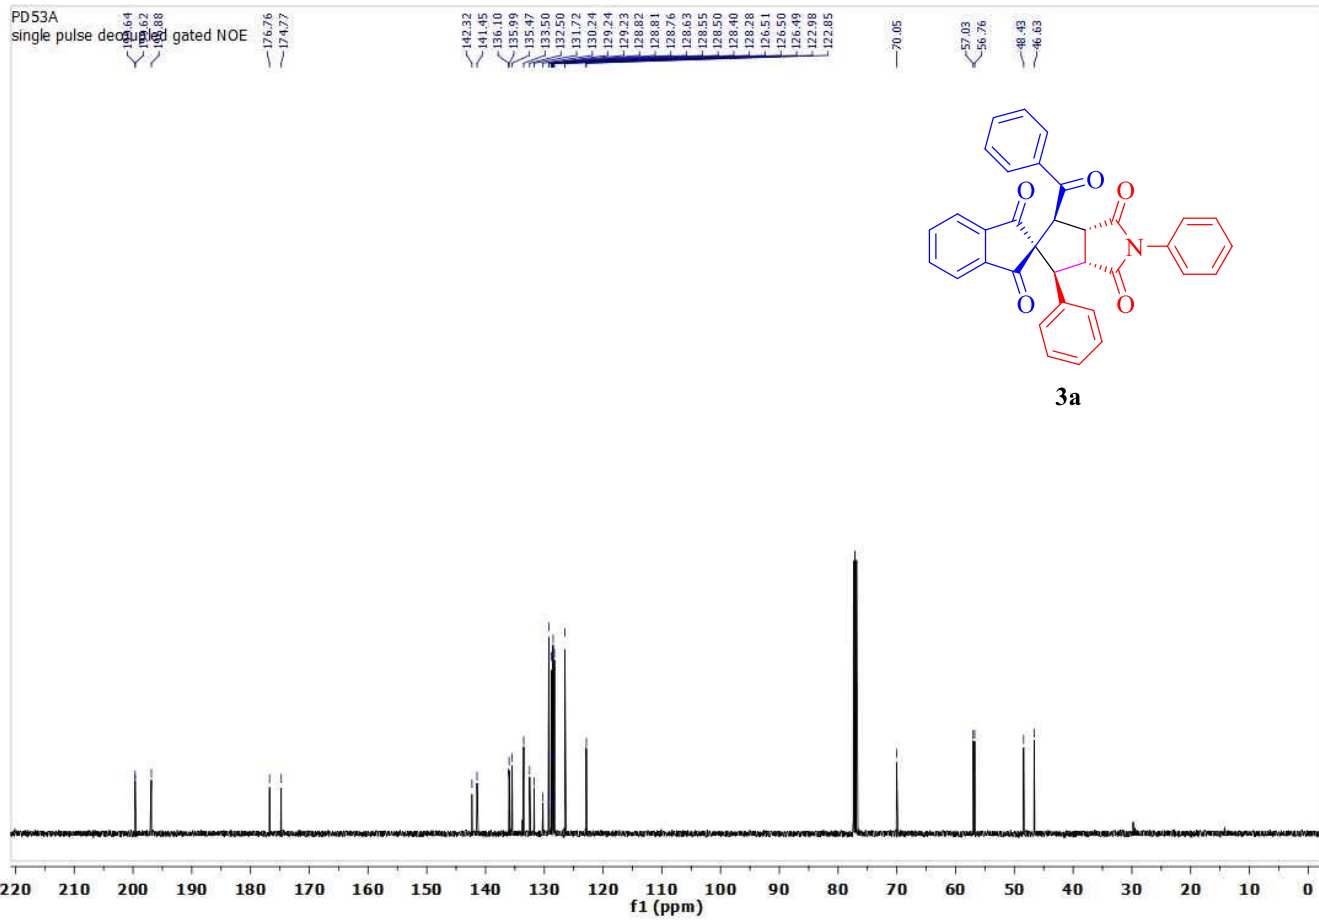

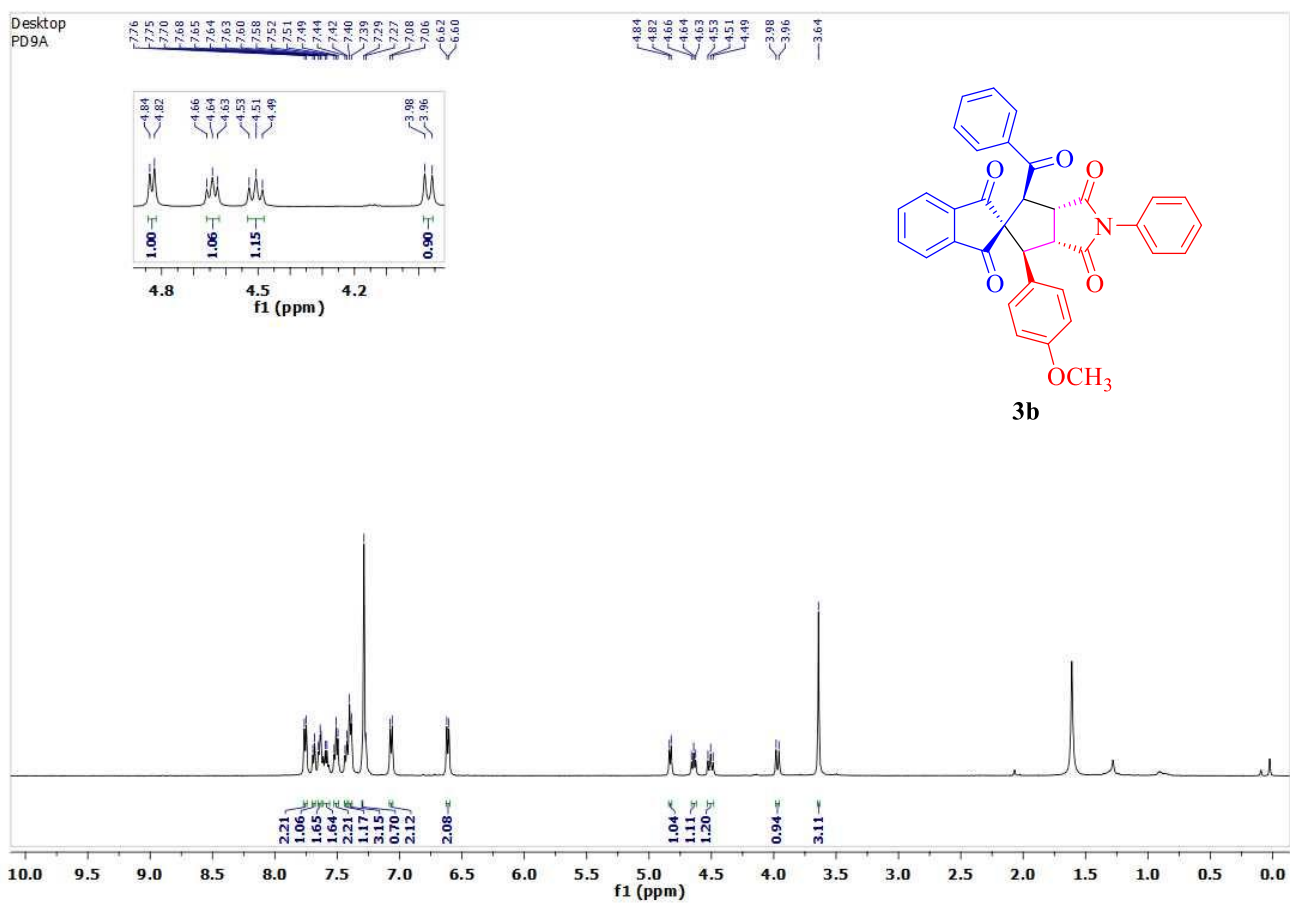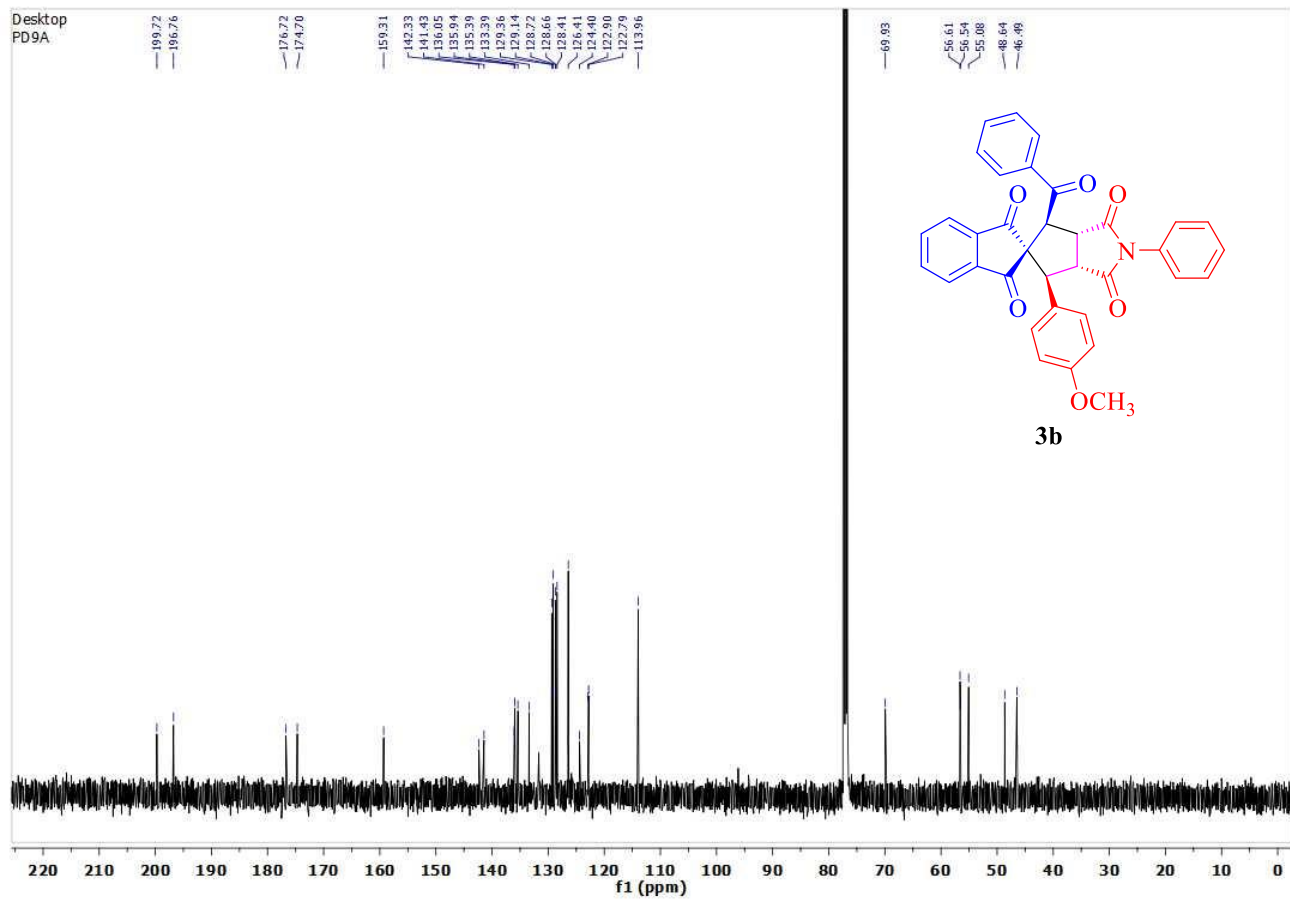

PD60A  
single pulse

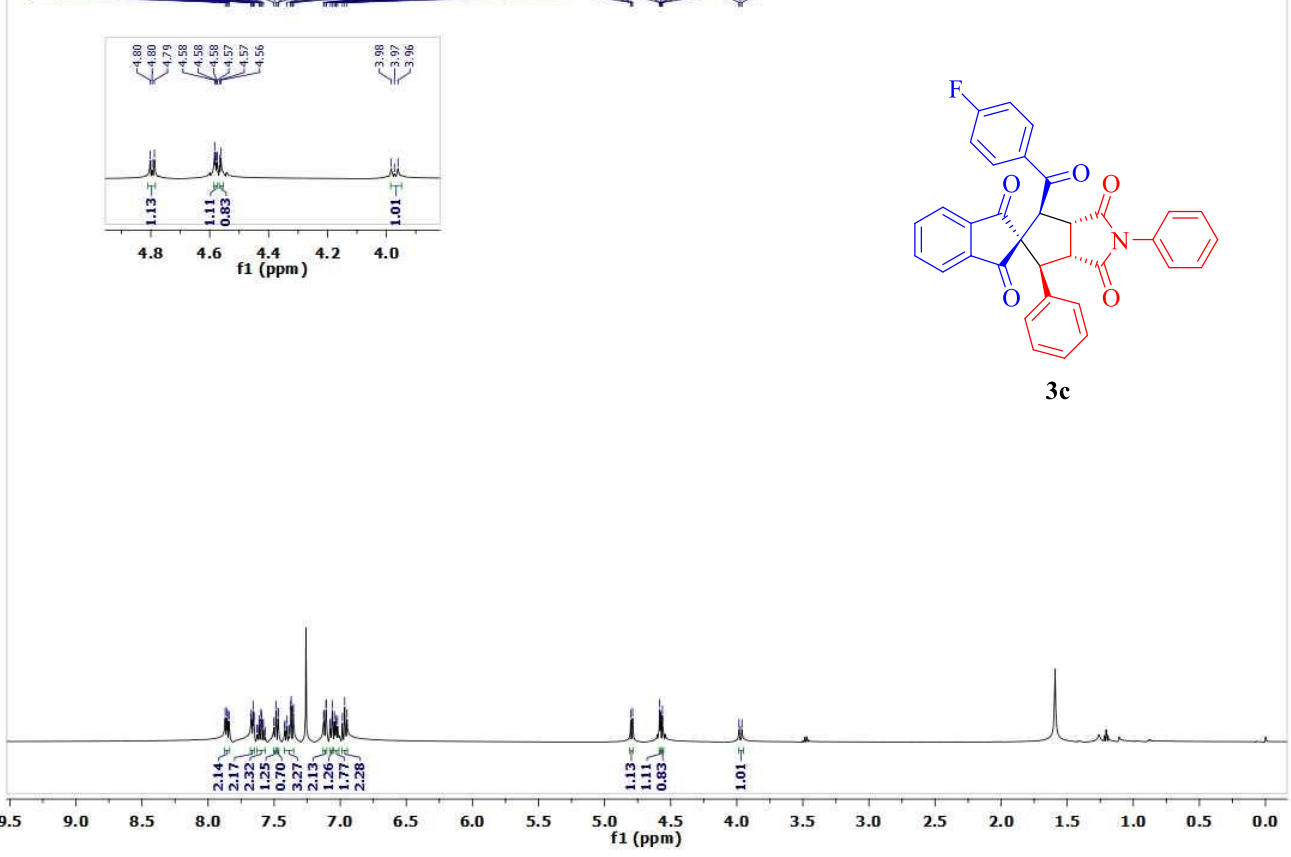

PD60A  
single pulse decoupled gated 13C NMR

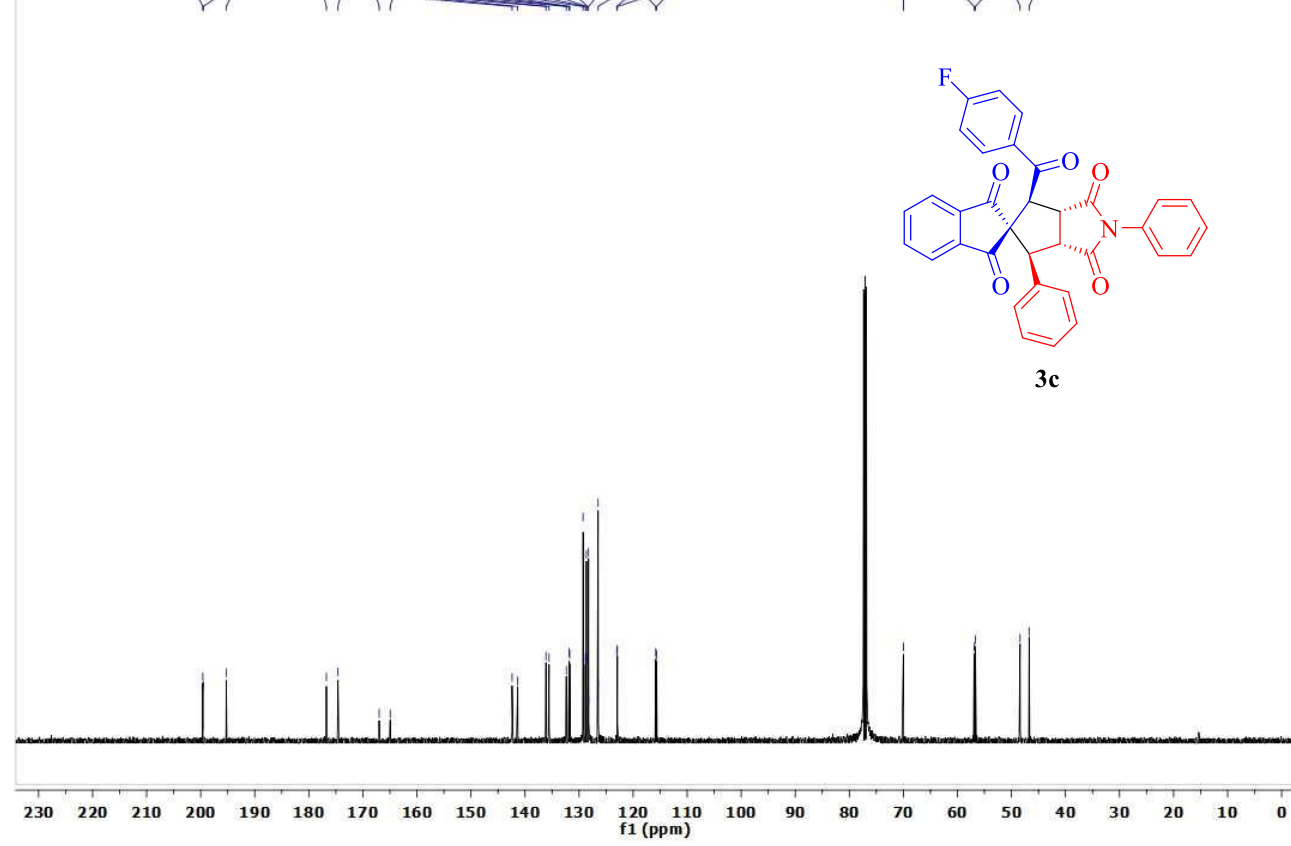

PD60  
-19F

103.58

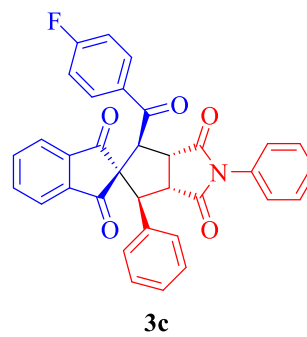

-30 -40 -50 -60 -70 -80 -90 -100 -110 -120 -130 -140 -150 -160 -170 -180 -190 -200 -210 -220 -230 -240  
f1 (ppm)

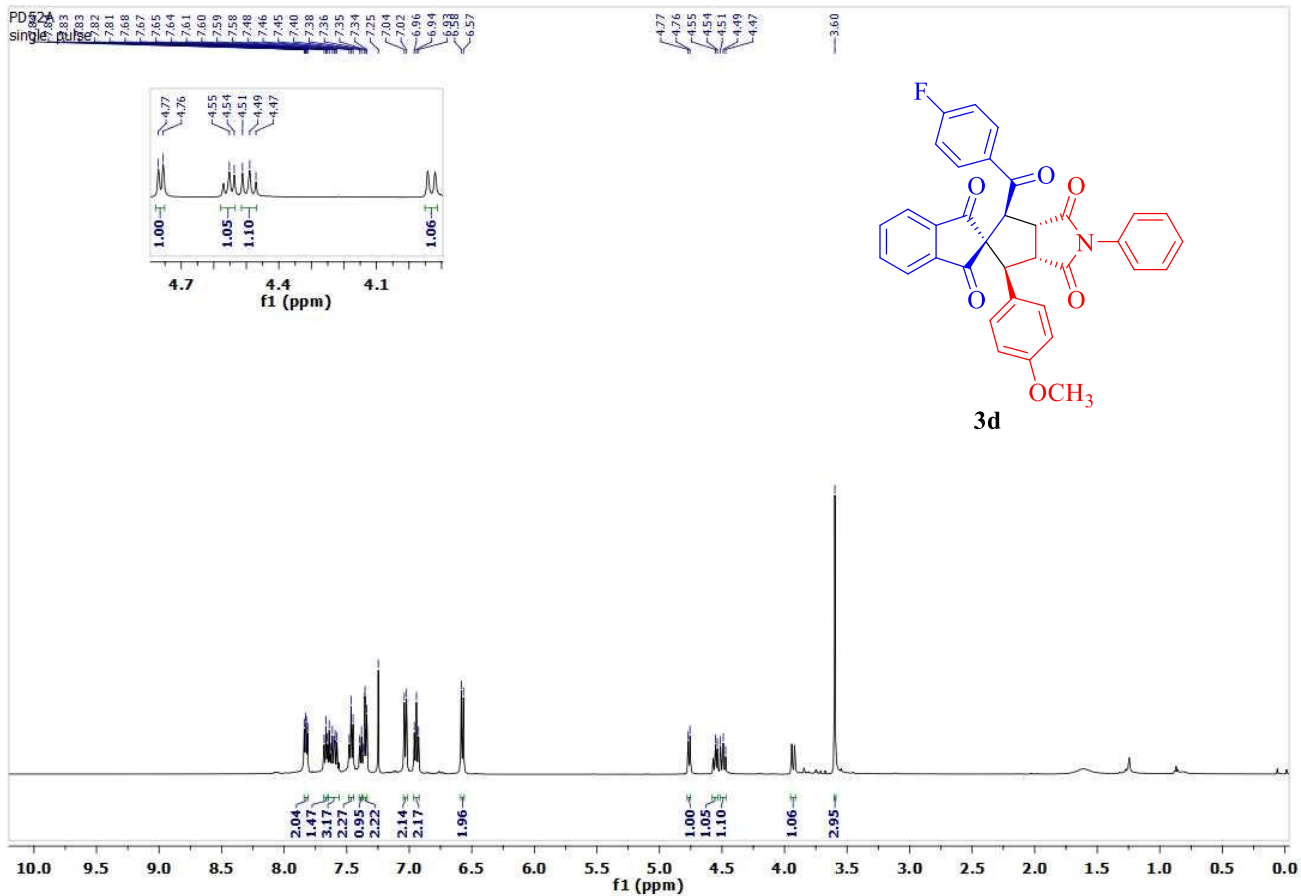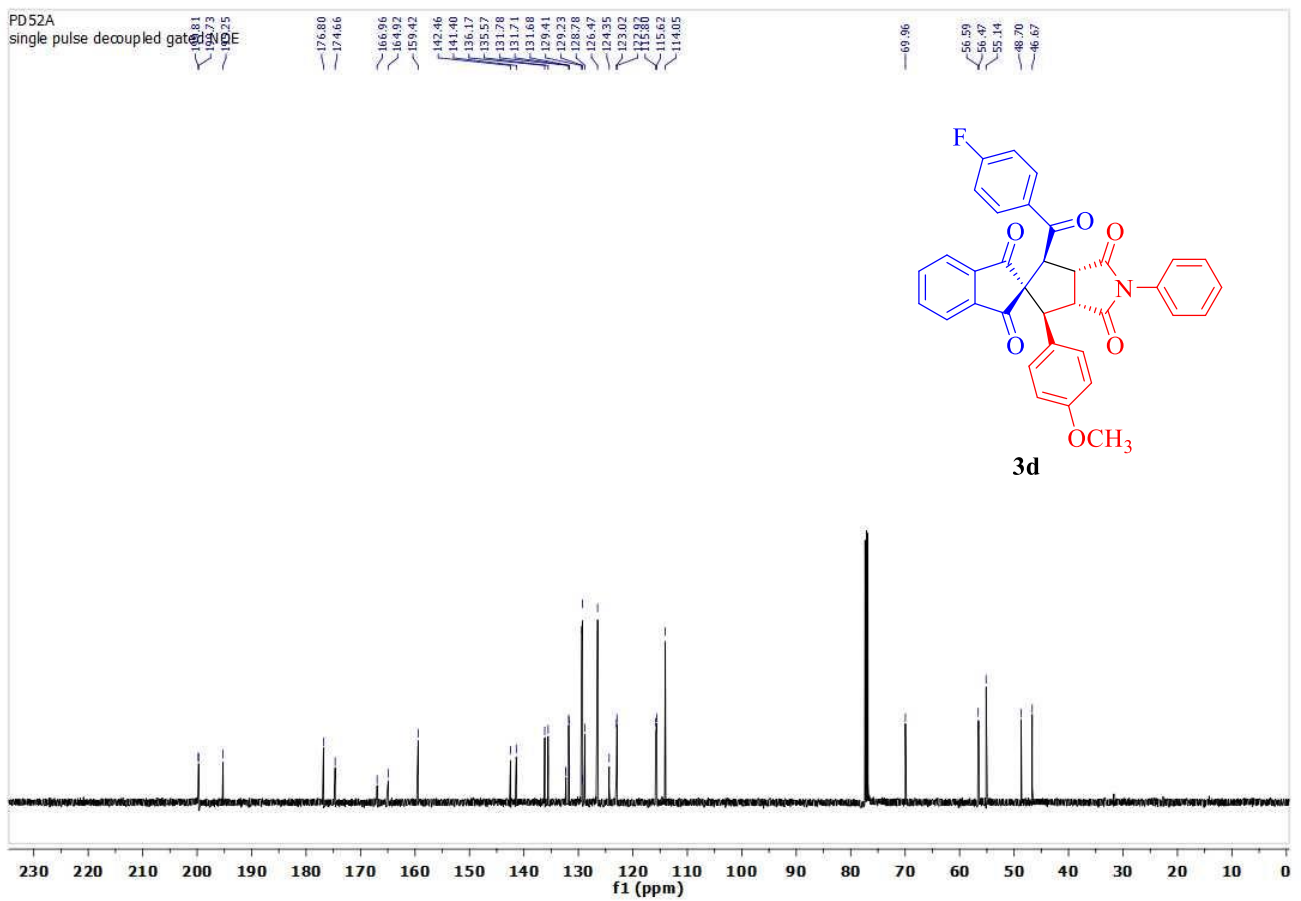

PD52  
-19F

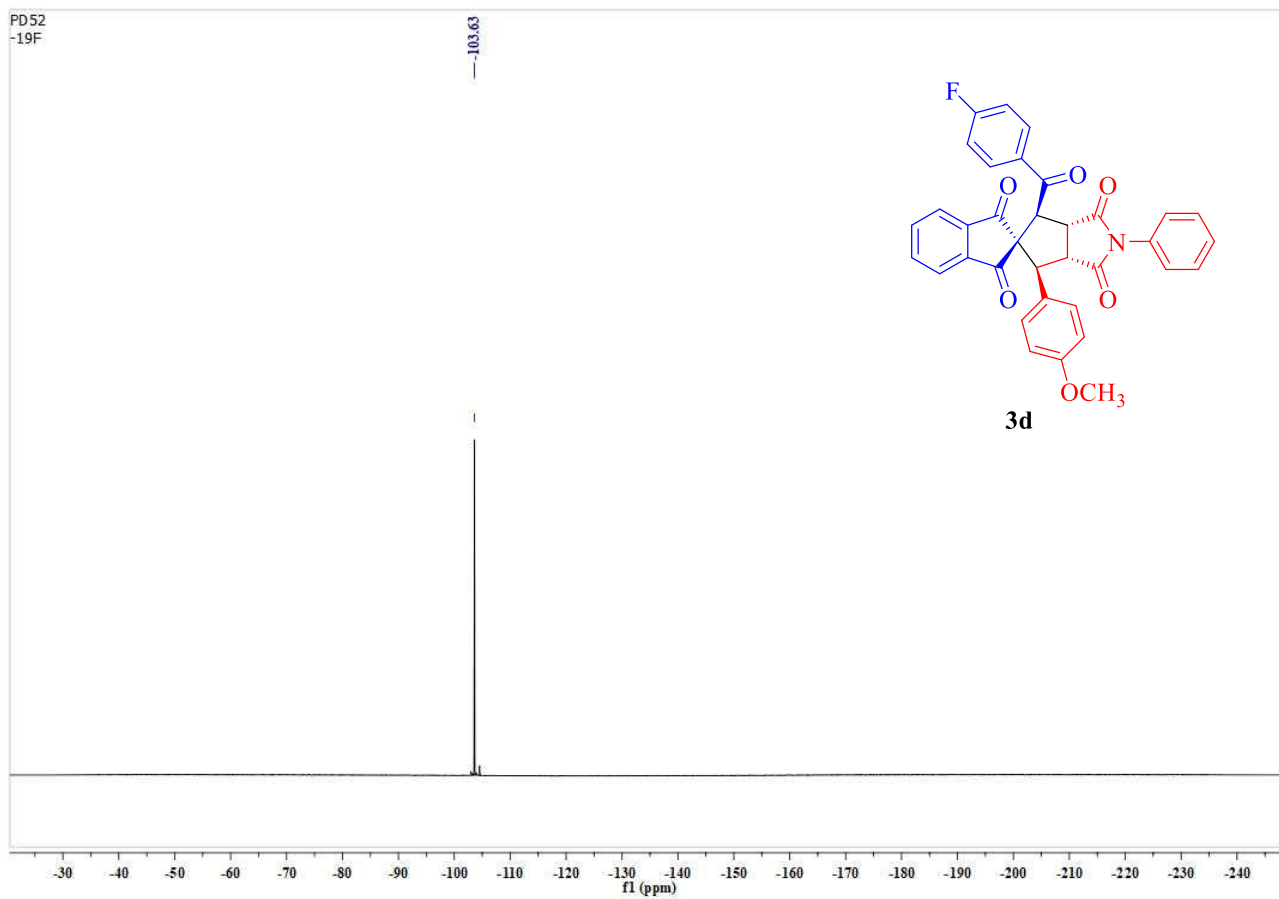



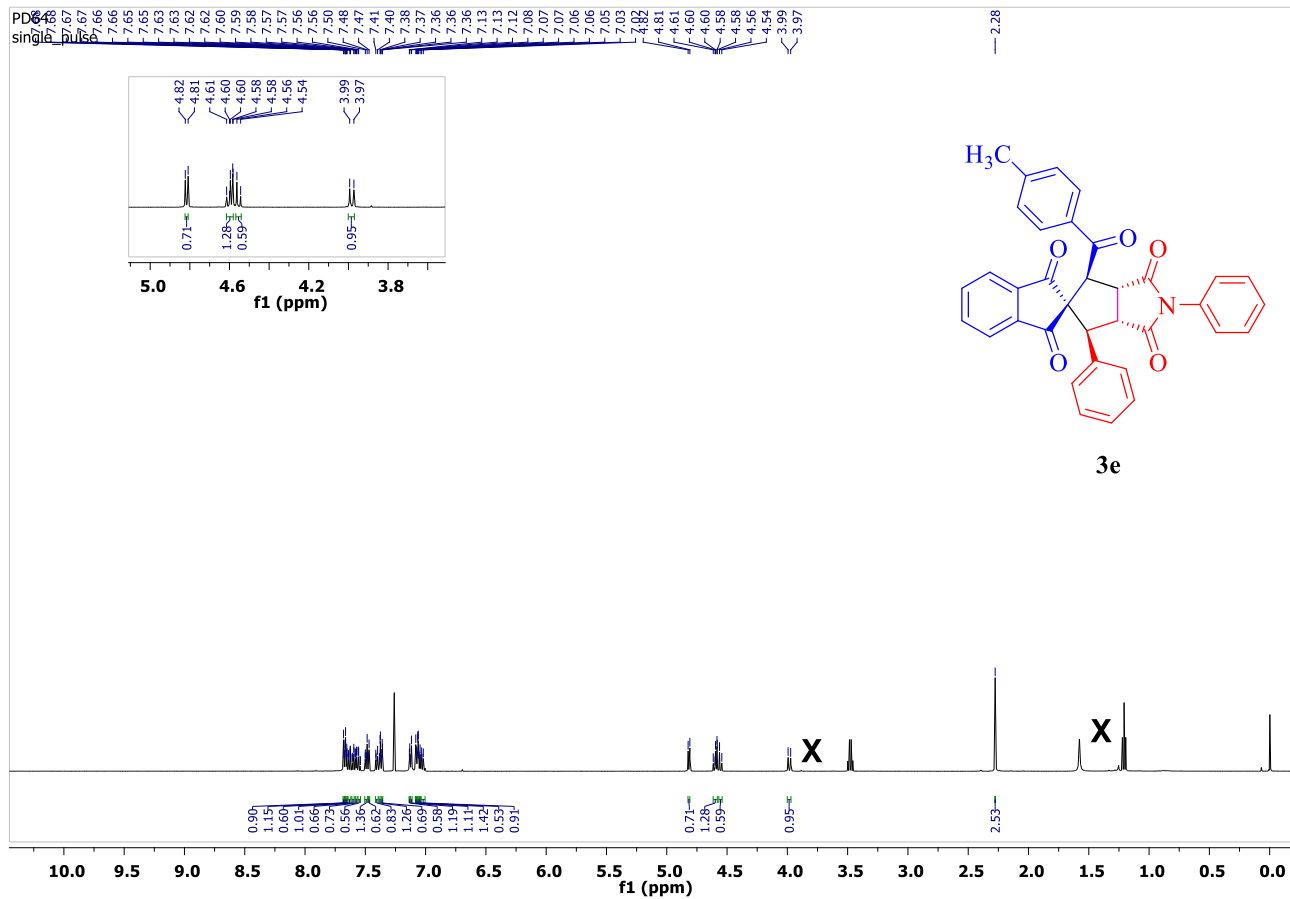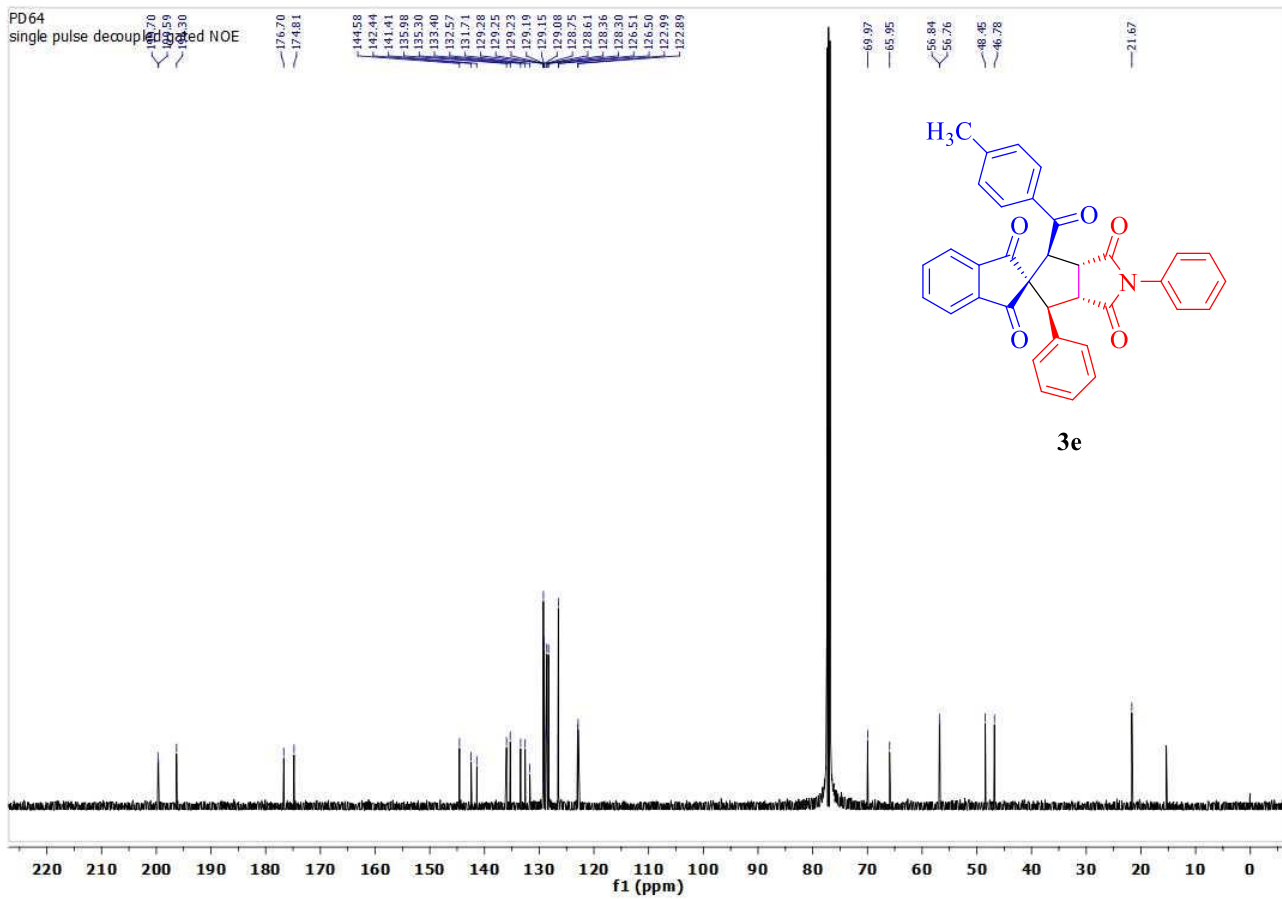

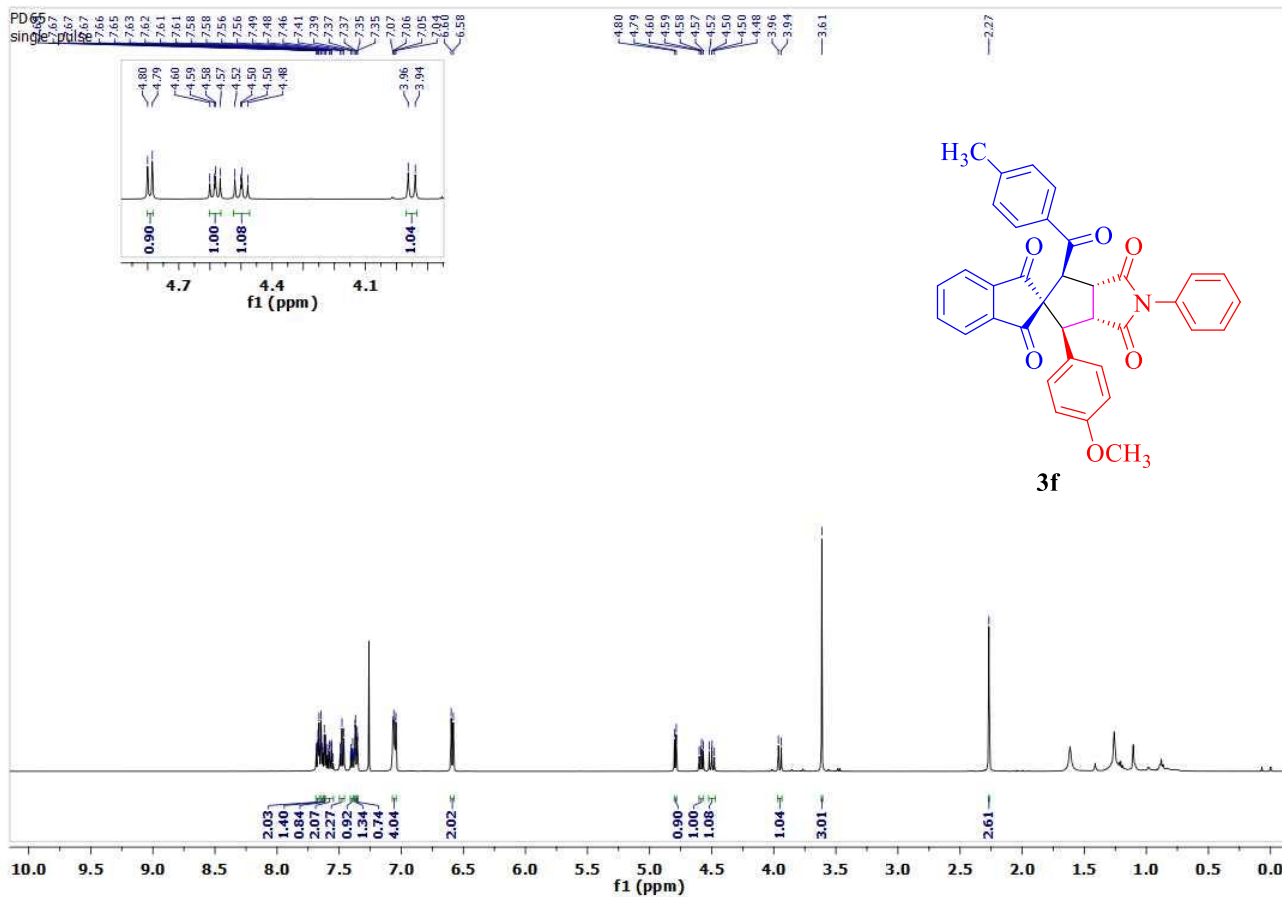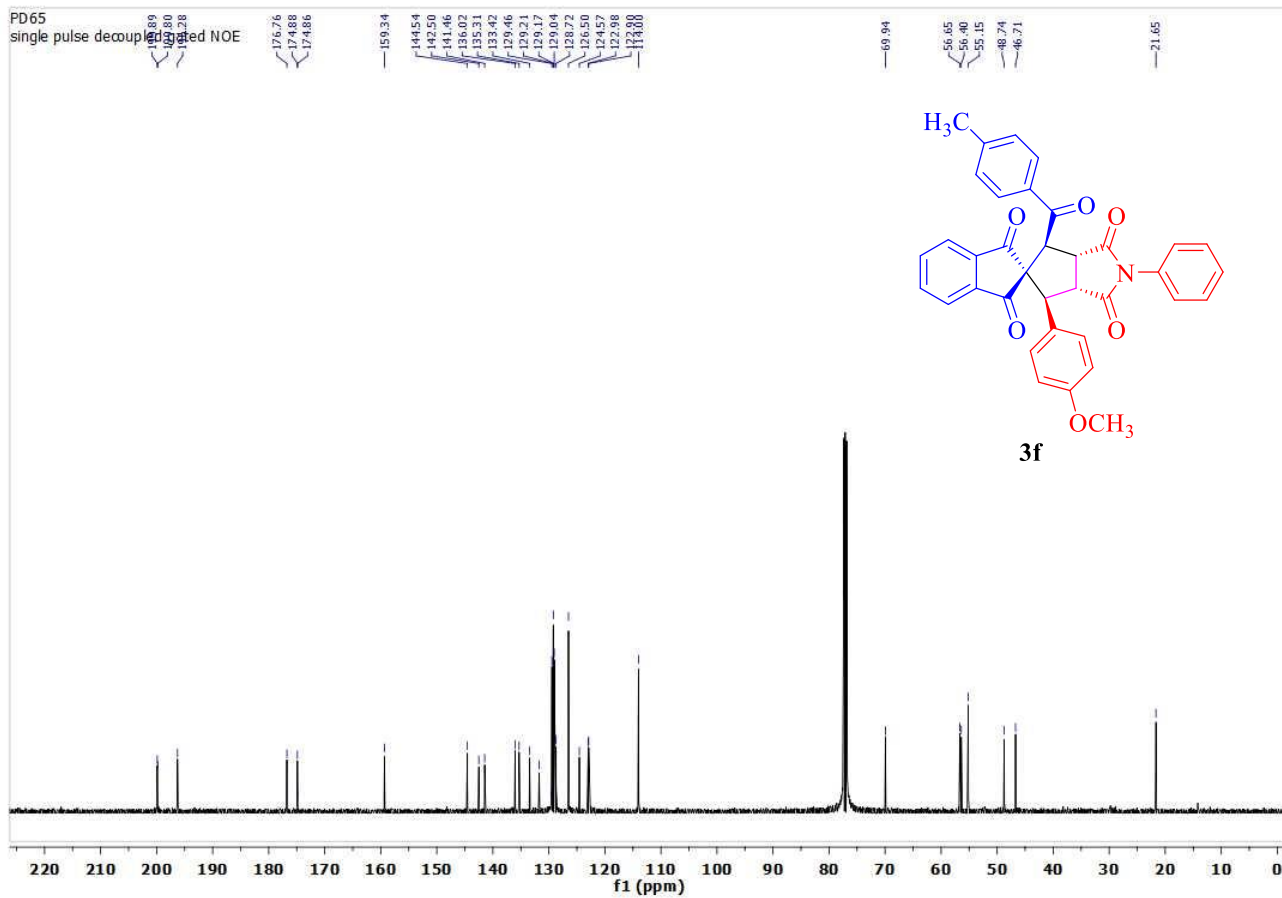

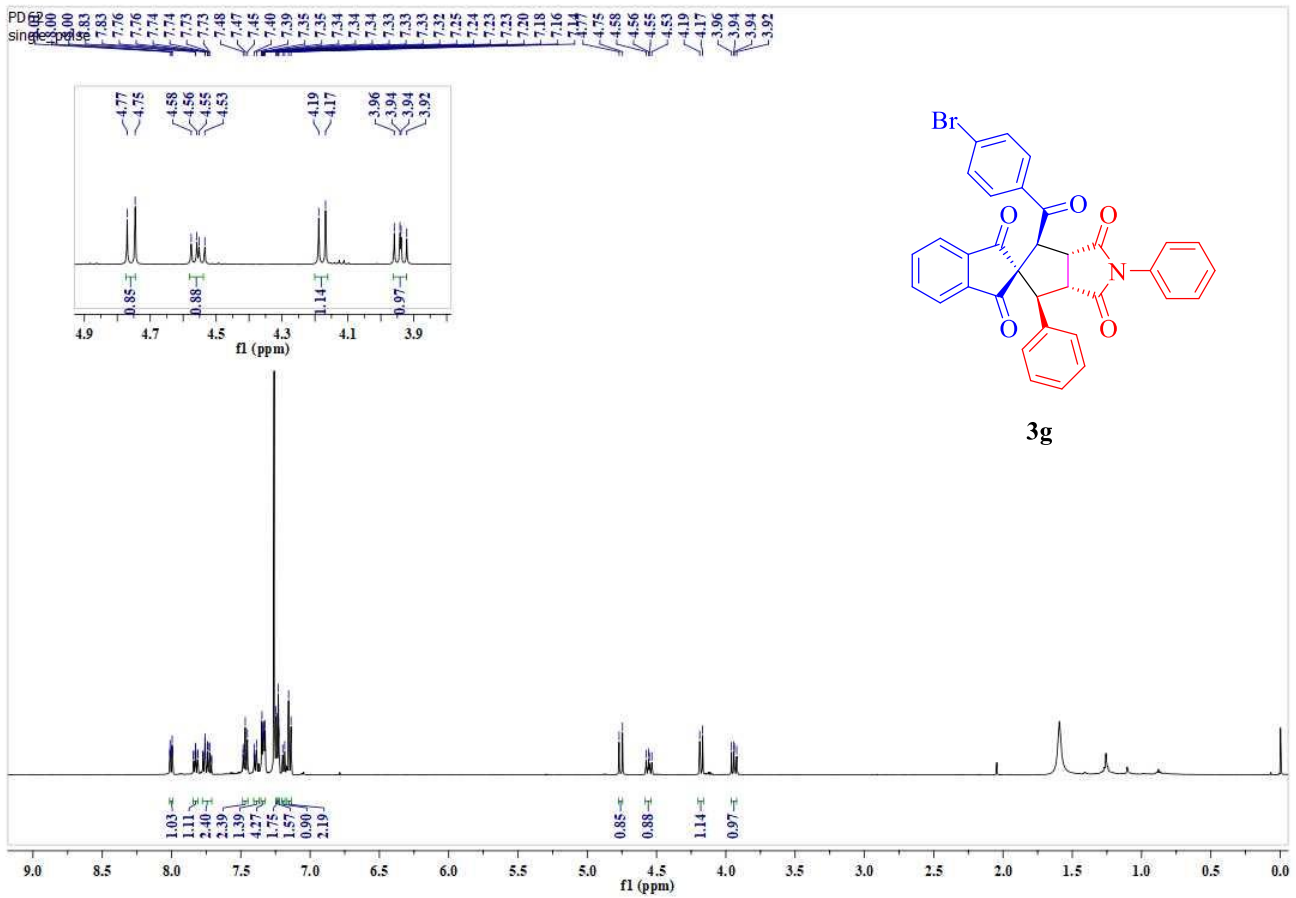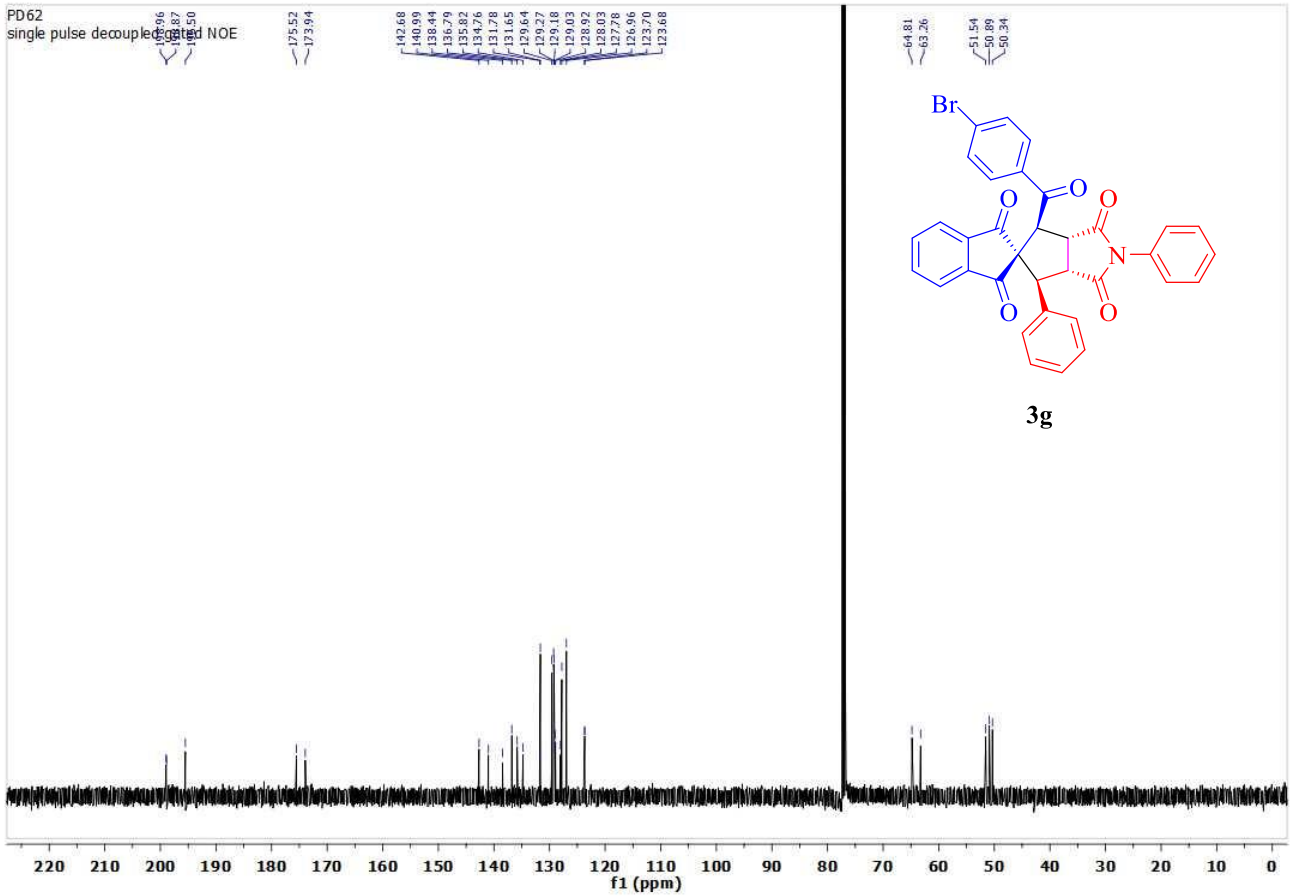

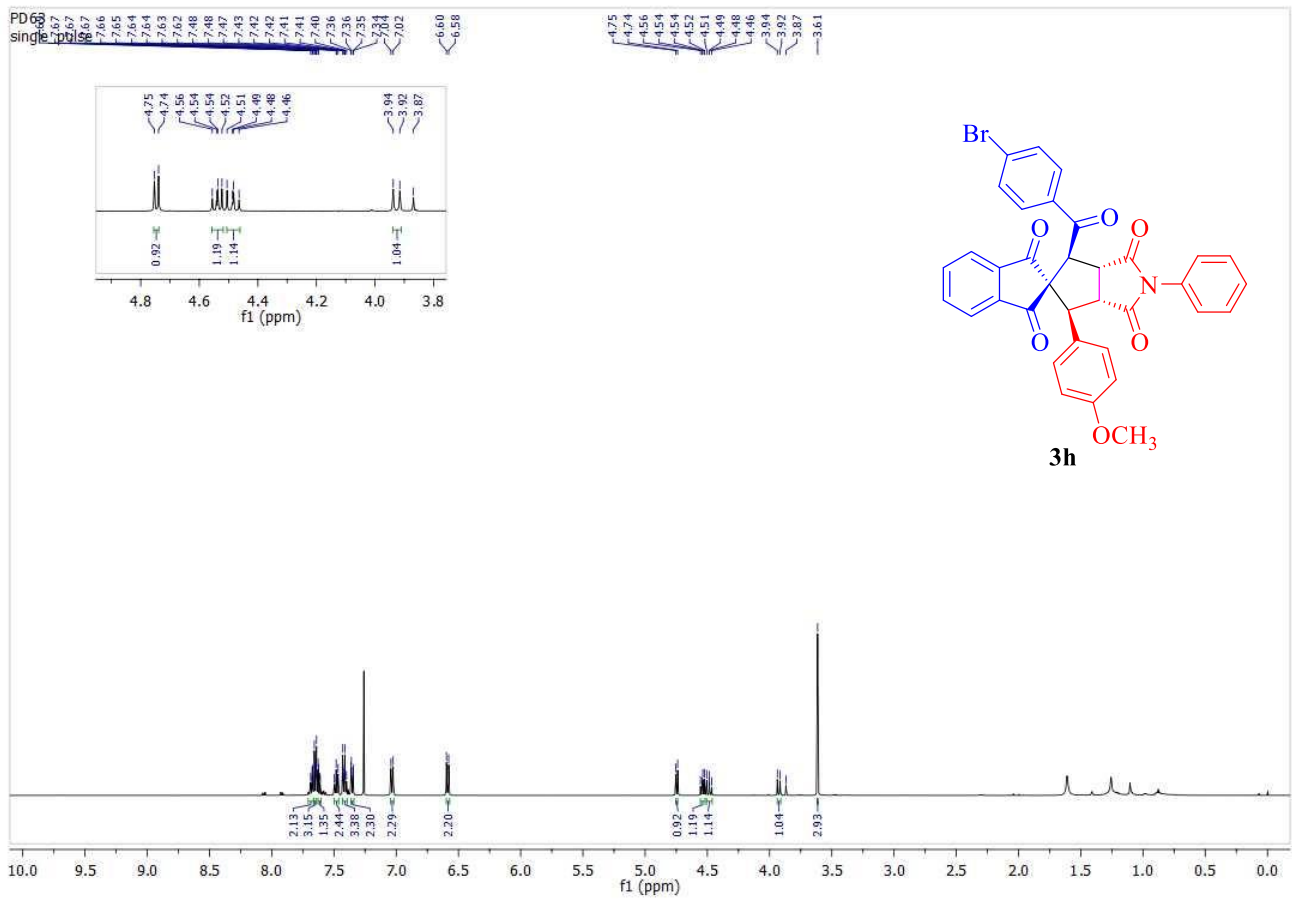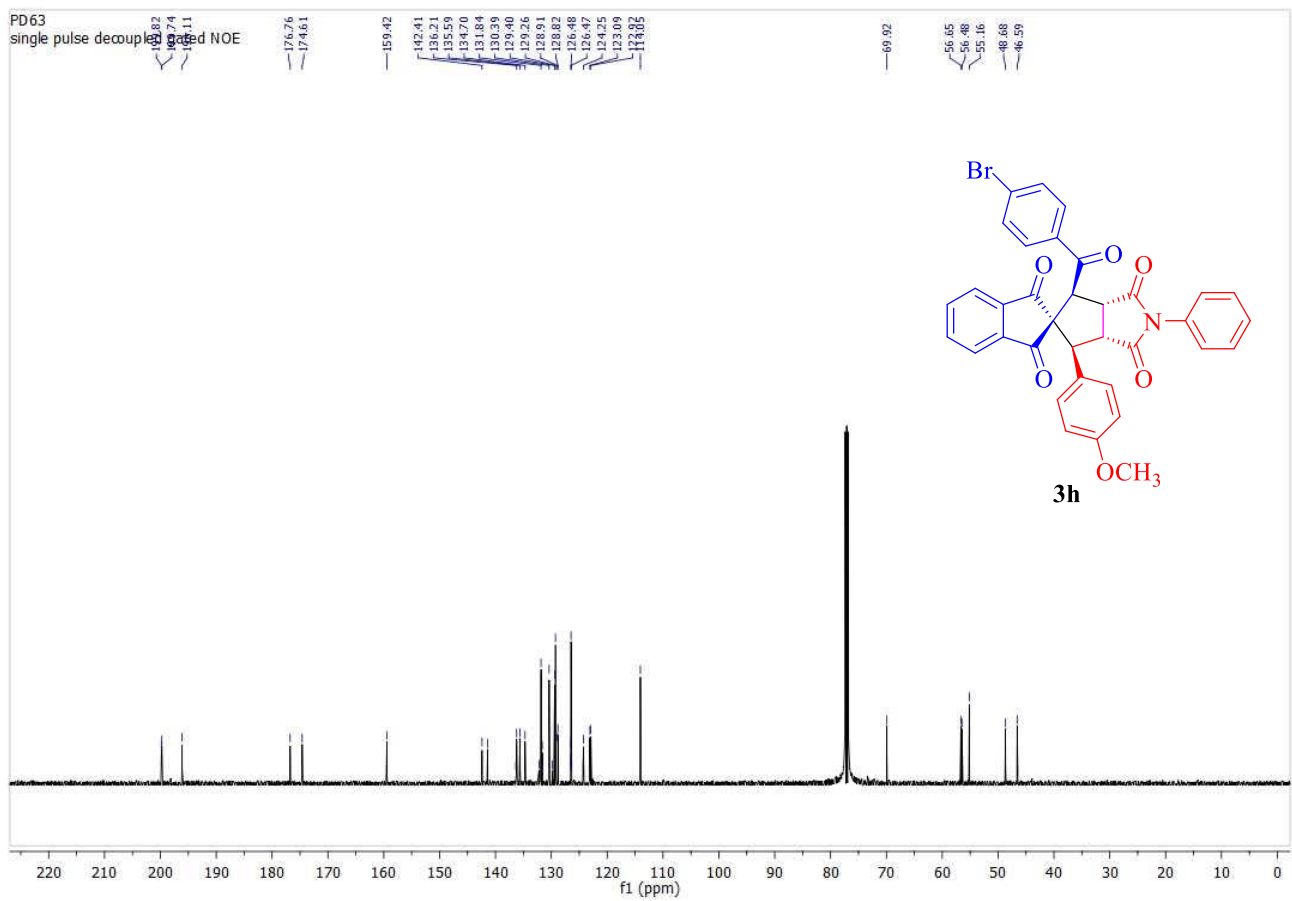

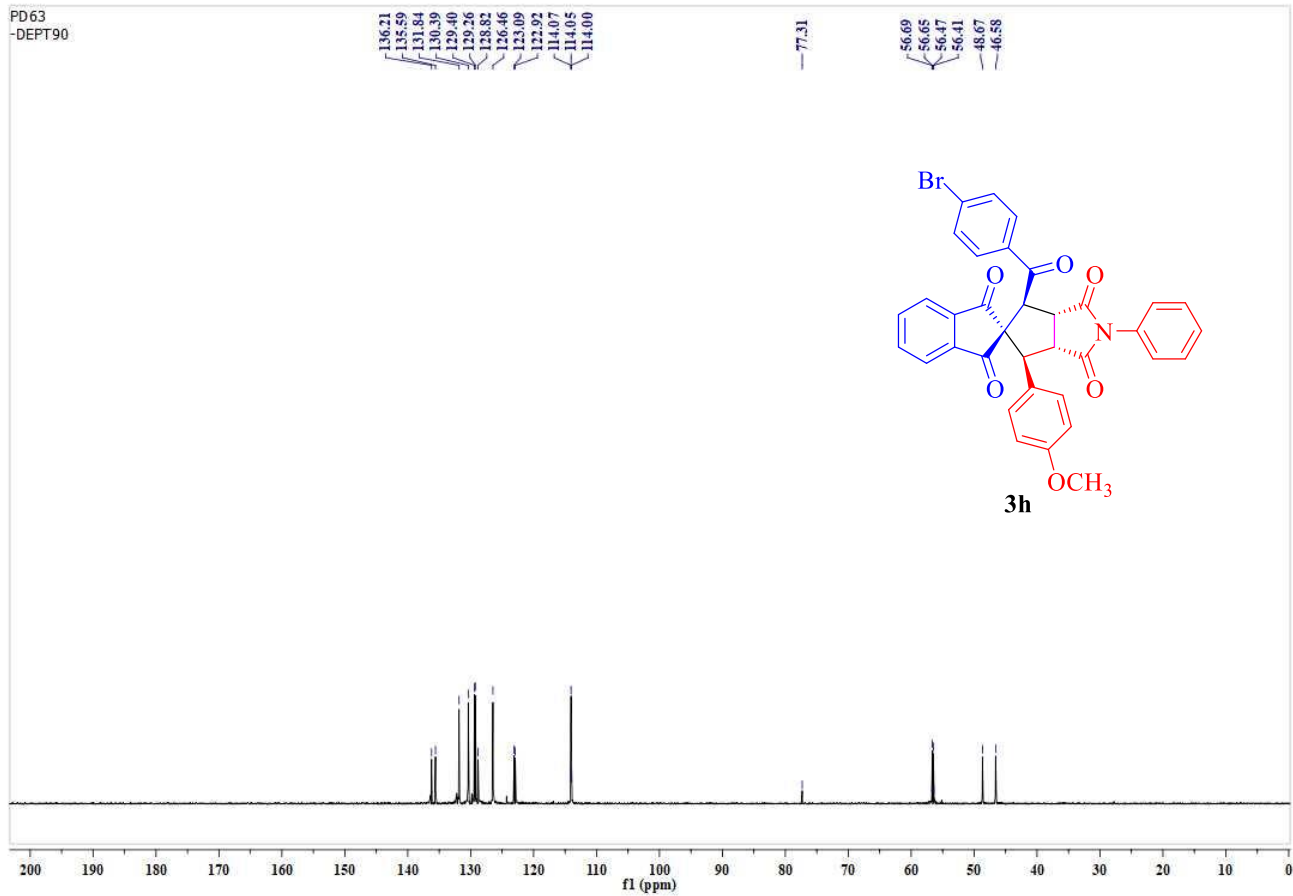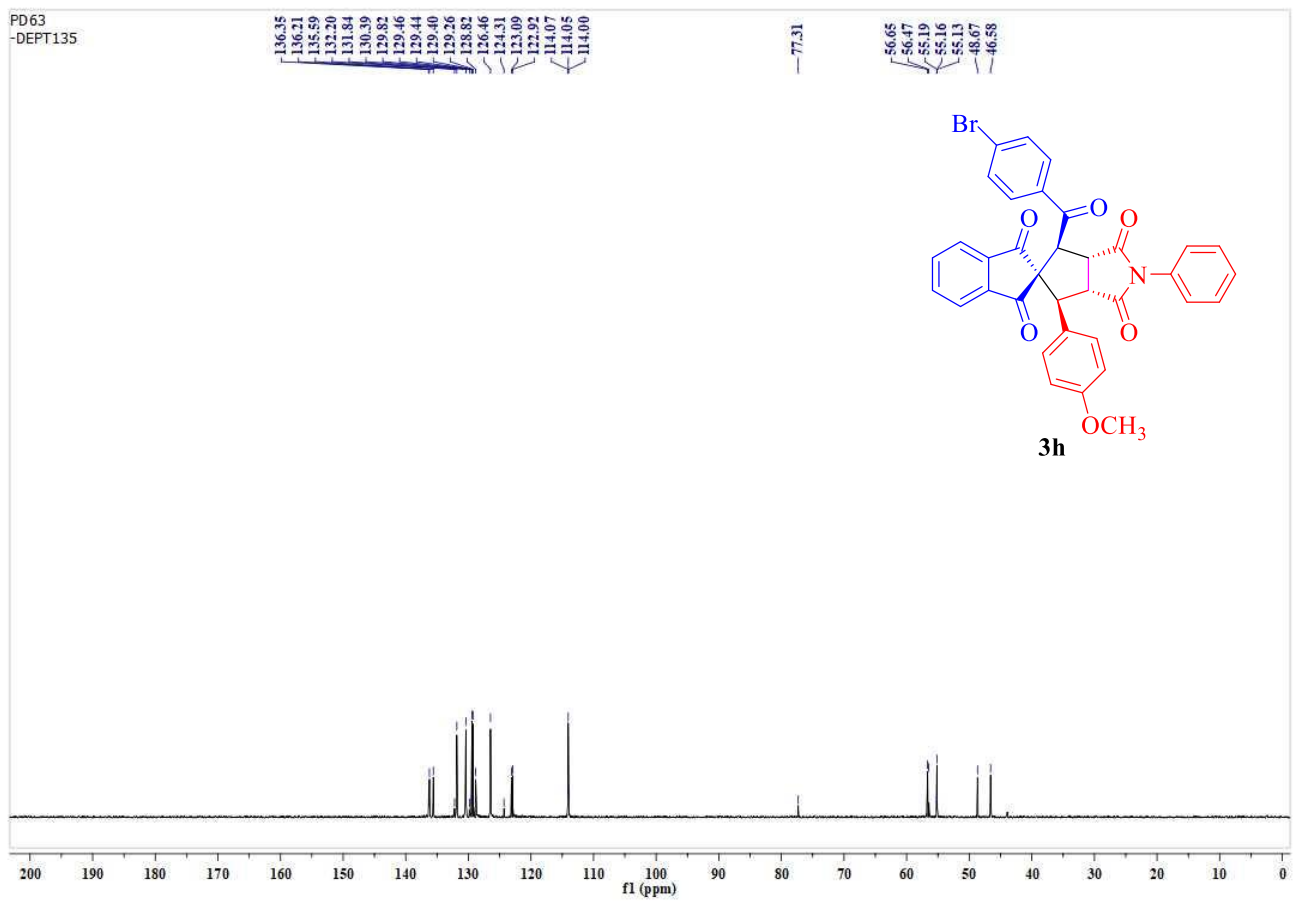

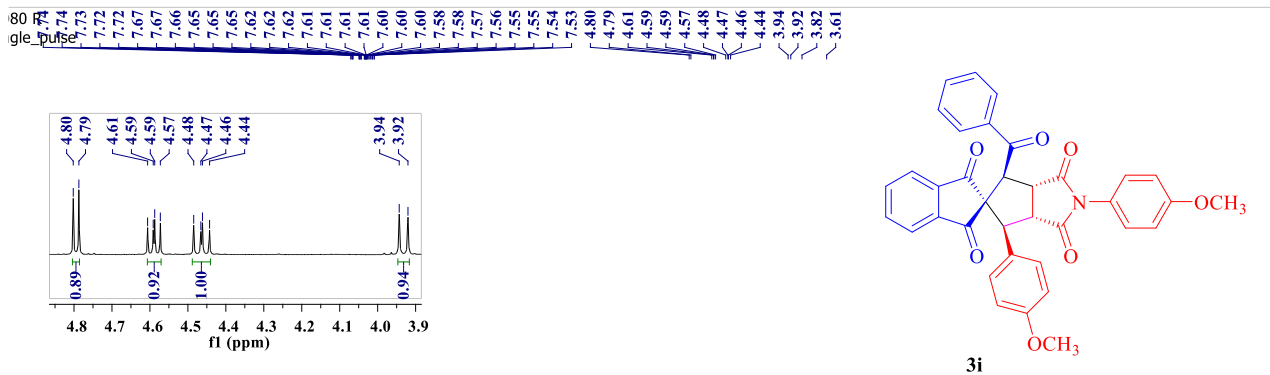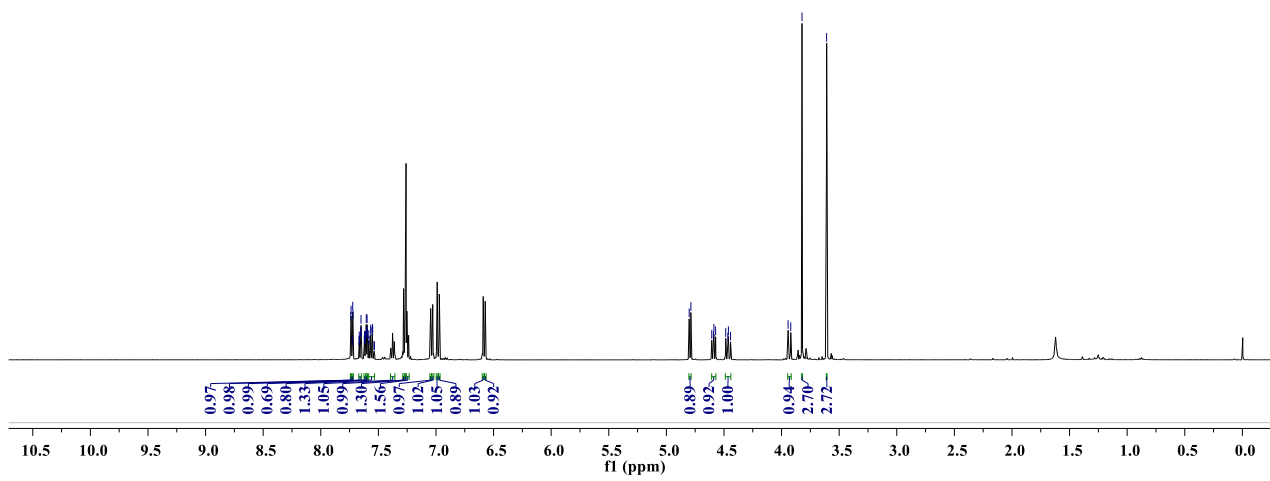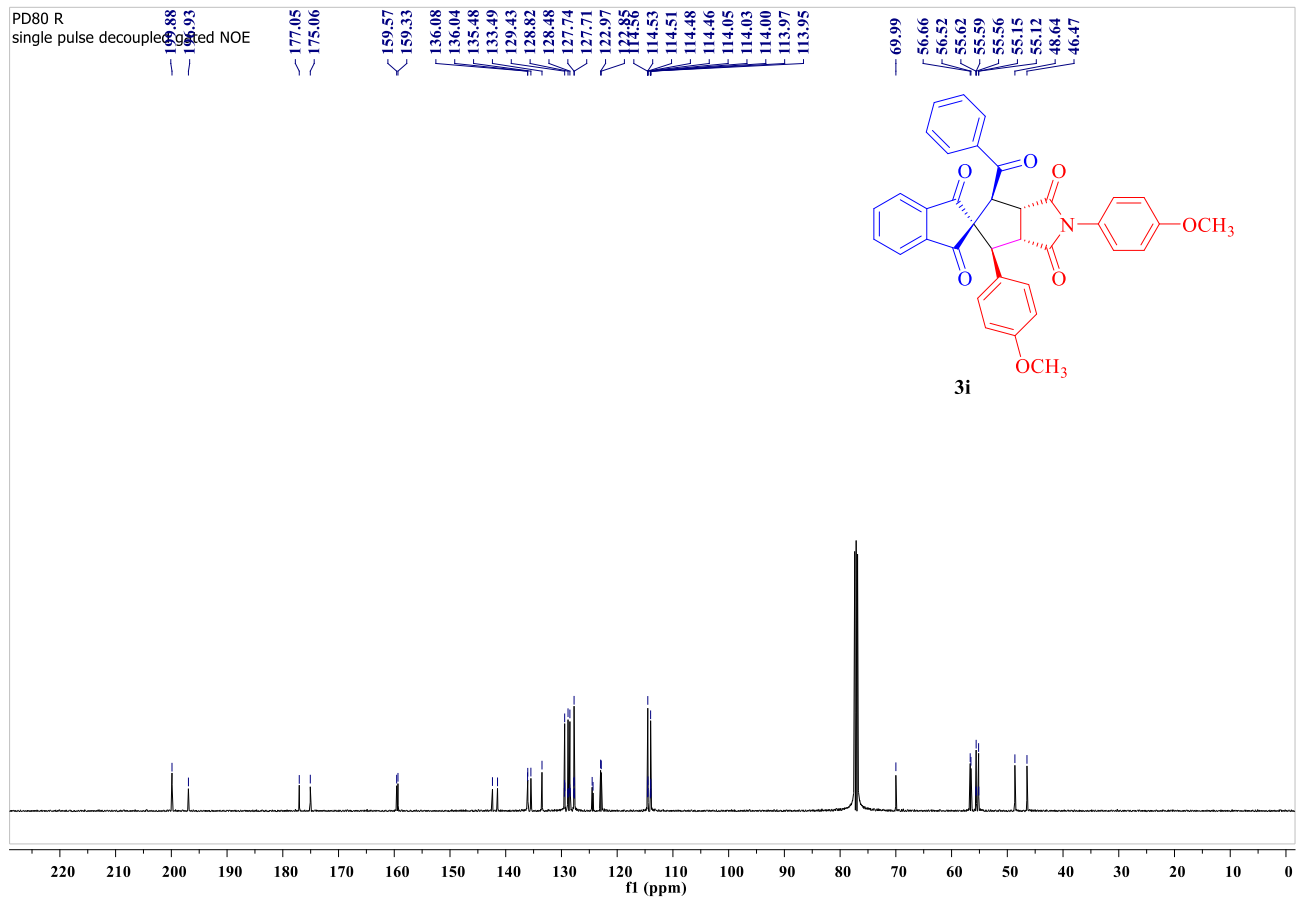

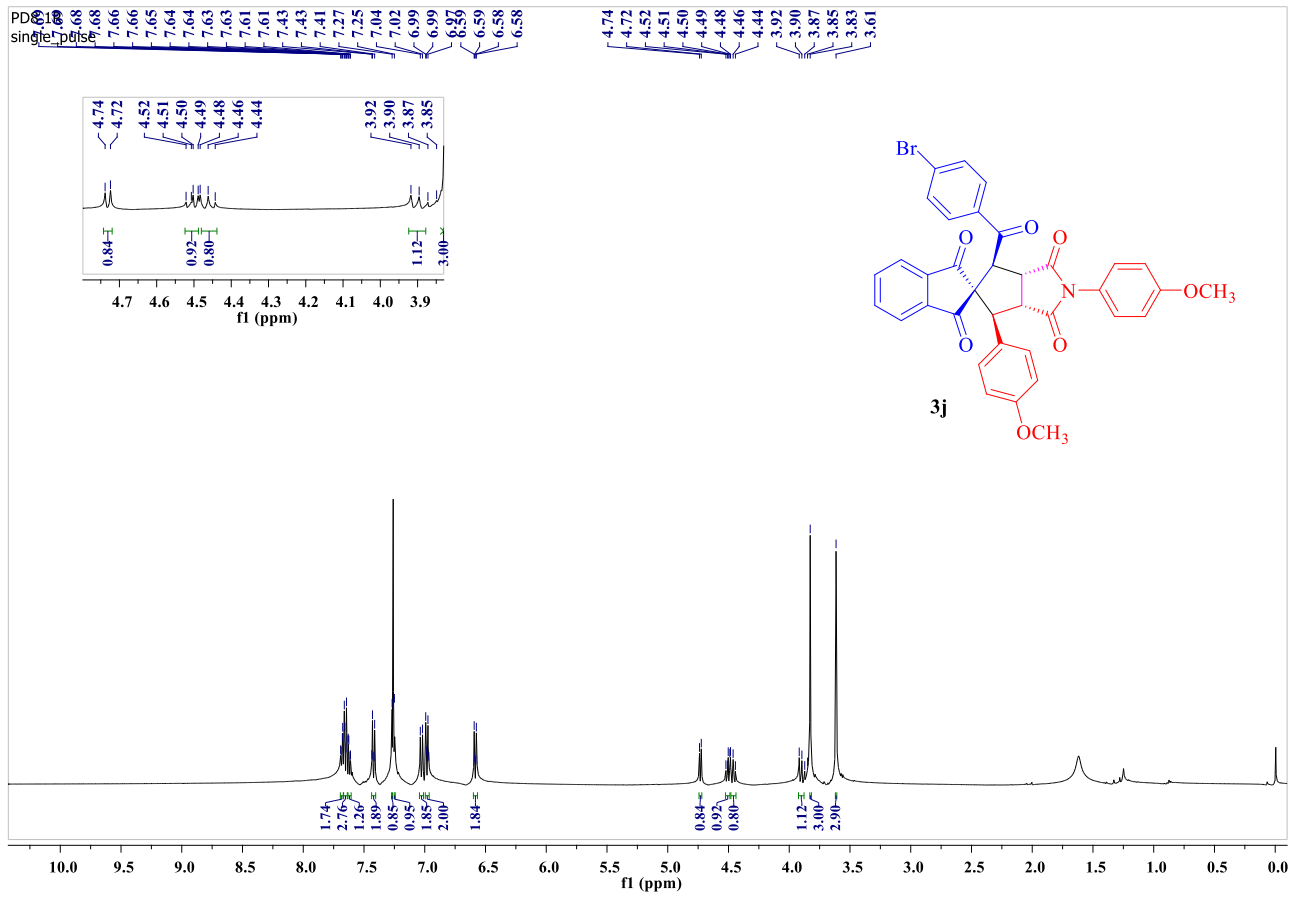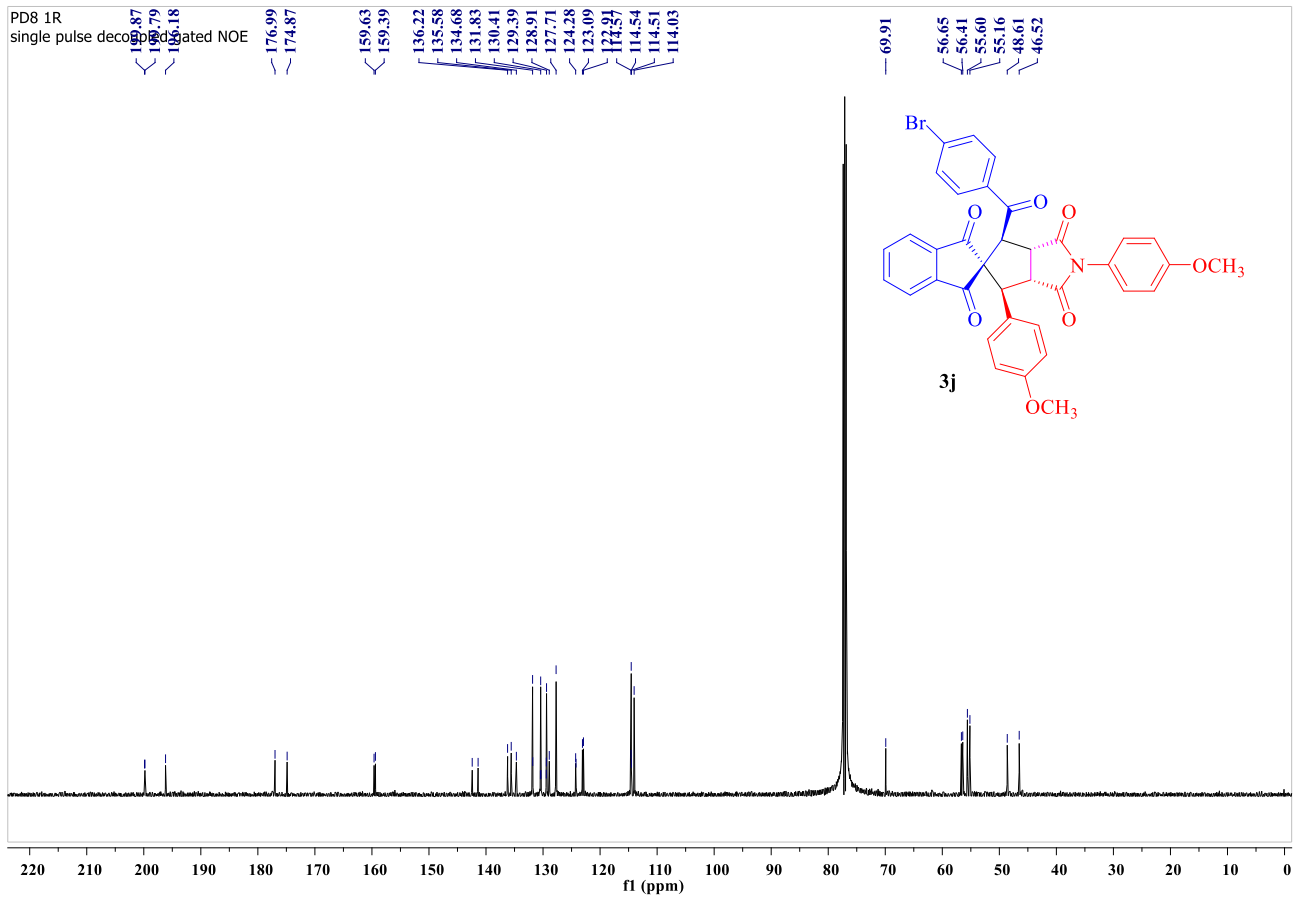

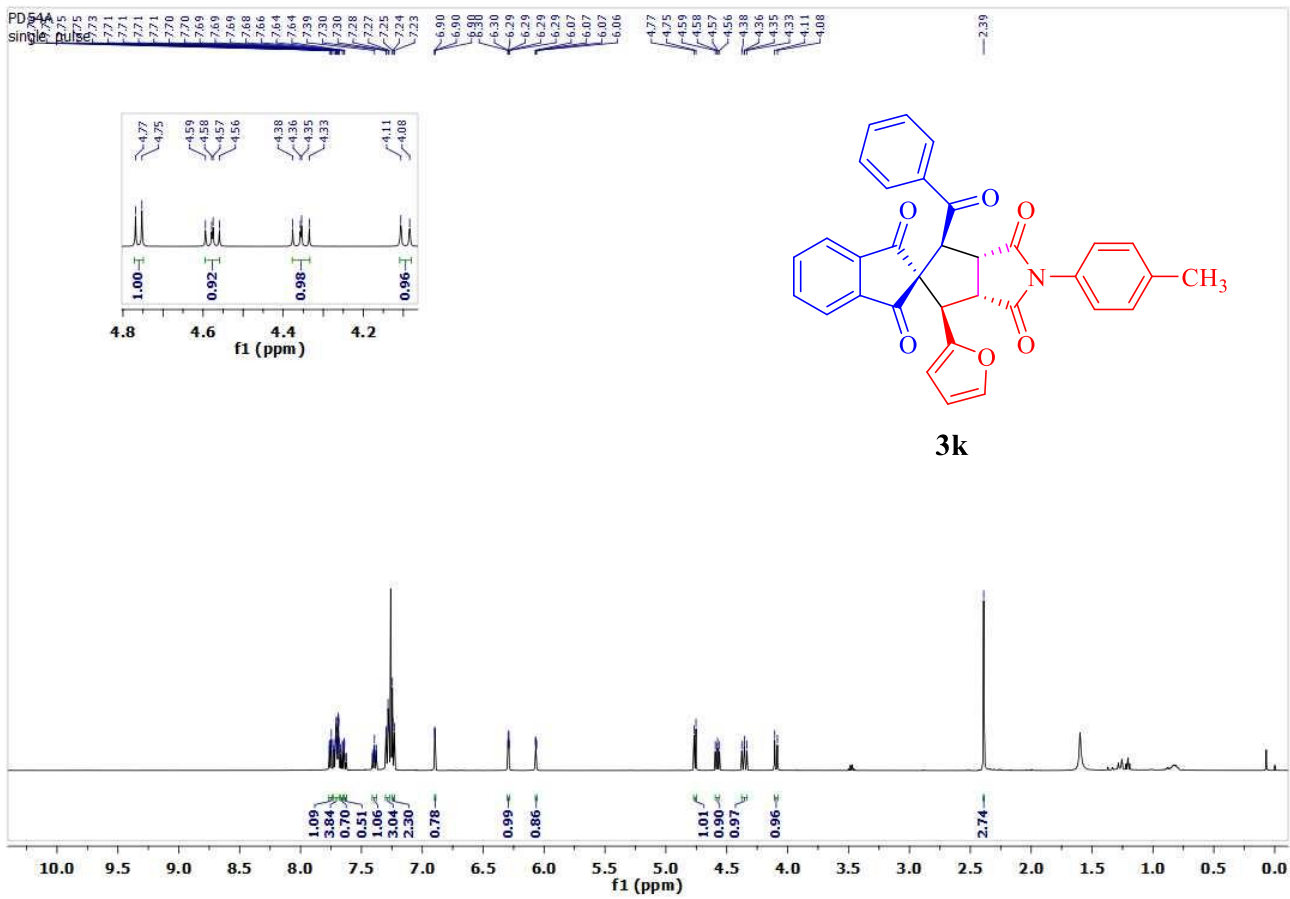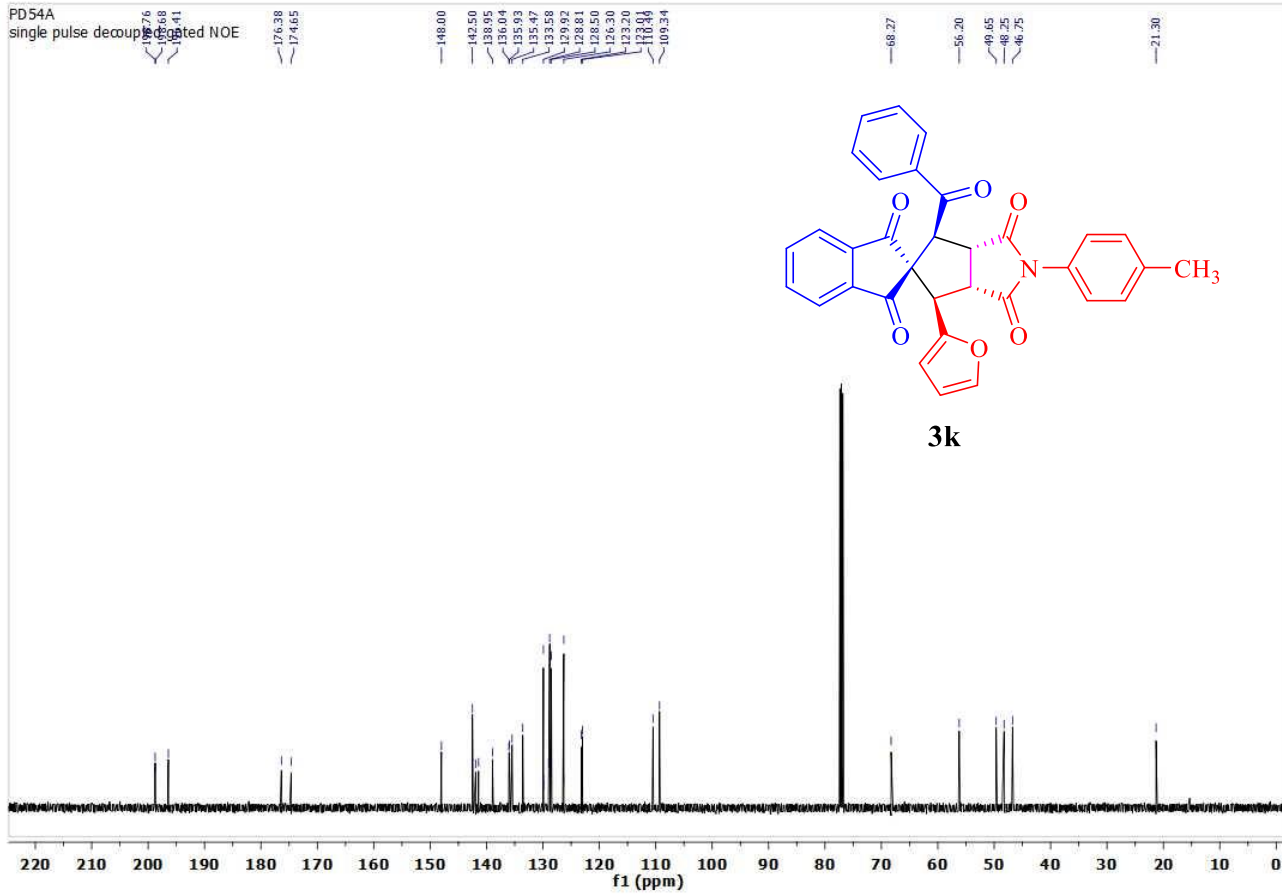





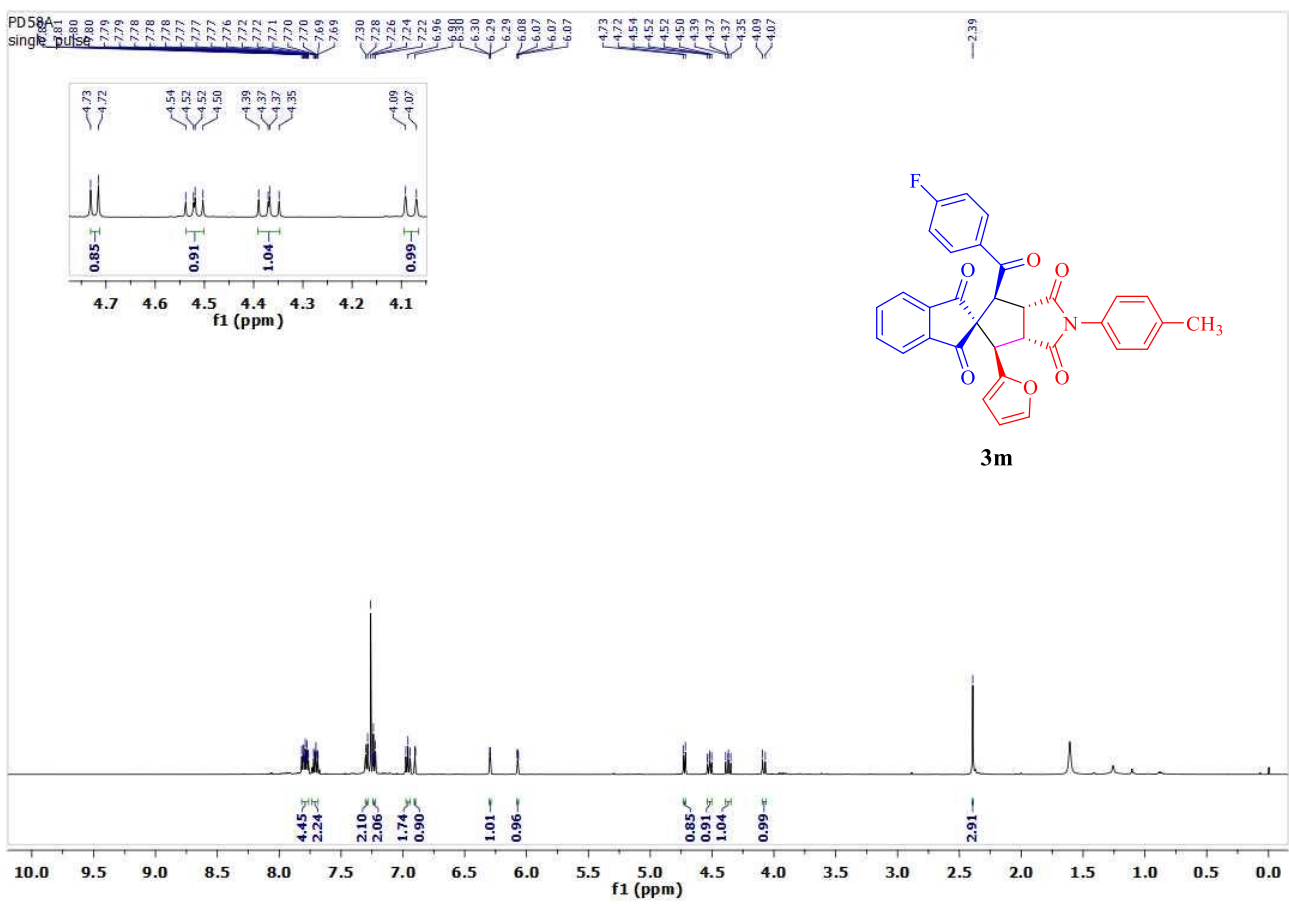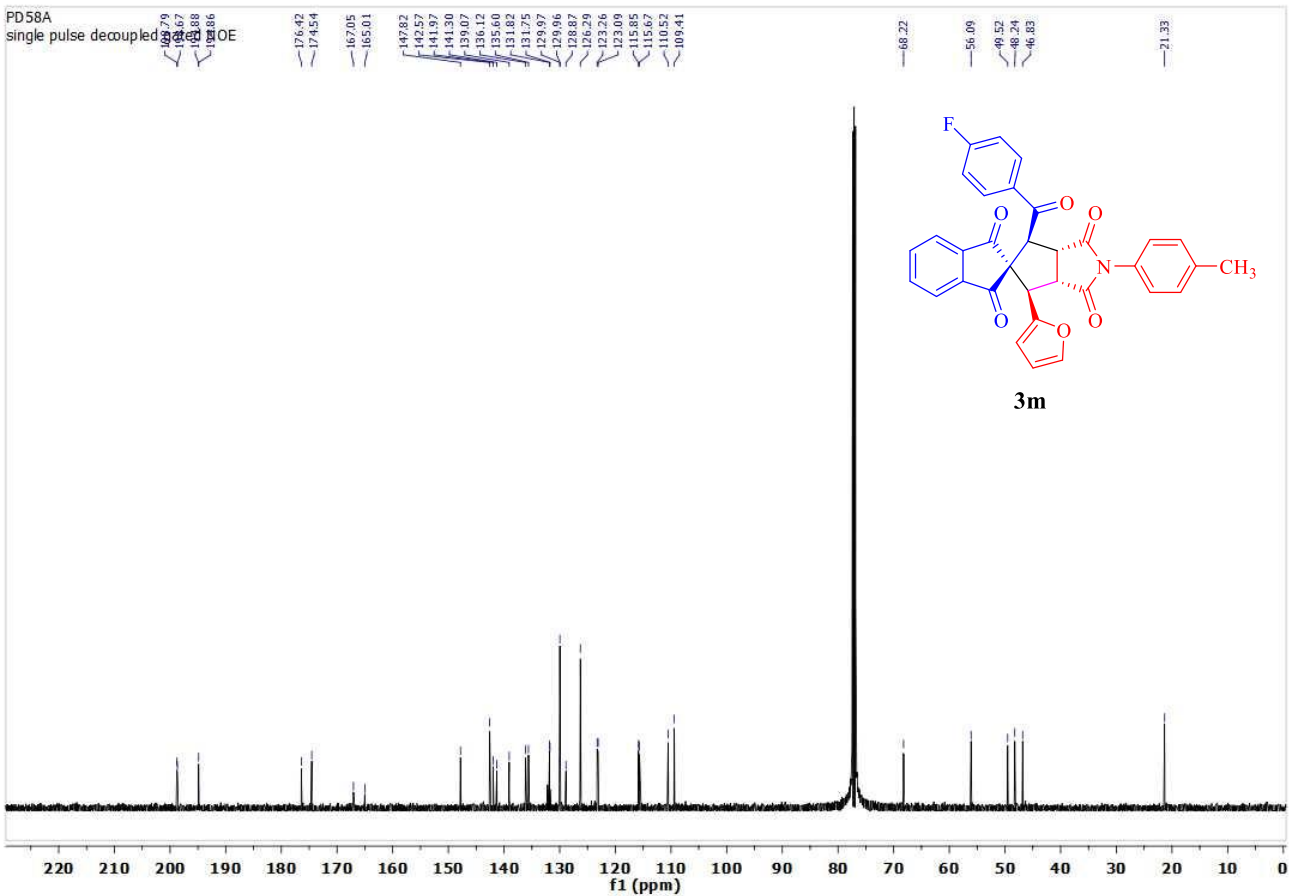

PD59  
-19F

—103.40

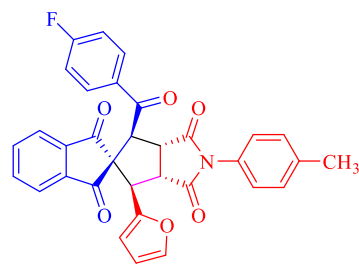

**3m**

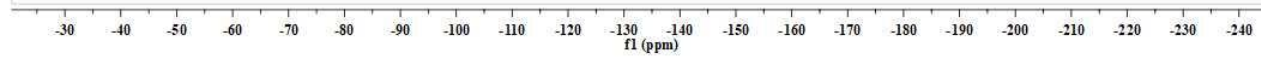

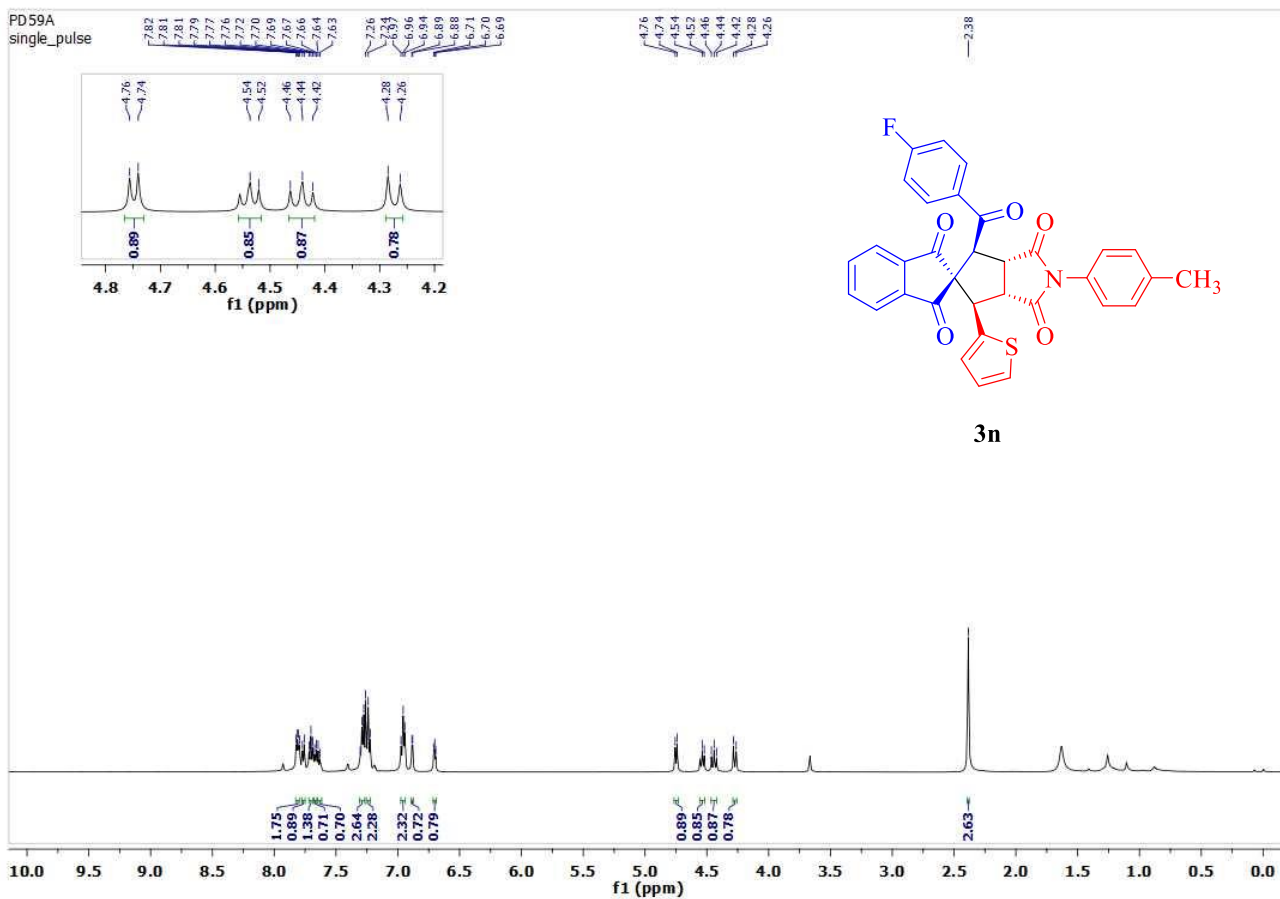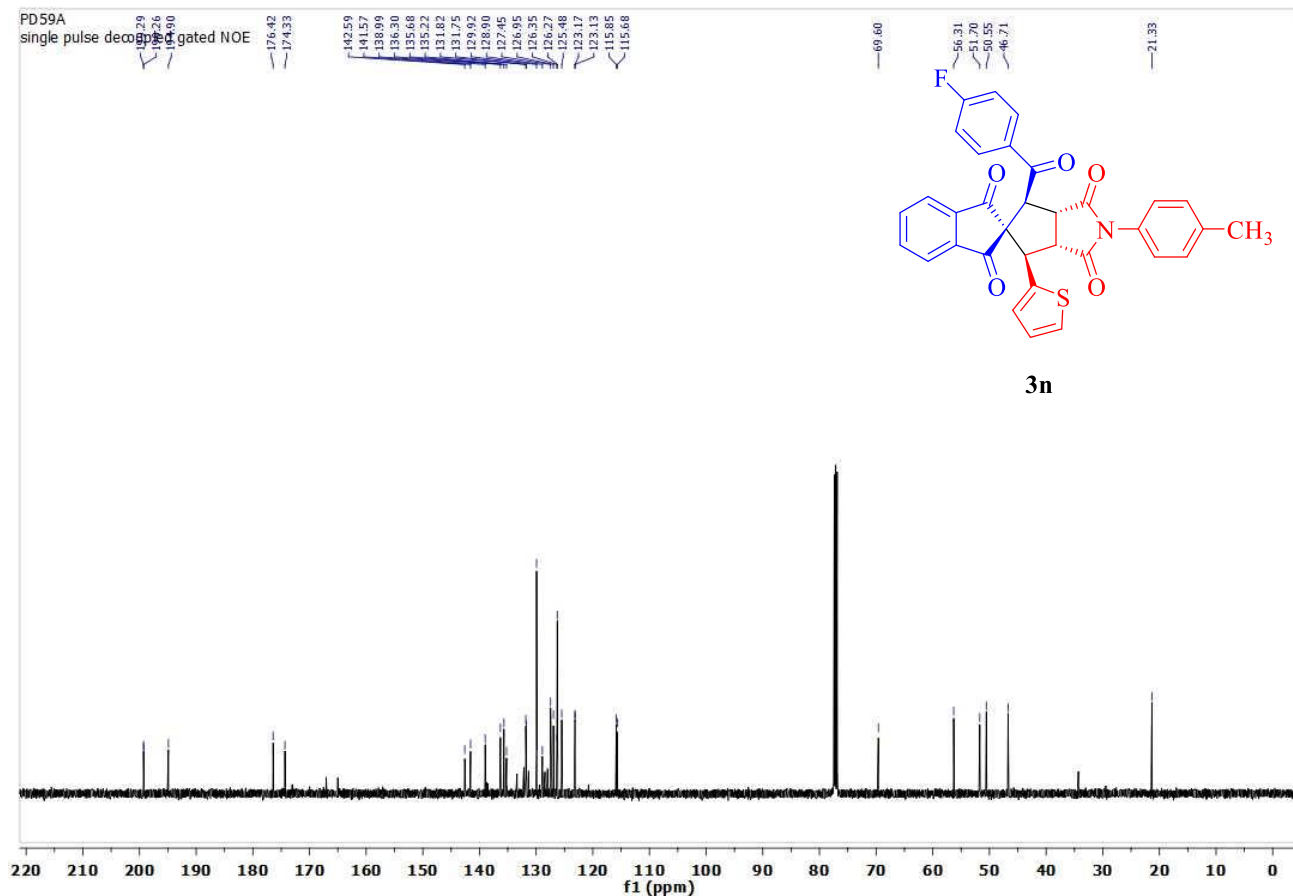

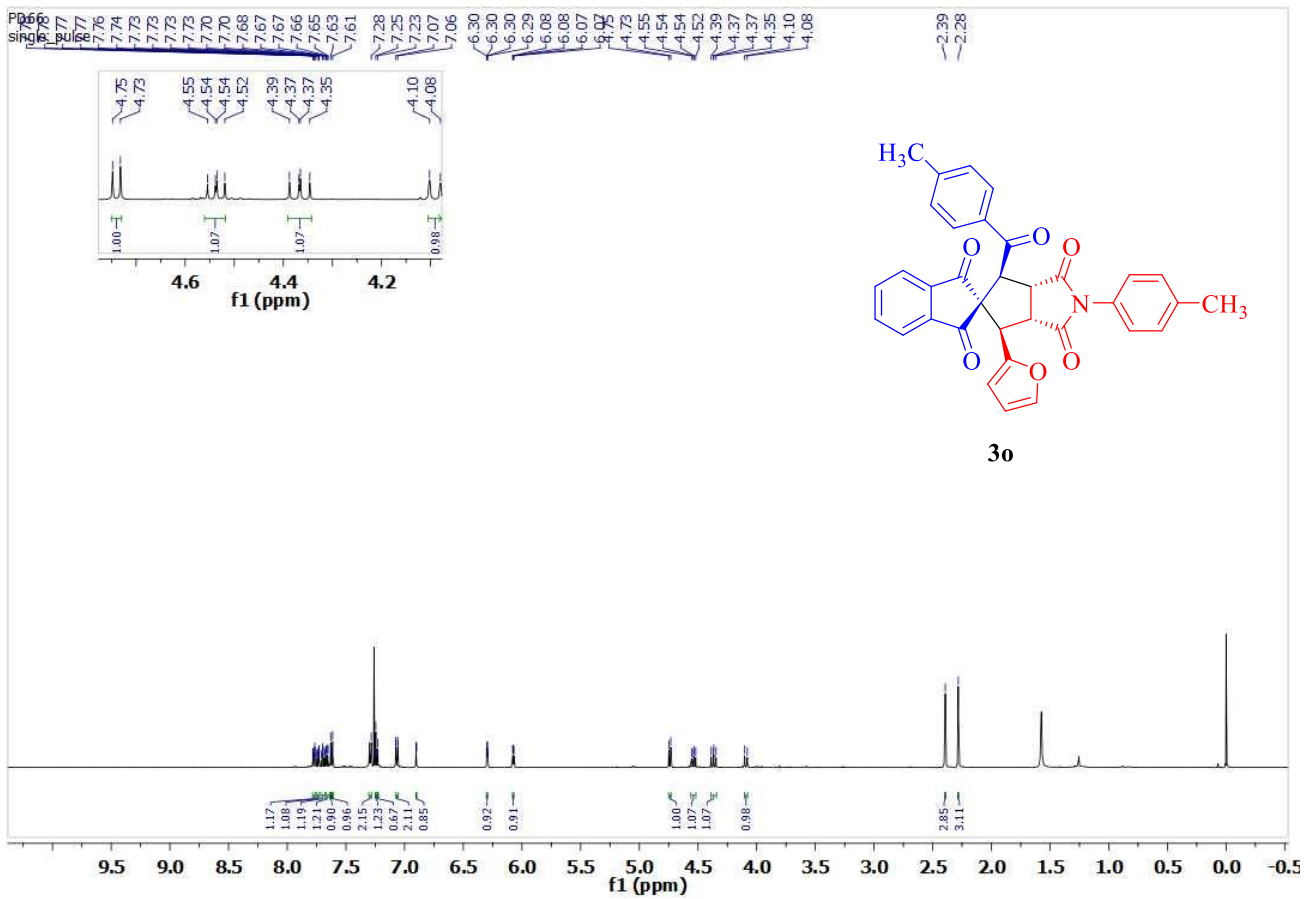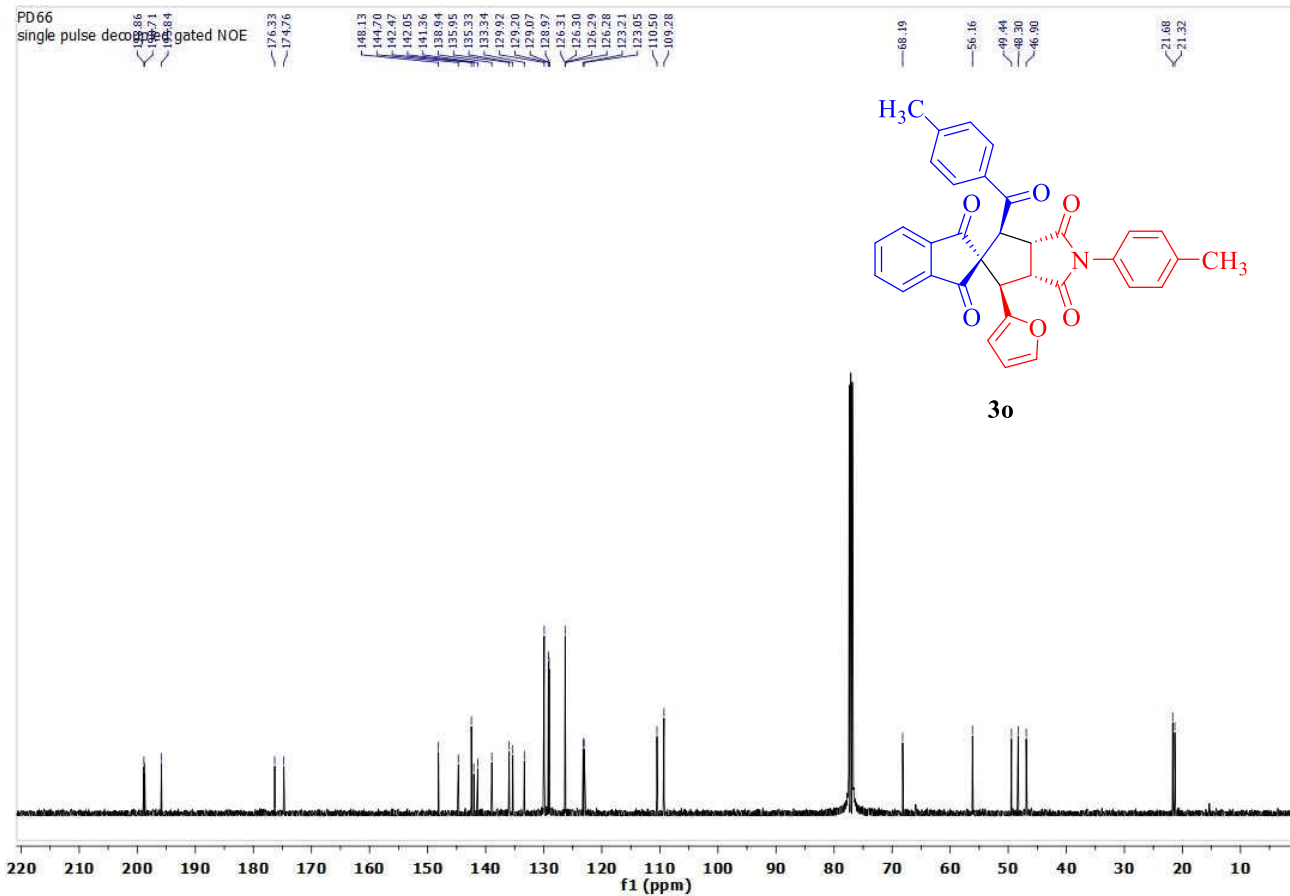

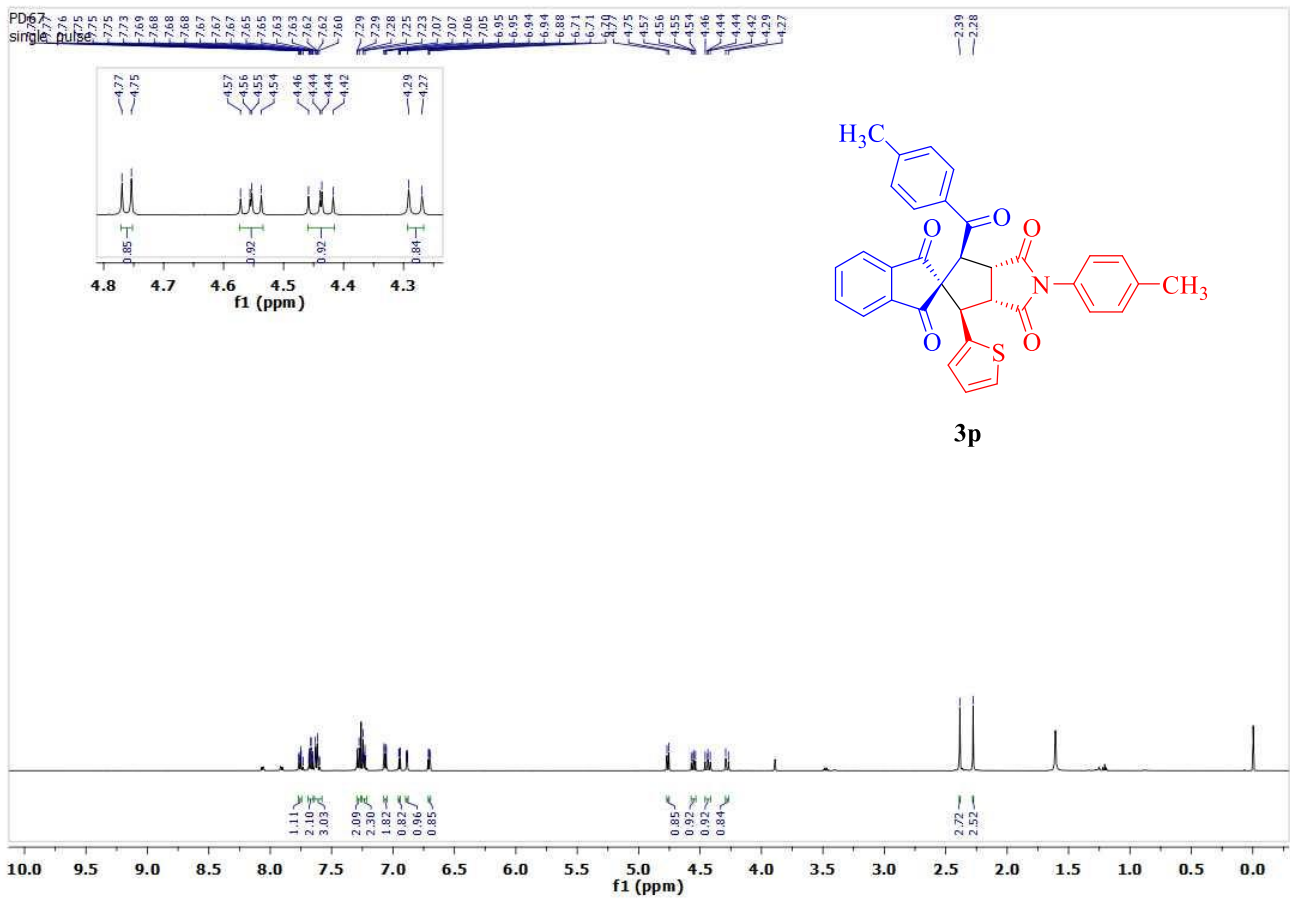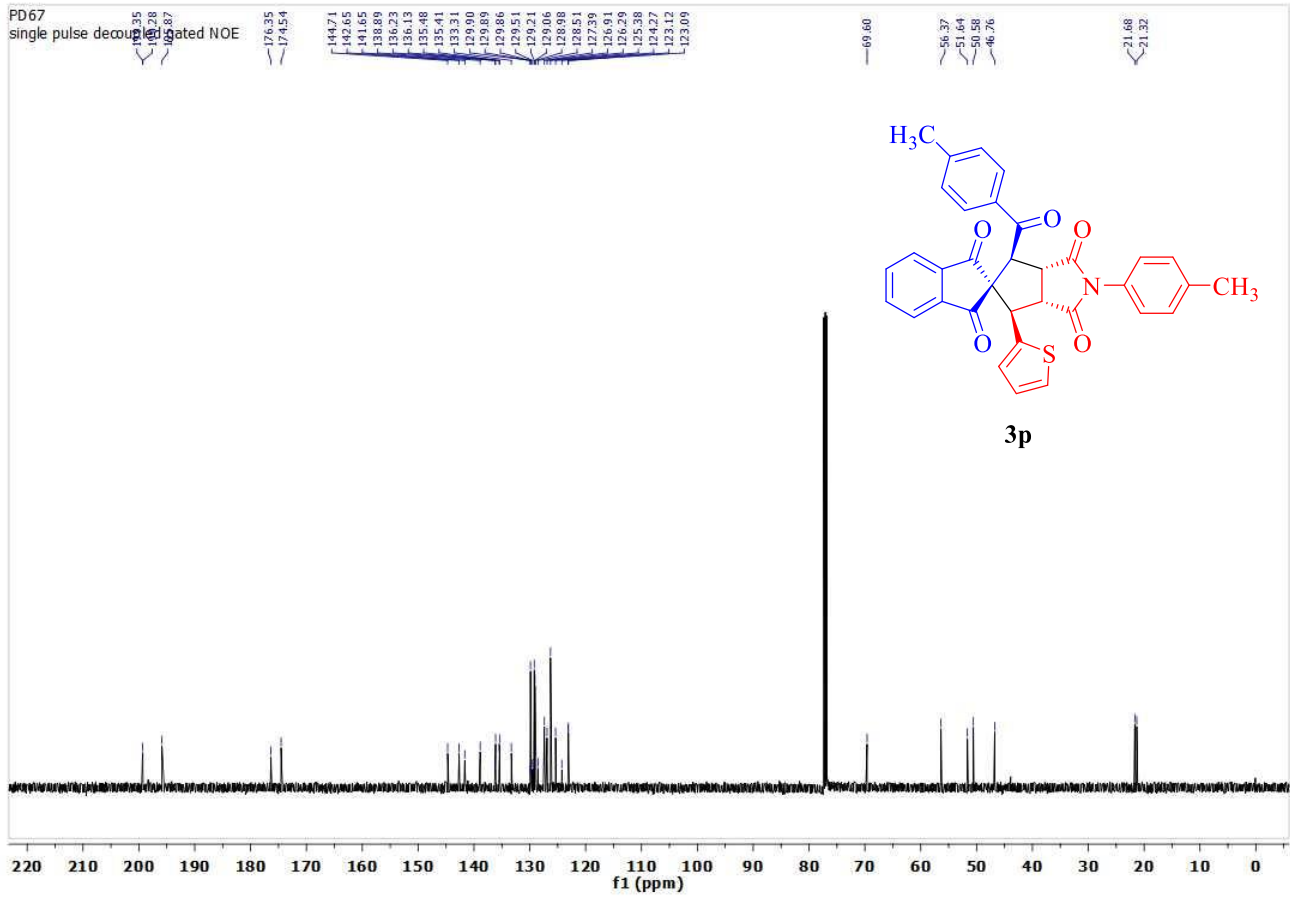

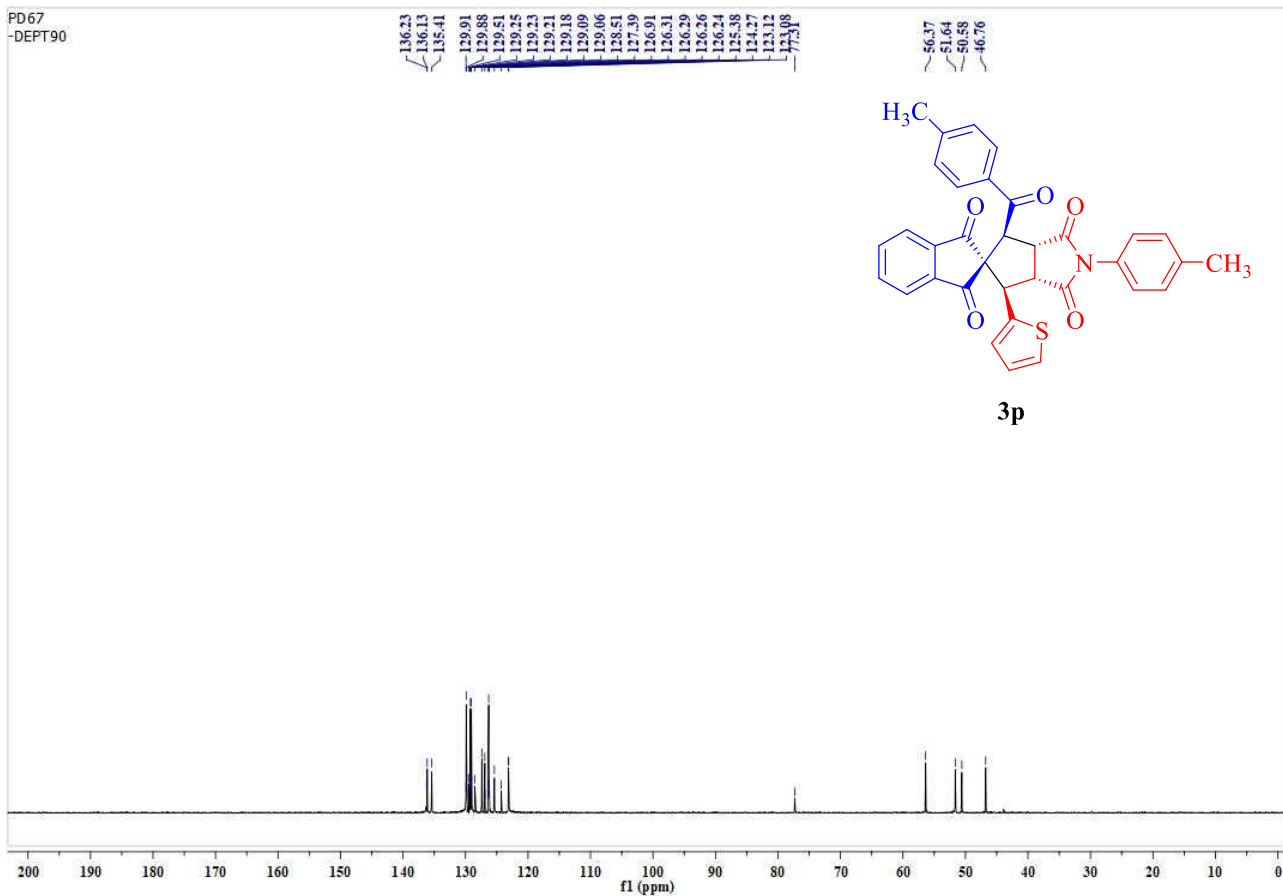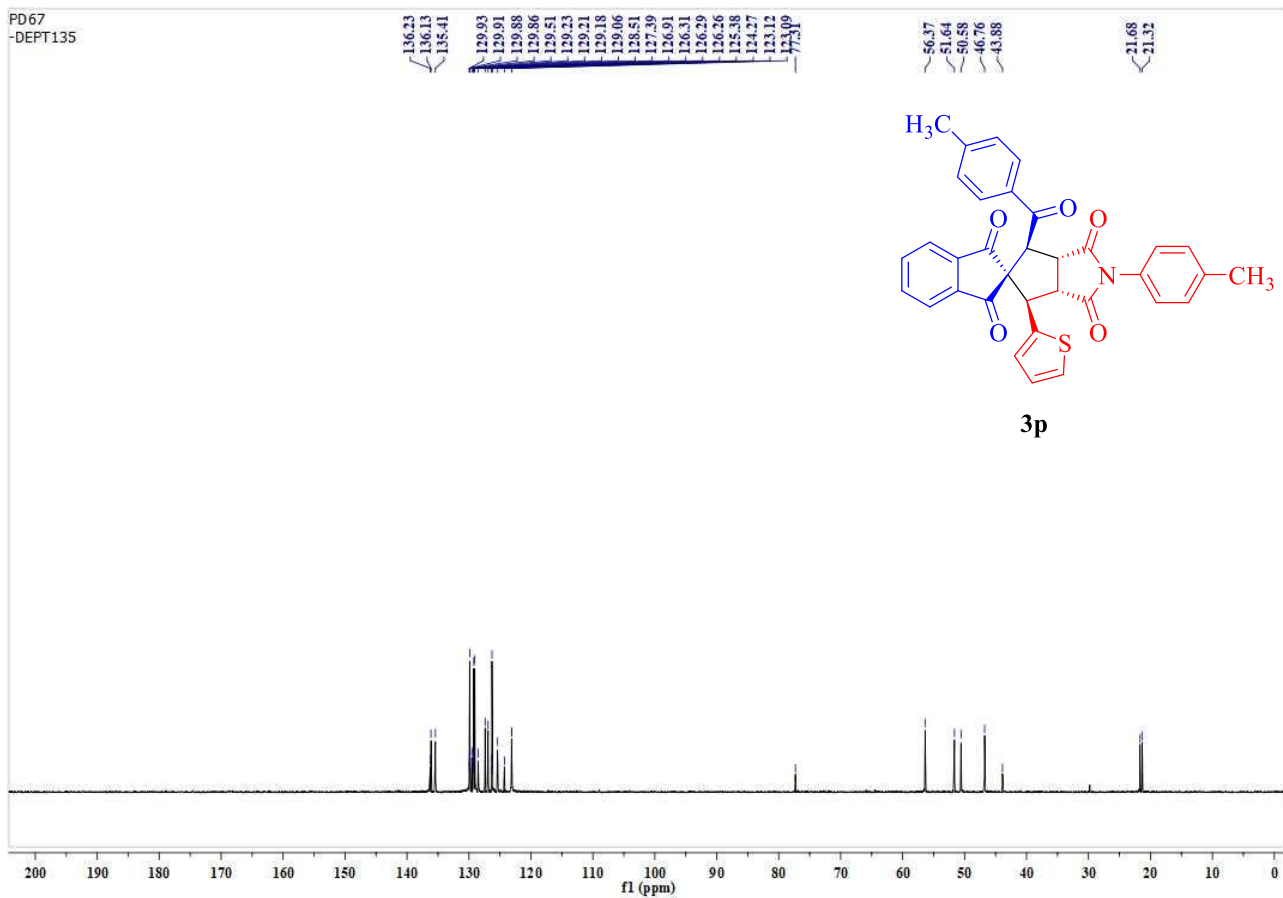

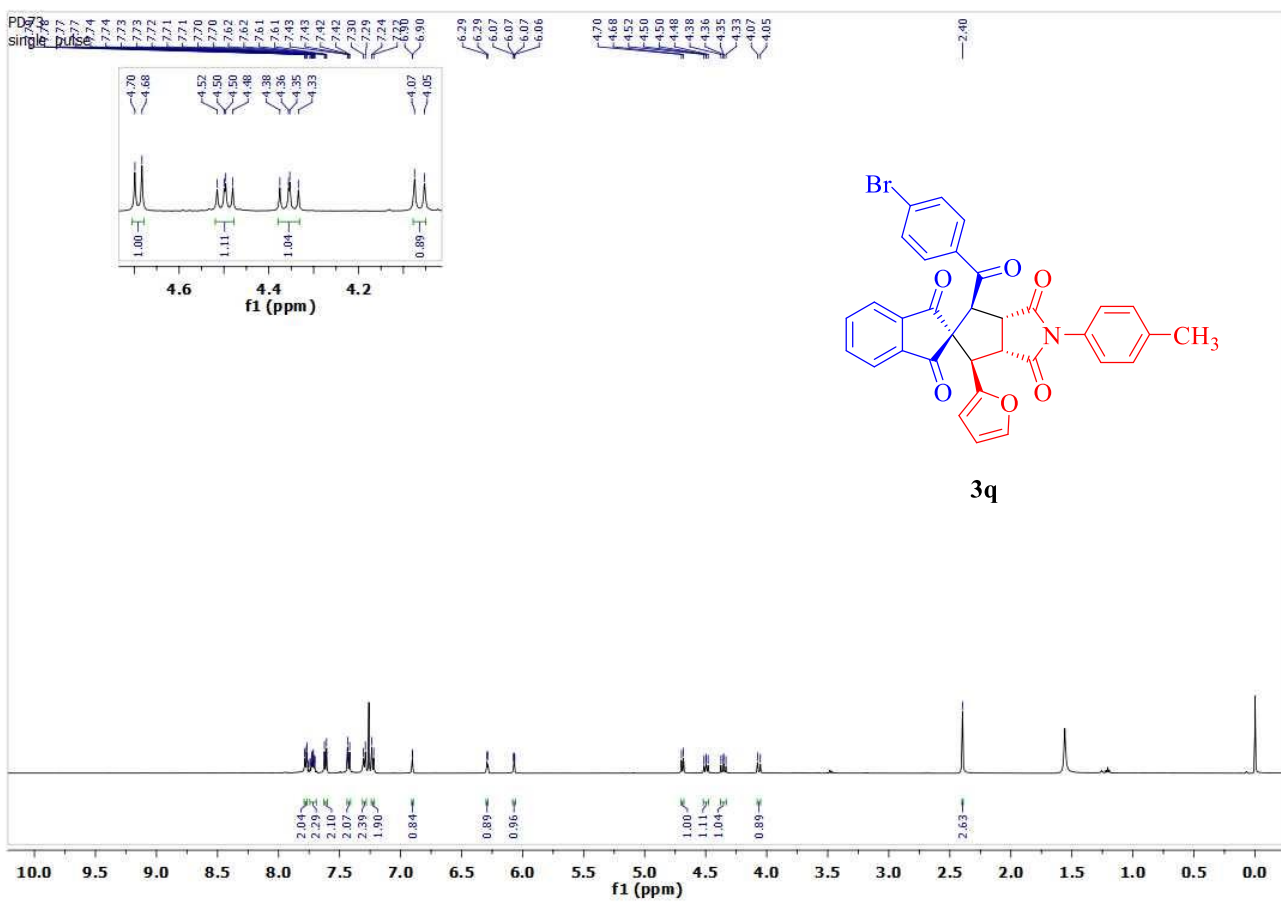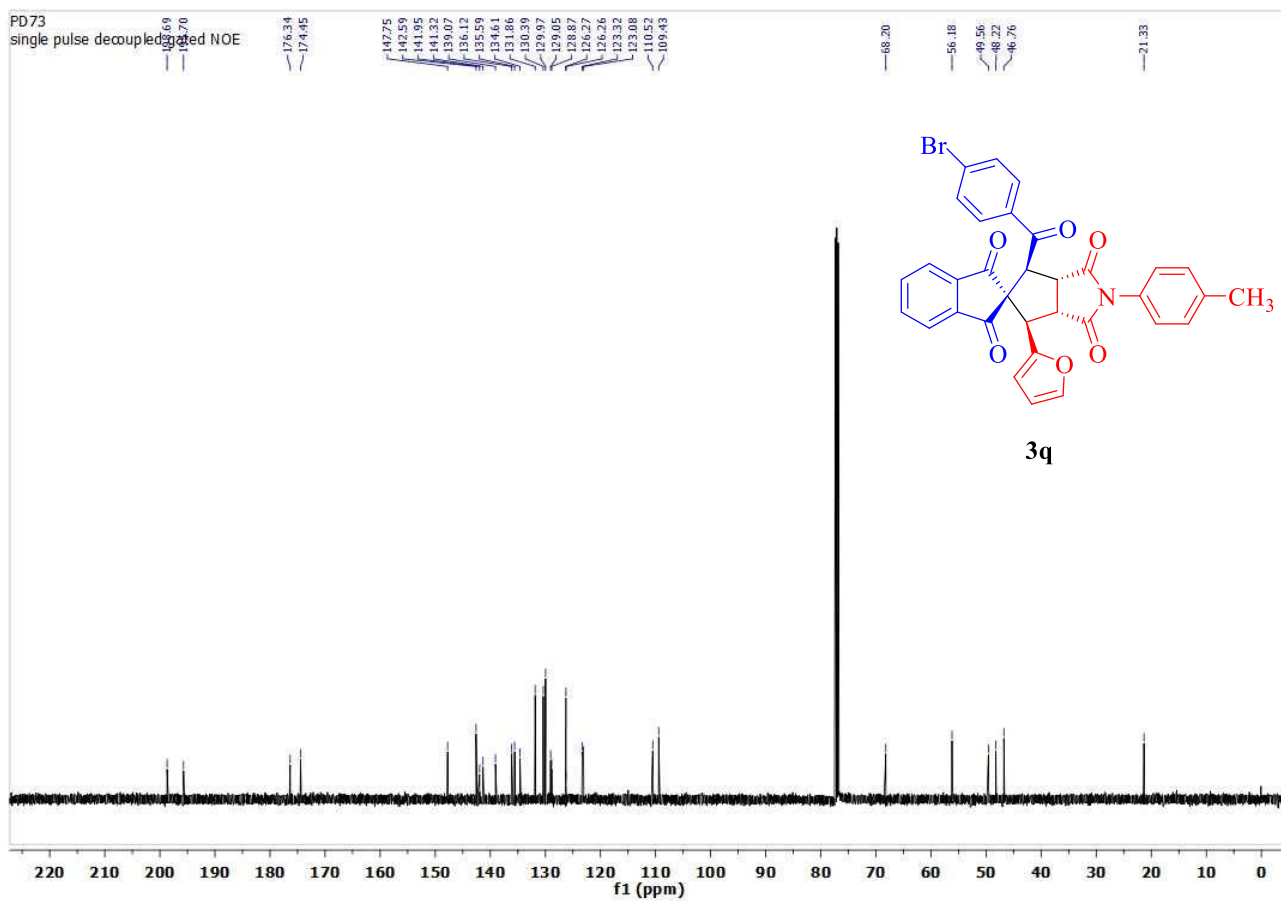





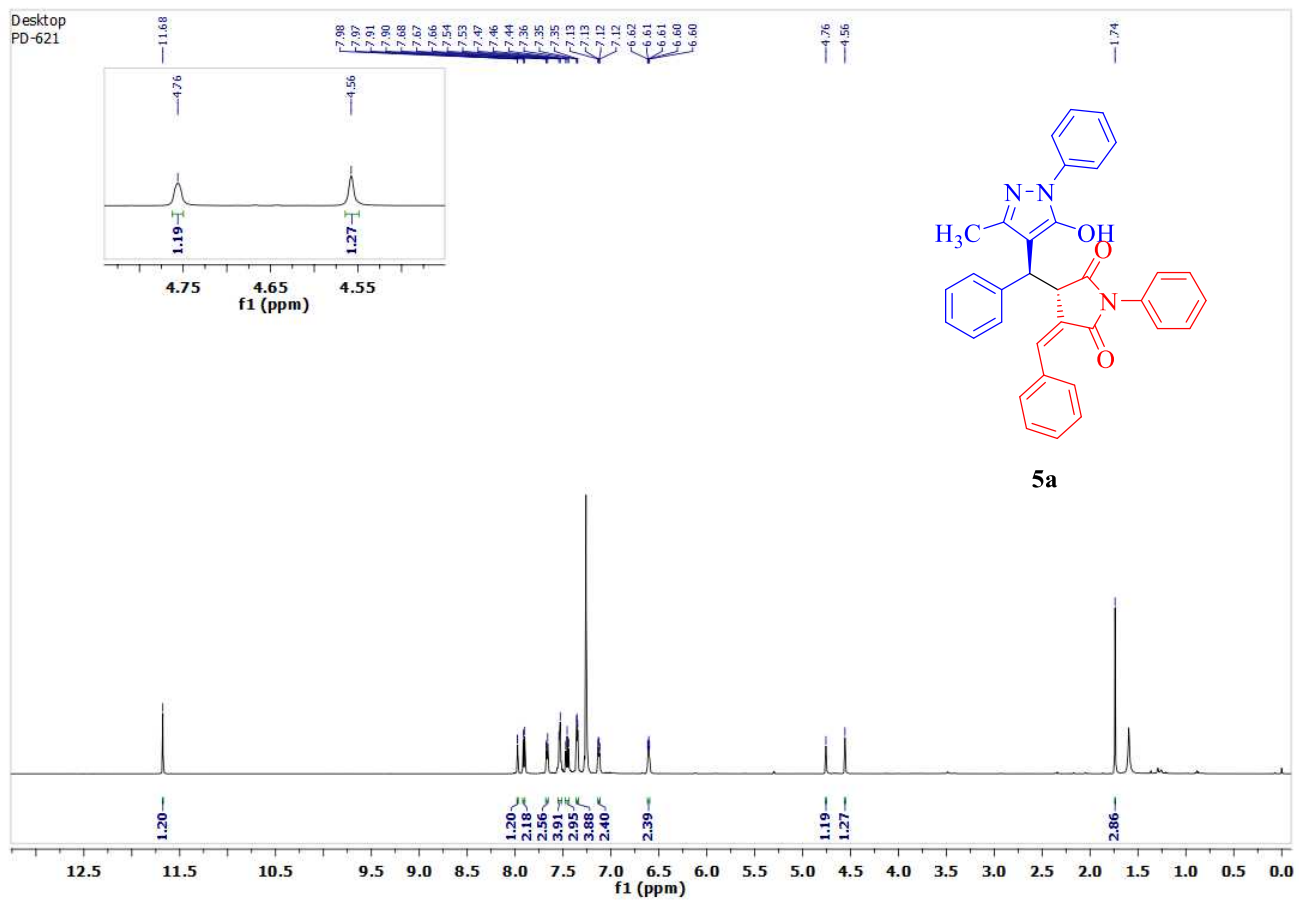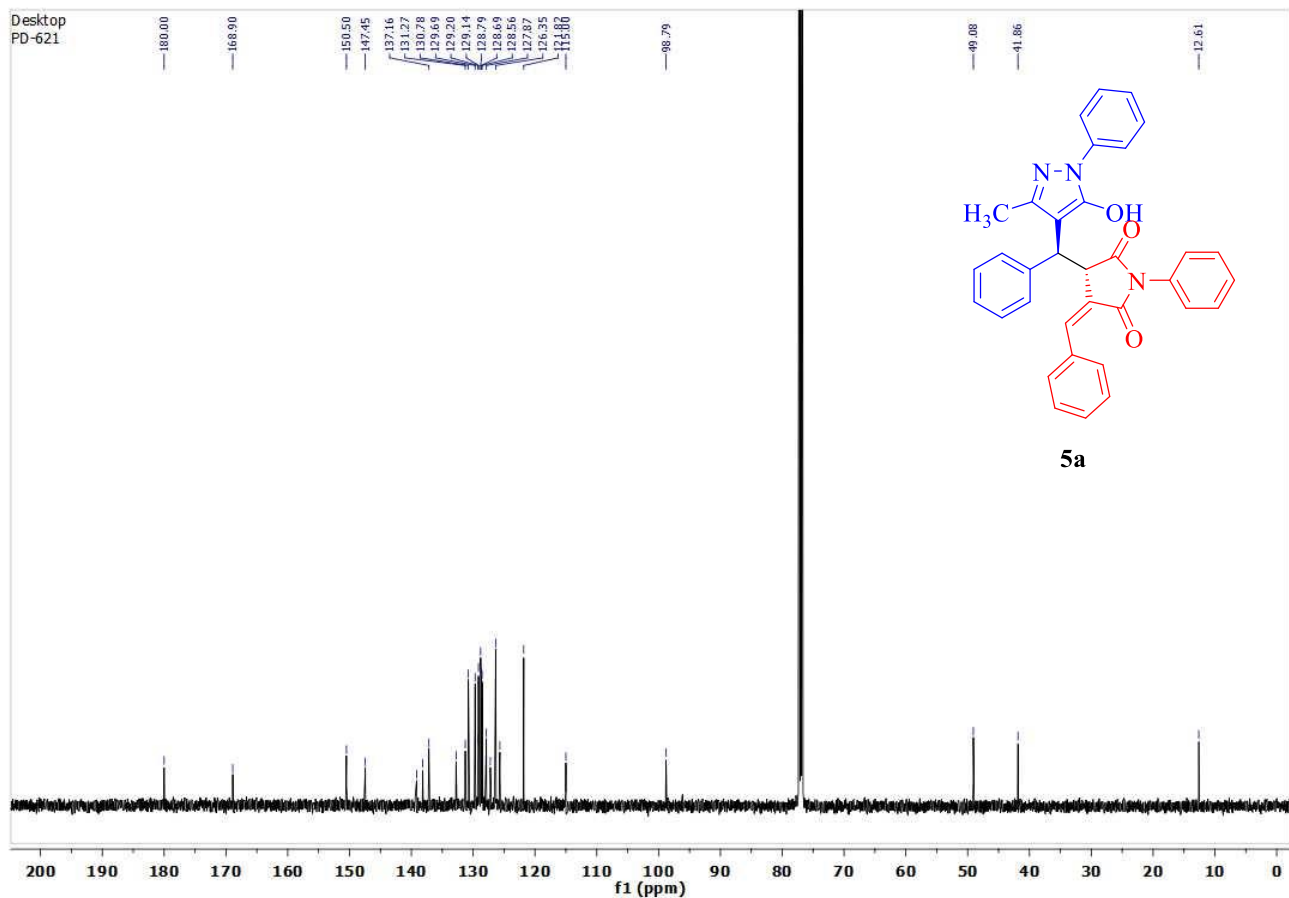

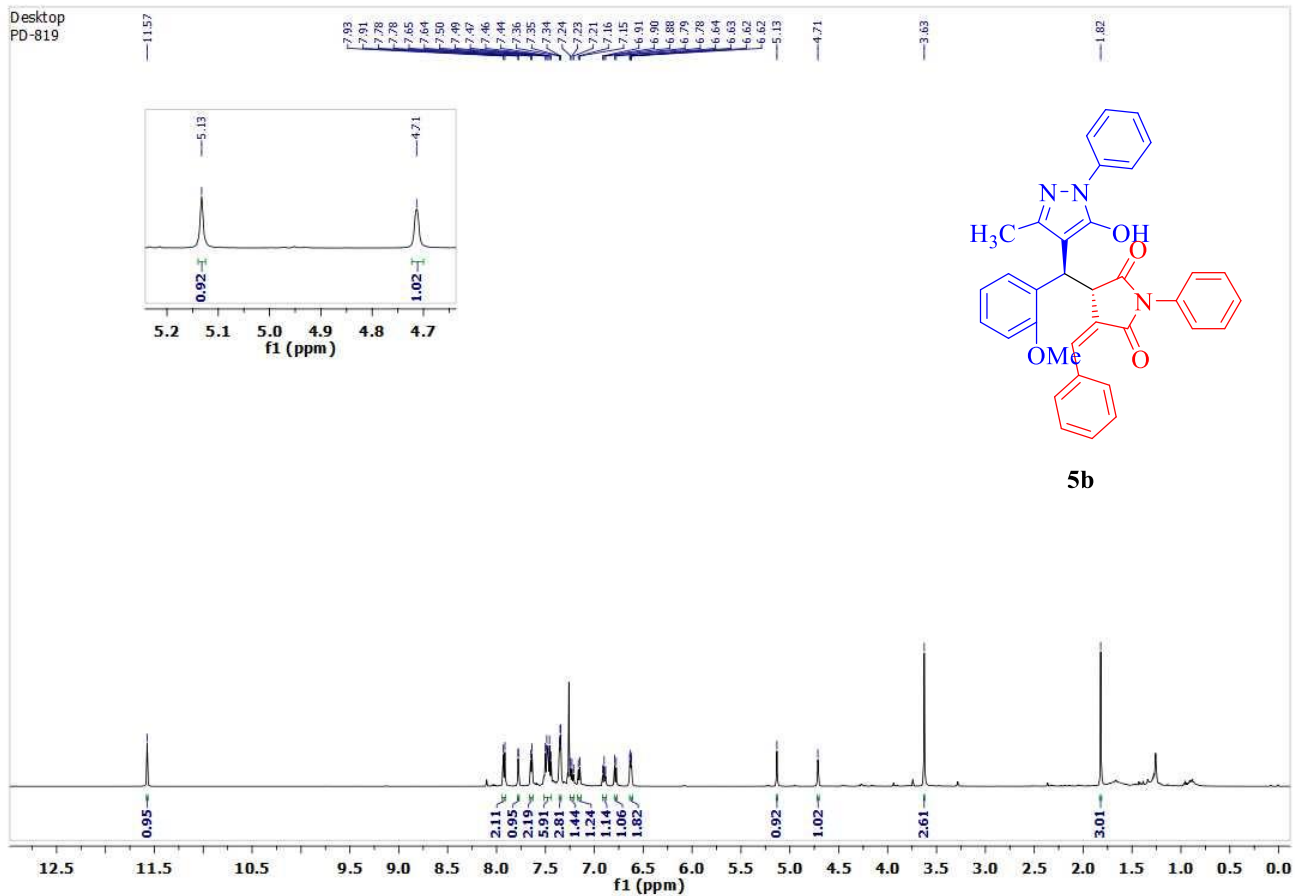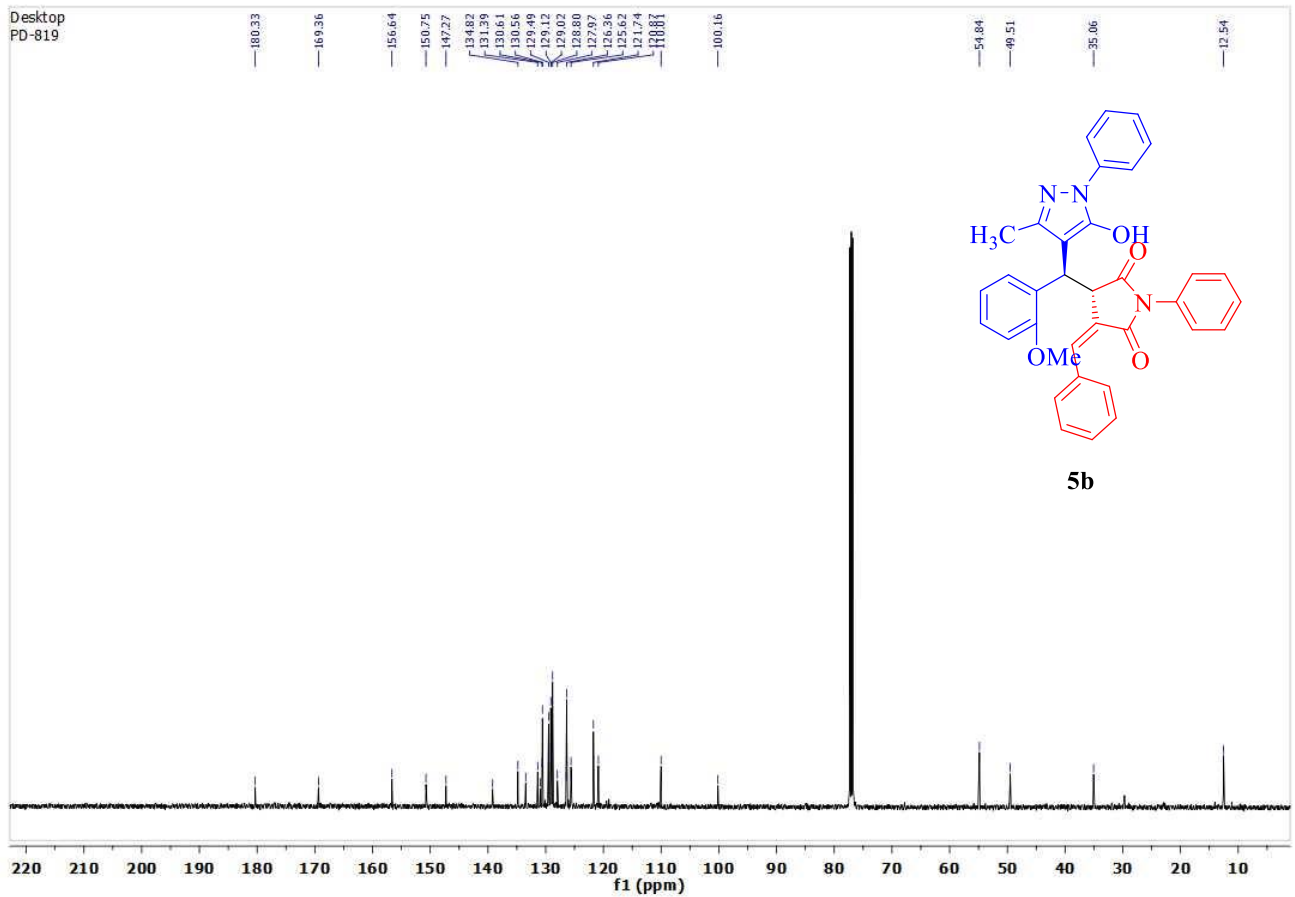

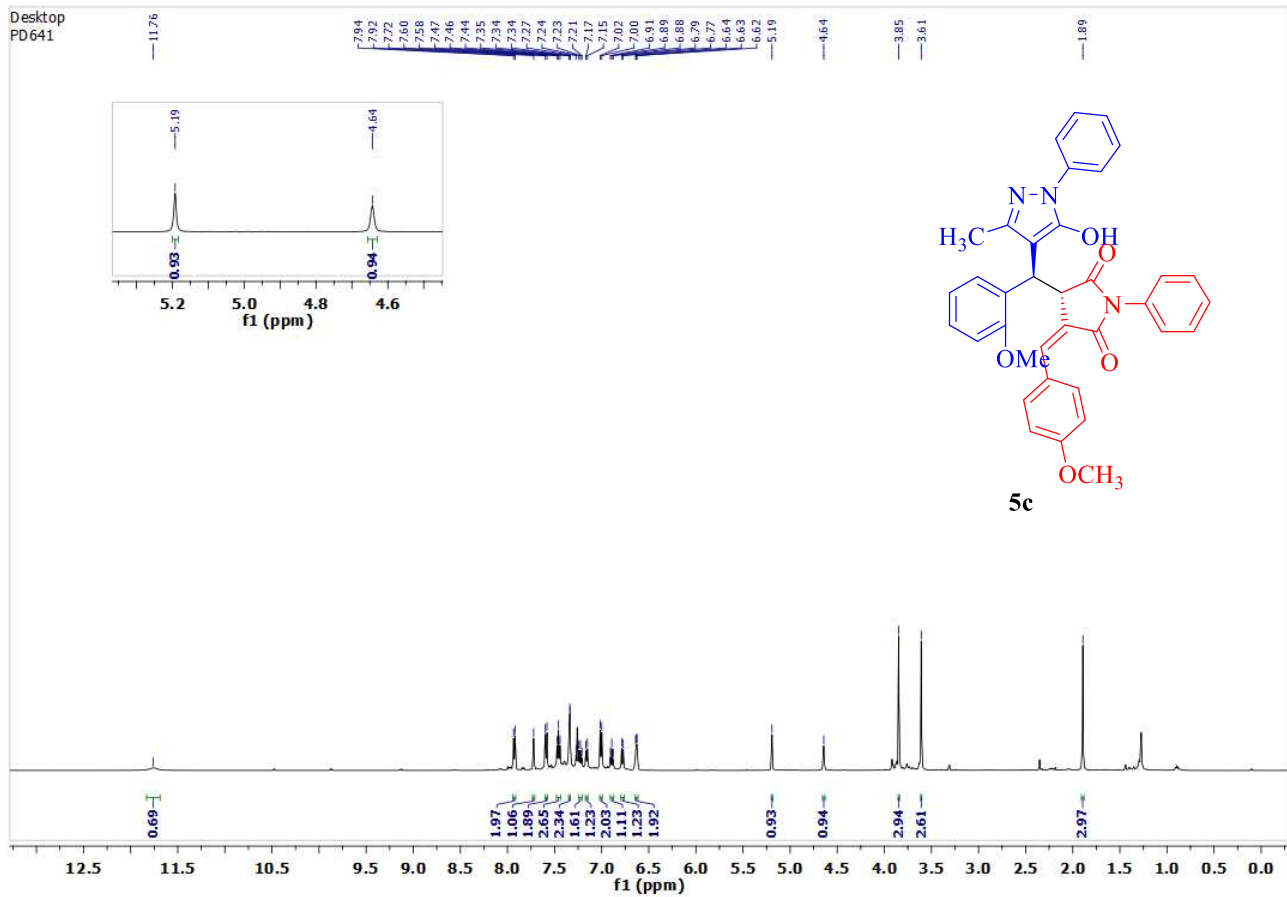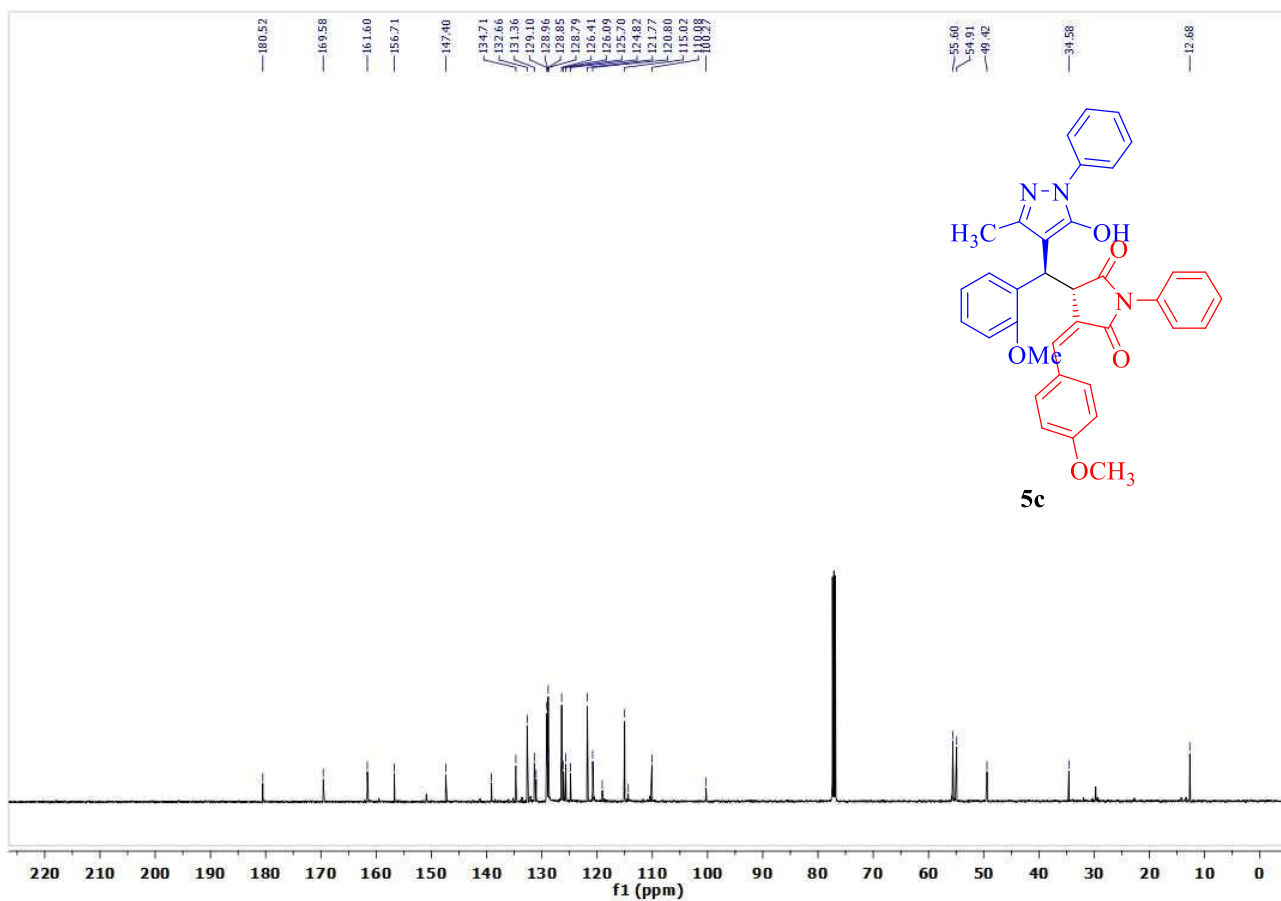

Desktop  
PD-817

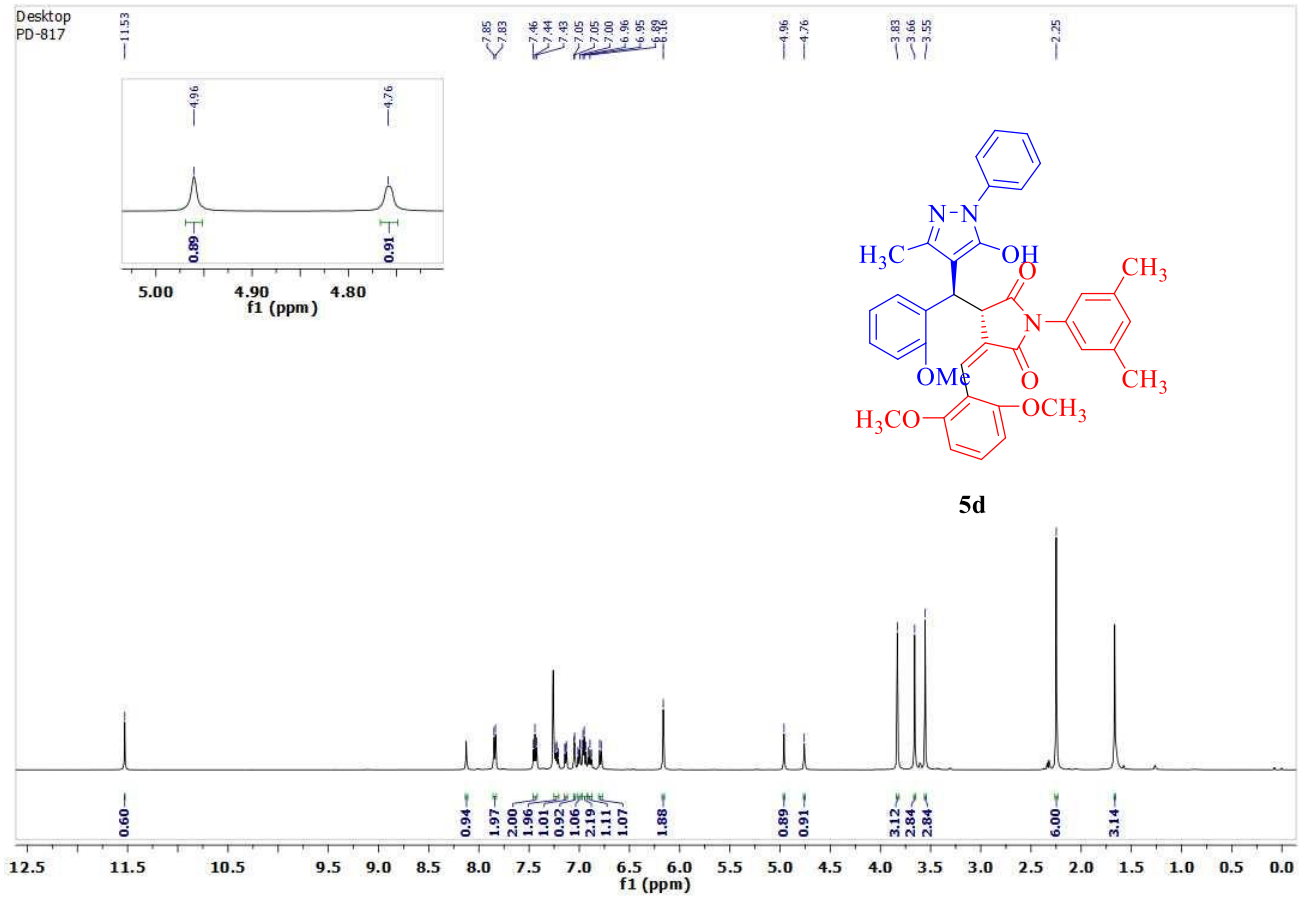

Desktop  
PD-817

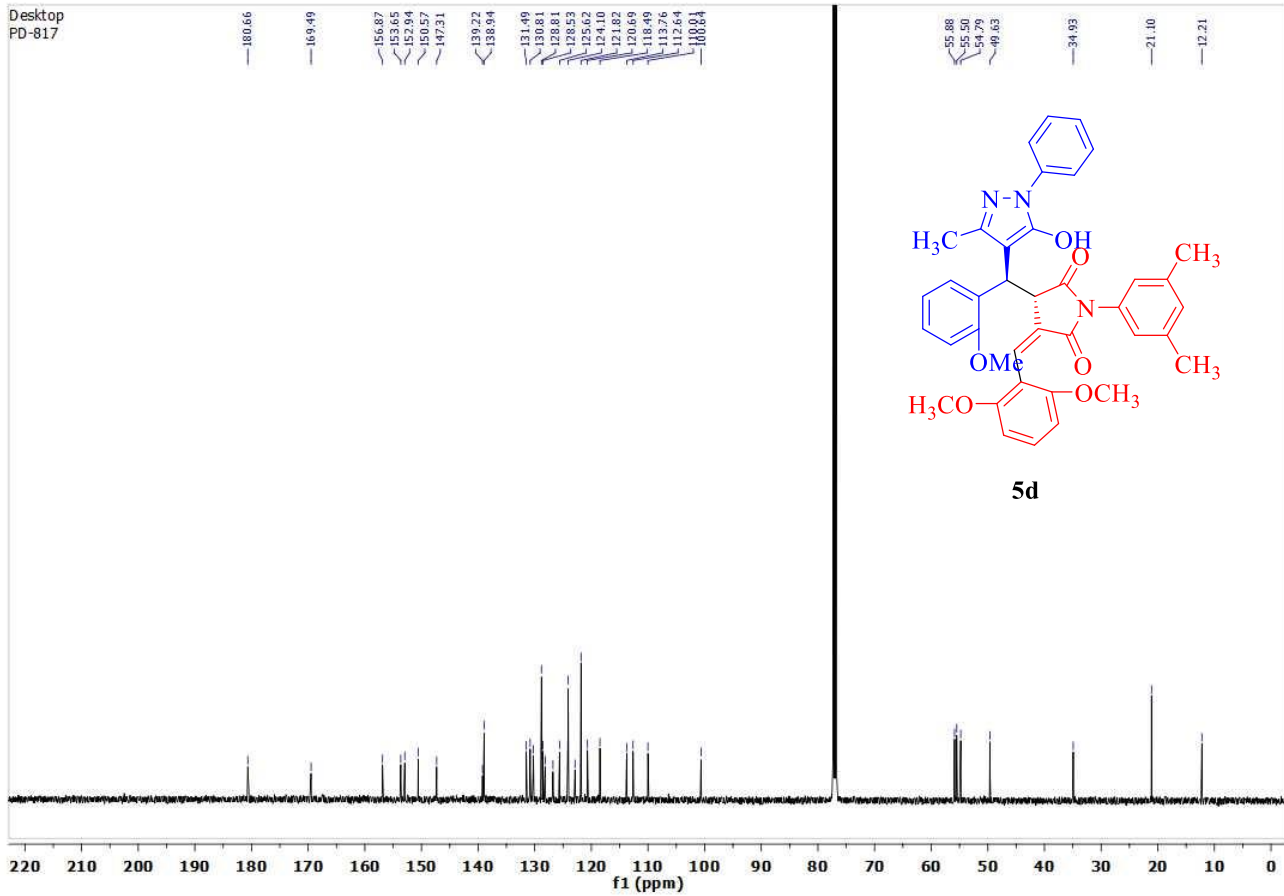

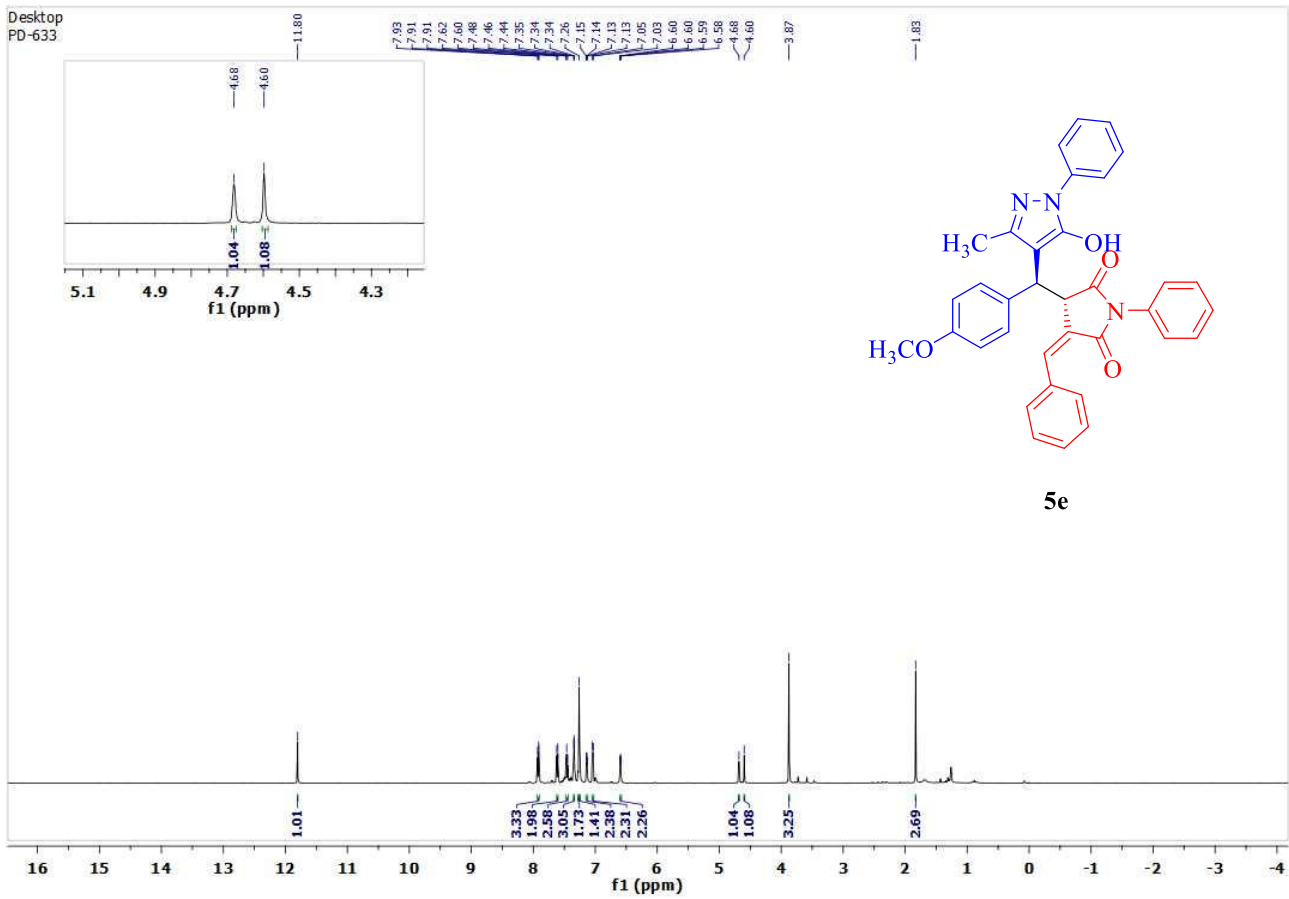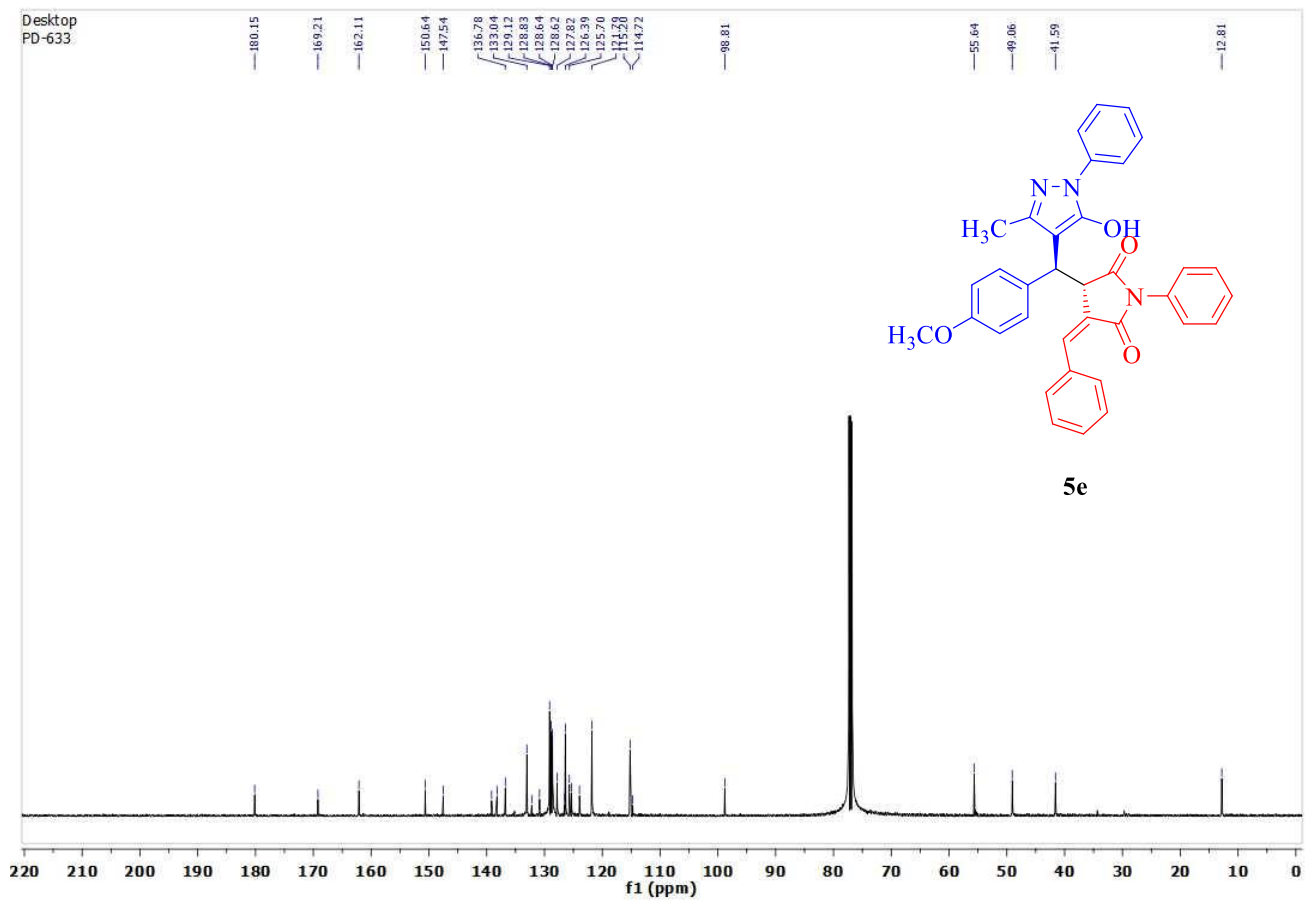

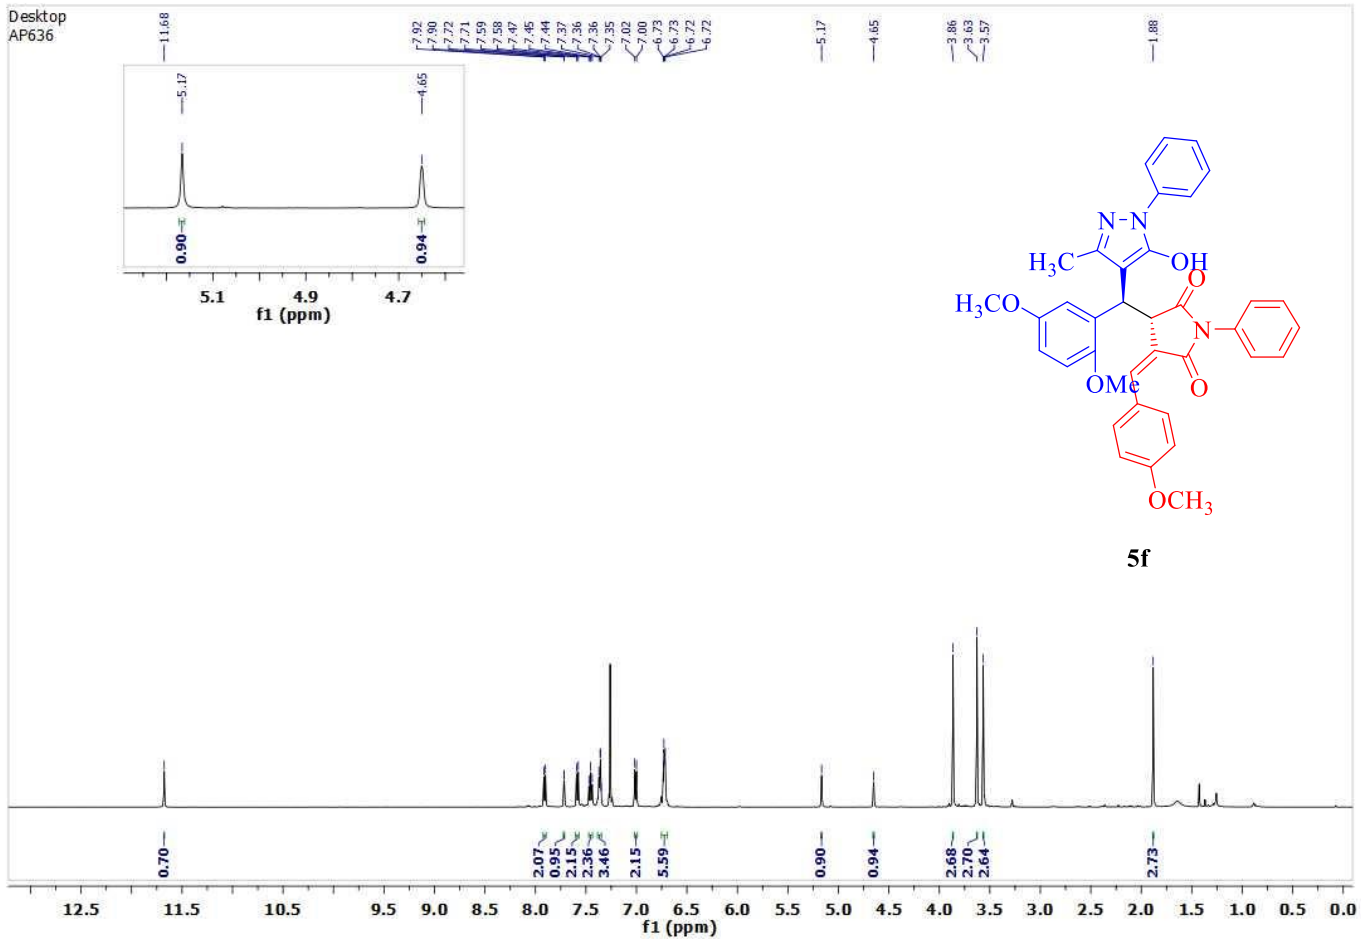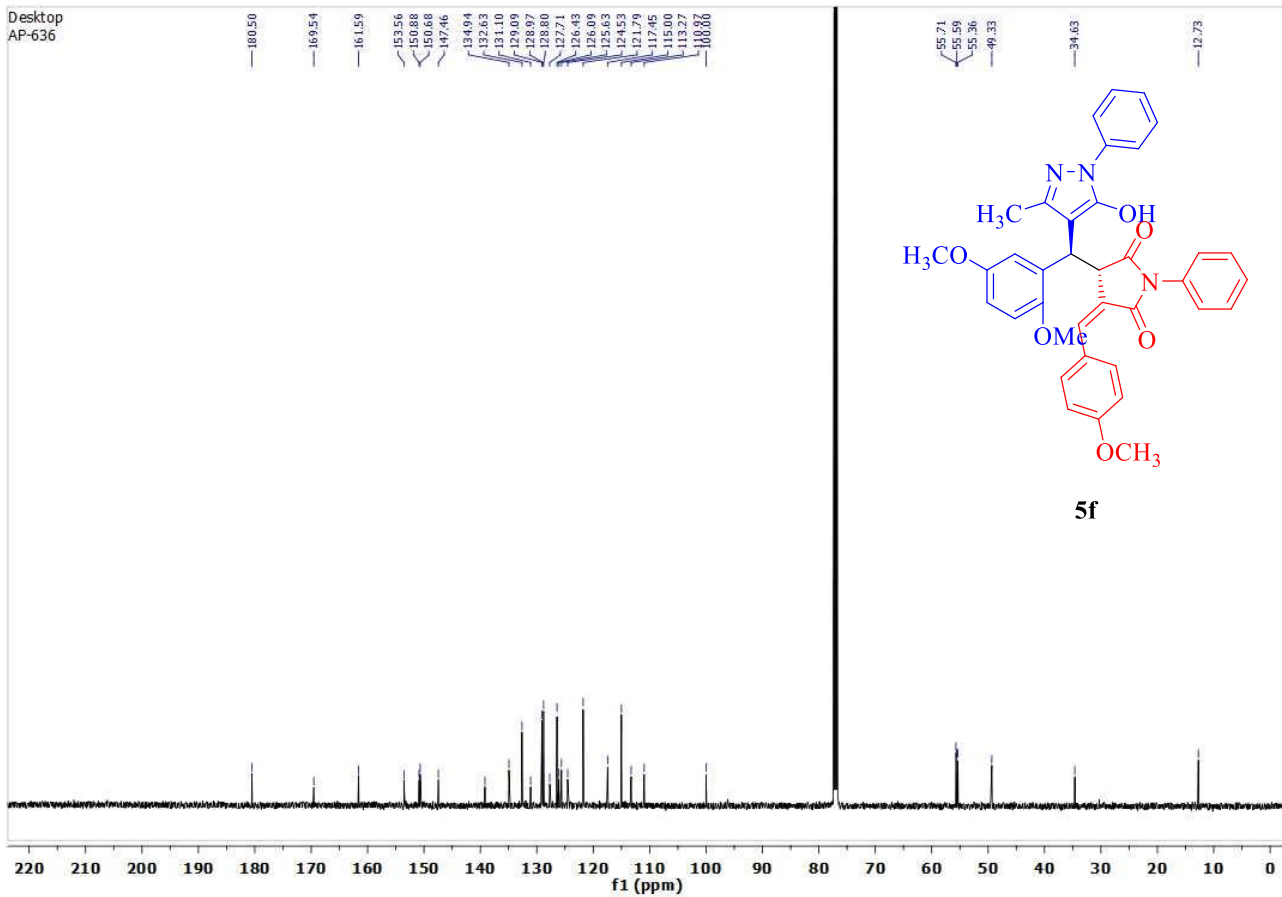

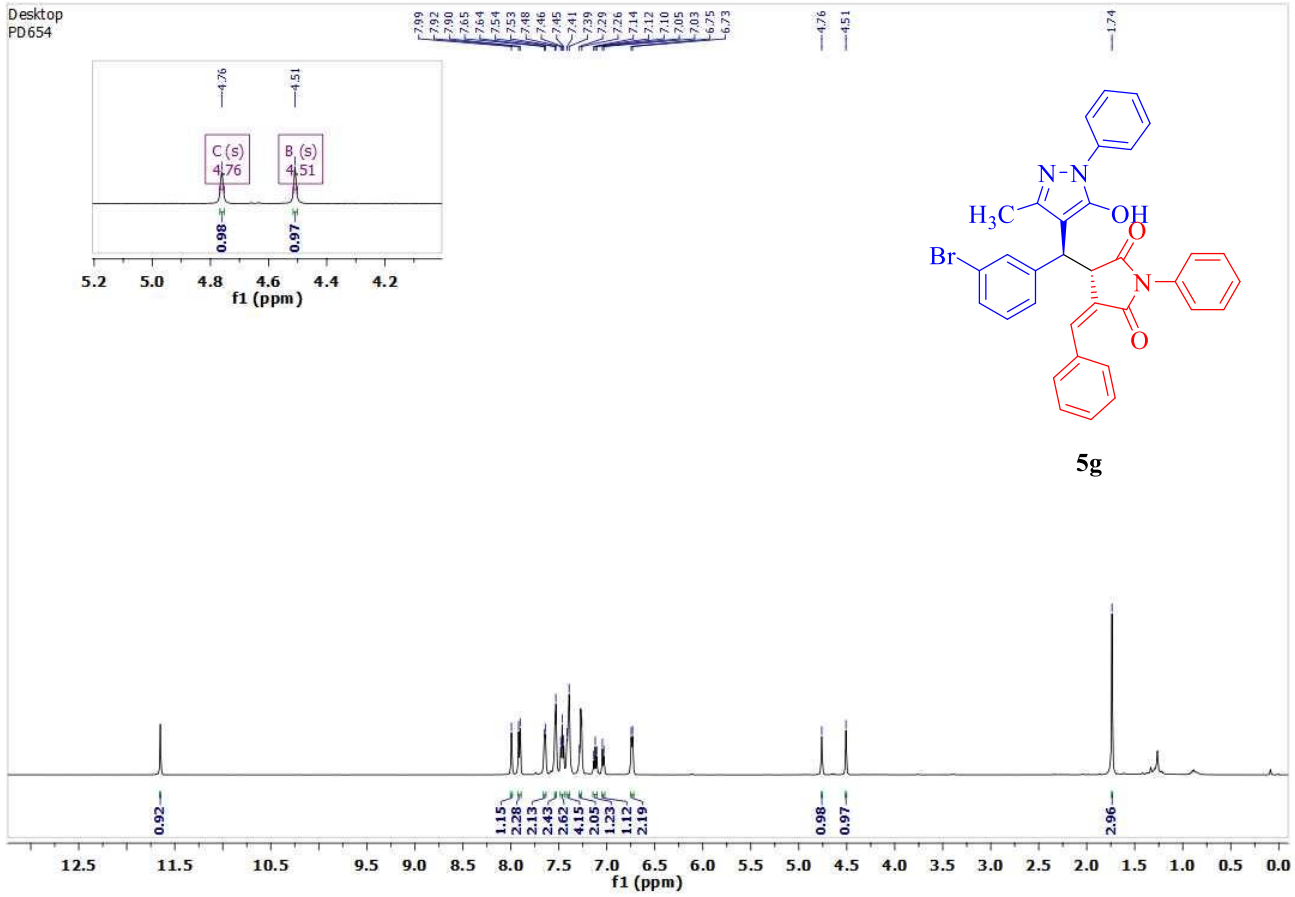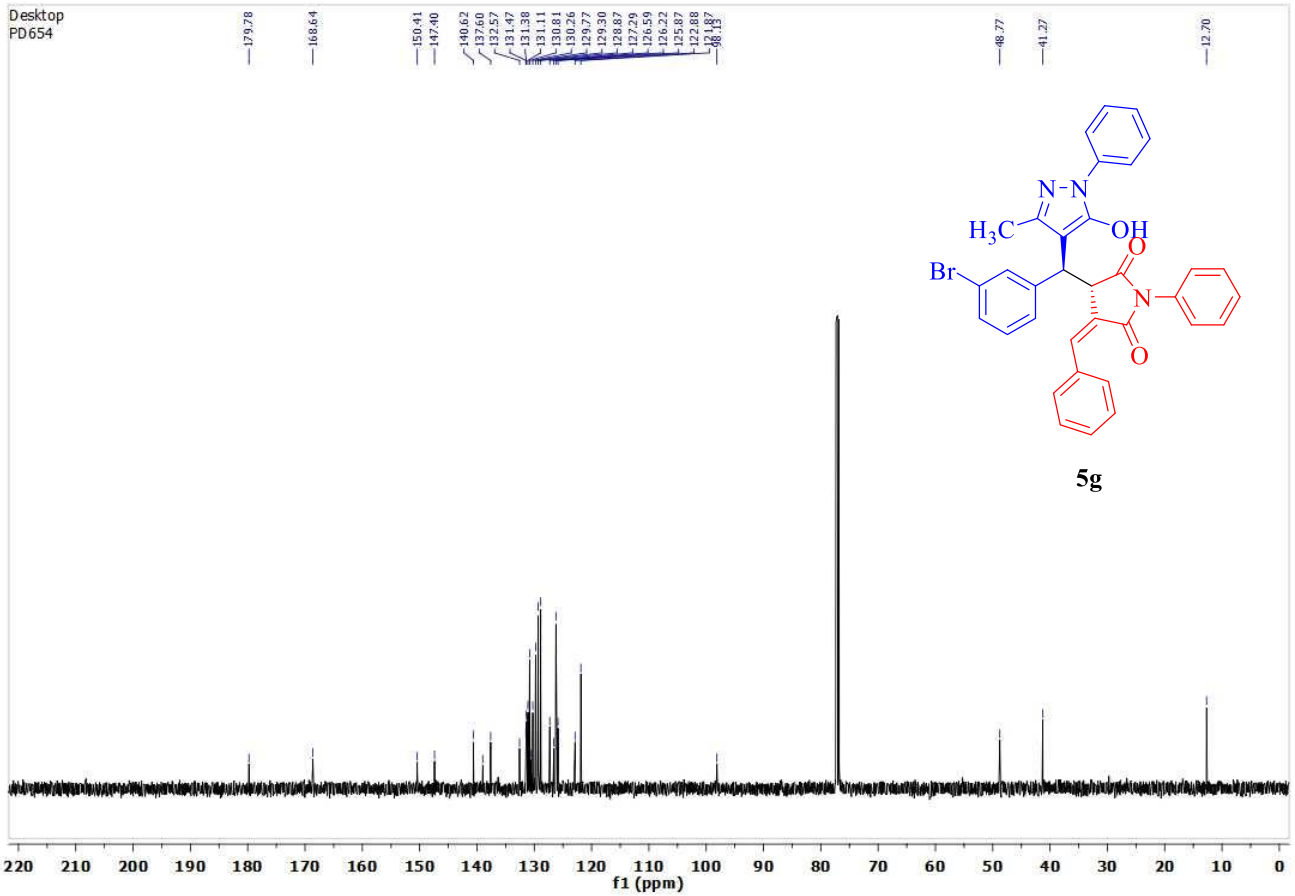



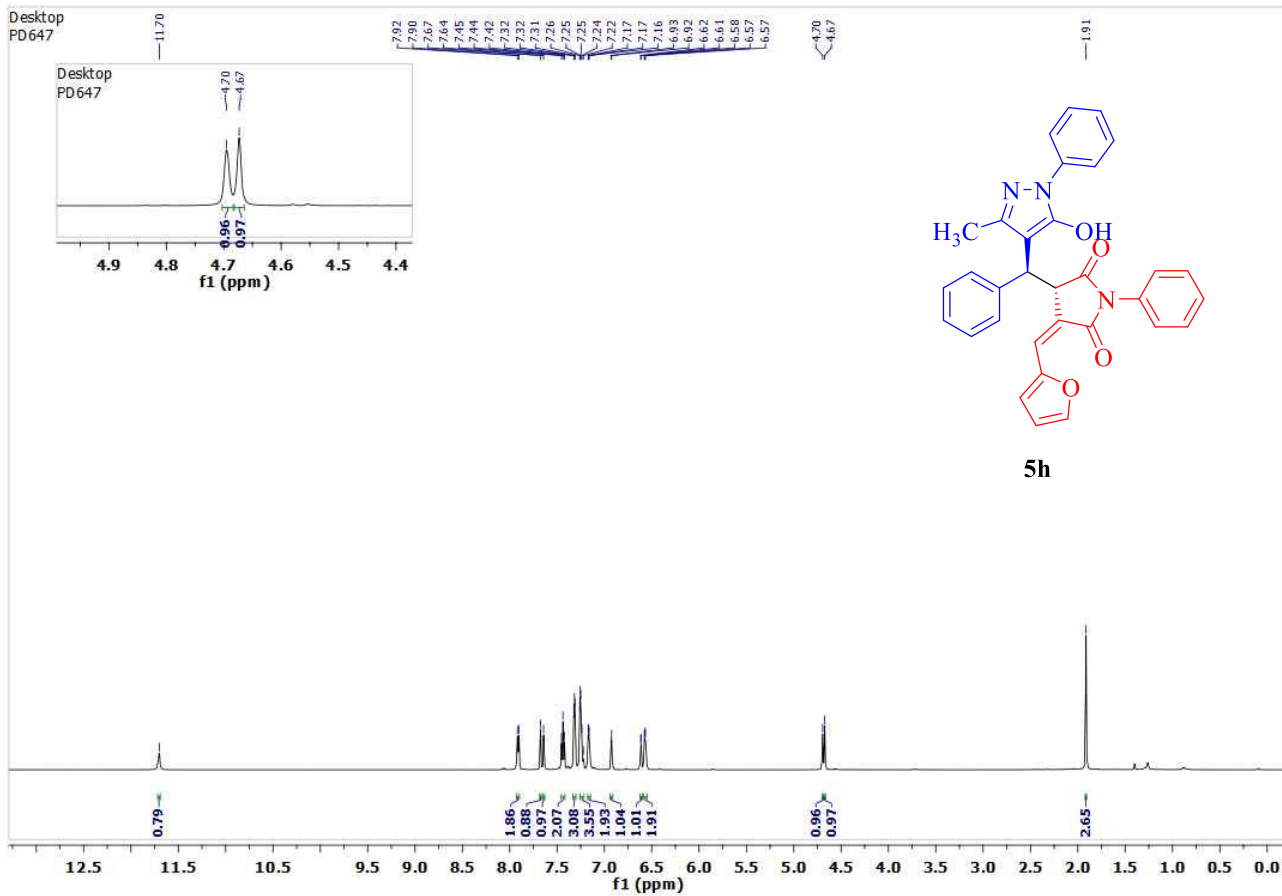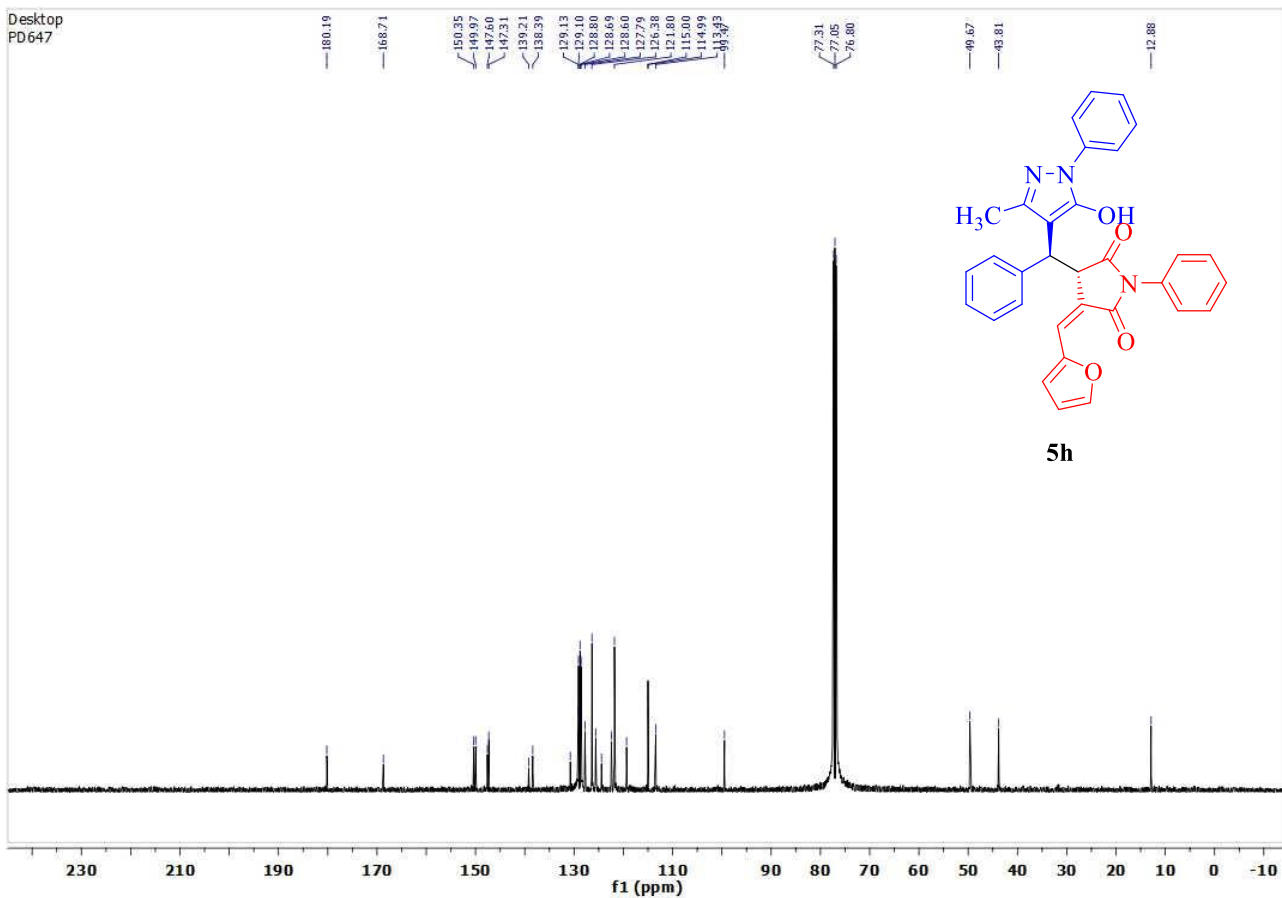

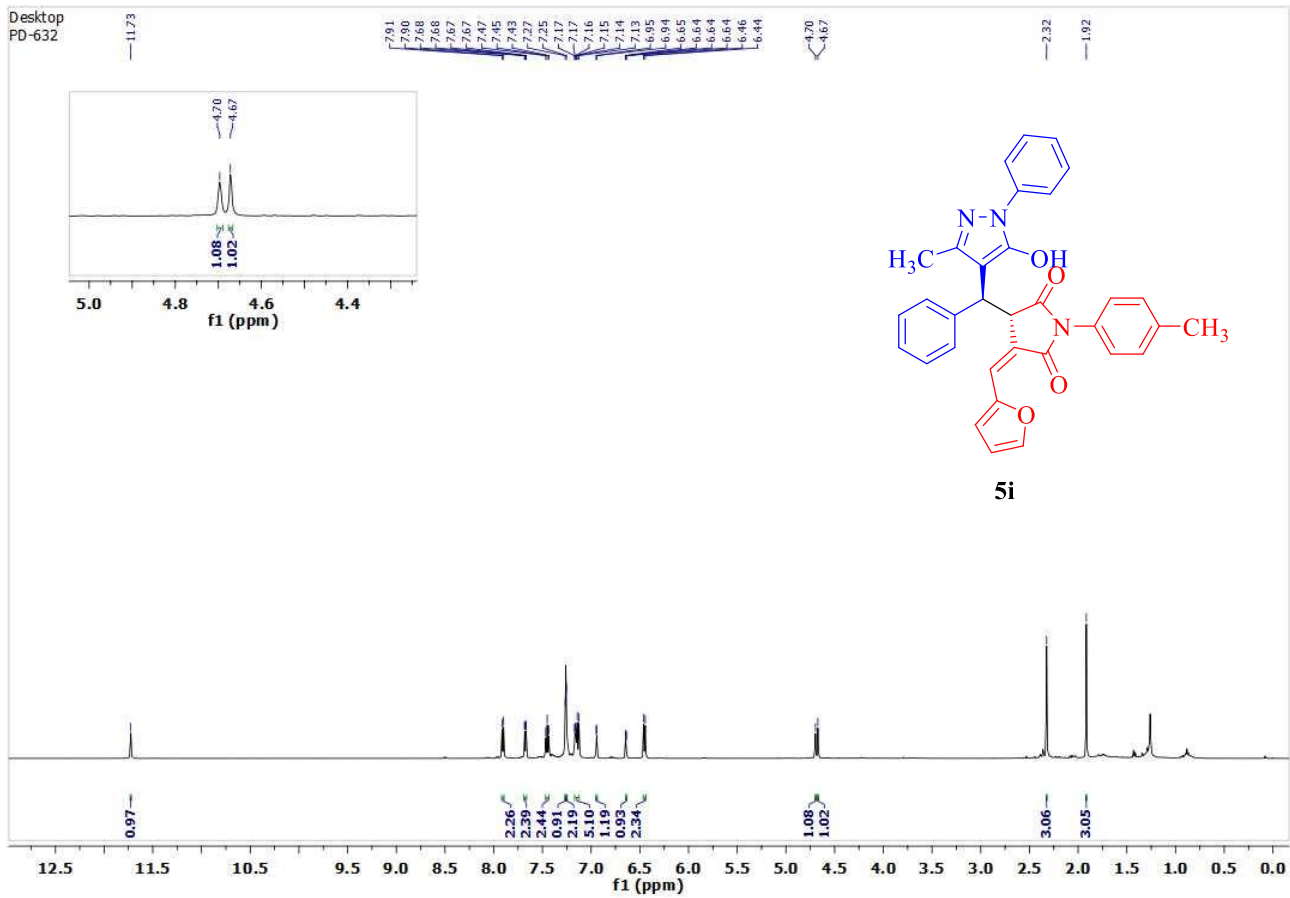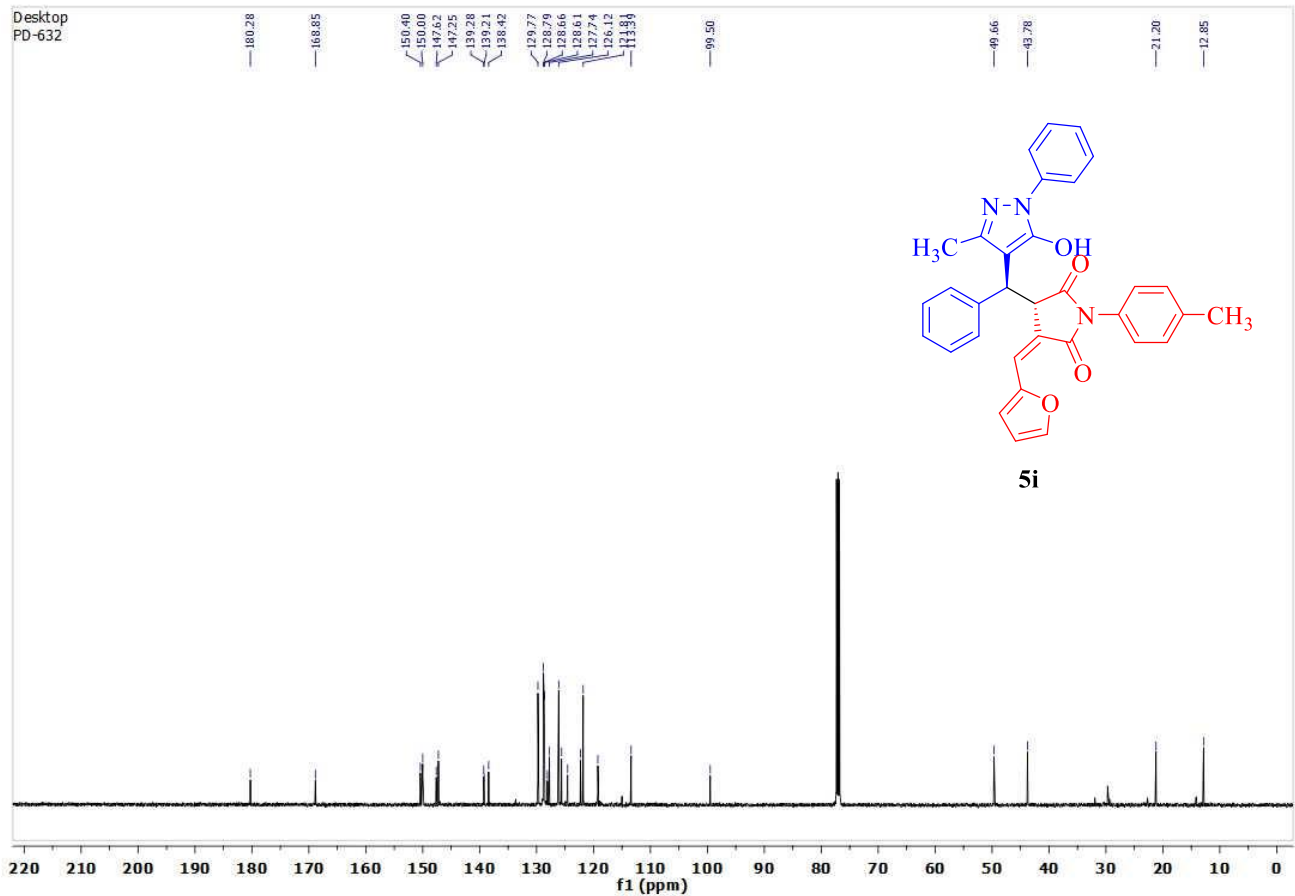

Desktop  
PD651

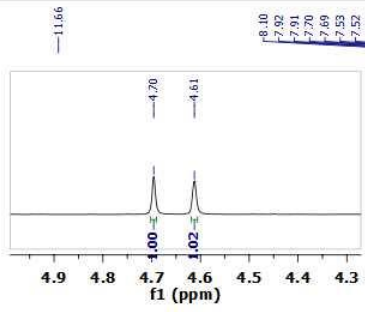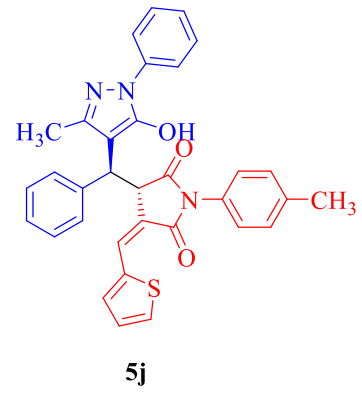

5j

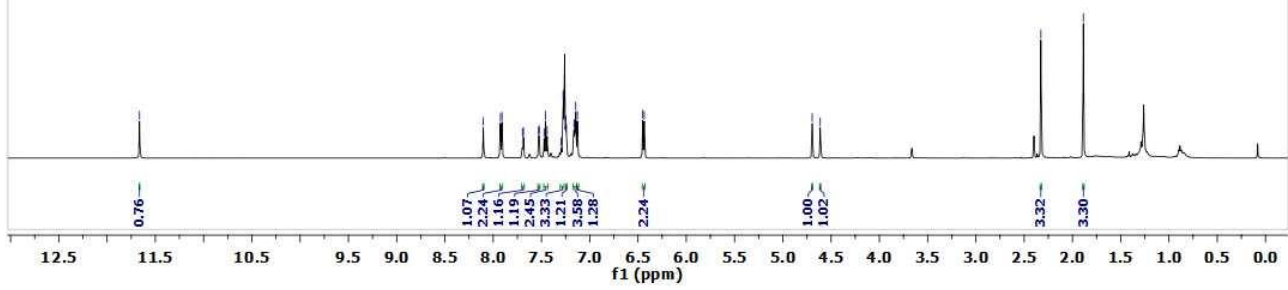

PD651-D  
single\_pulse

8.10 8.10 8.10 7.91 7.91 7.91 7.90 7.90 7.90 7.89 7.89 7.70 7.69 7.53 7.53 7.47 7.47 7.47 7.46 7.46 7.45 7.45 7.44 7.44 7.44 7.27 7.27 7.25 7.25 7.24 7.24 7.16 7.16 7.15 7.15 7.15 7.14 7.14 7.12 7.12 4.69 4.69 4.61 4.61 2.32 2.32 1.88 1.88

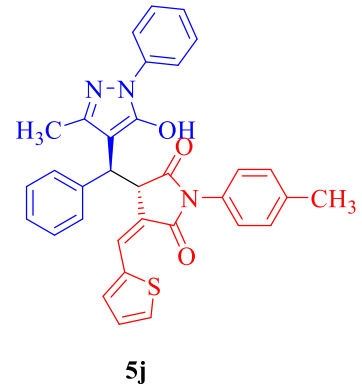

5j

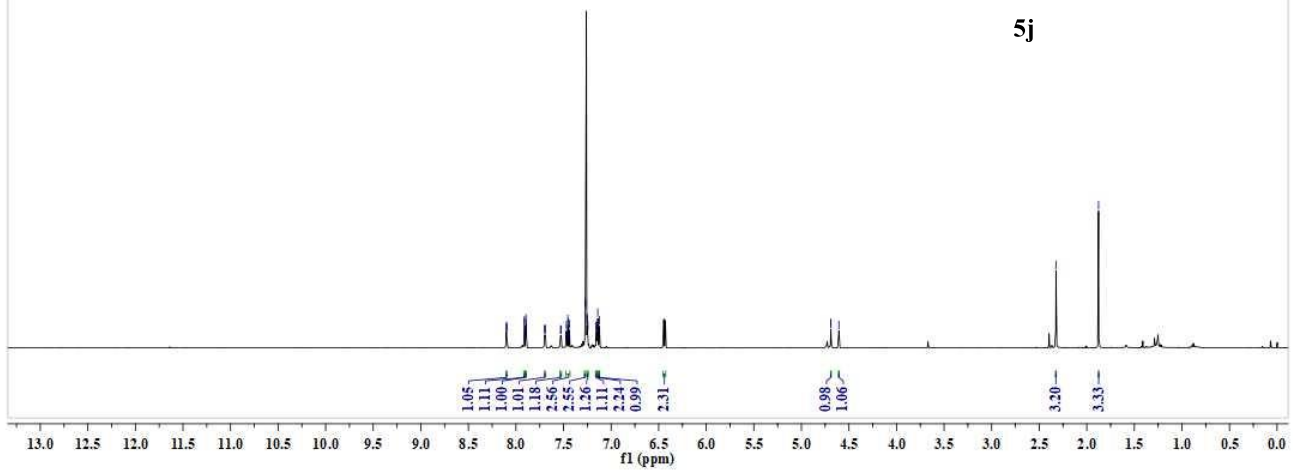

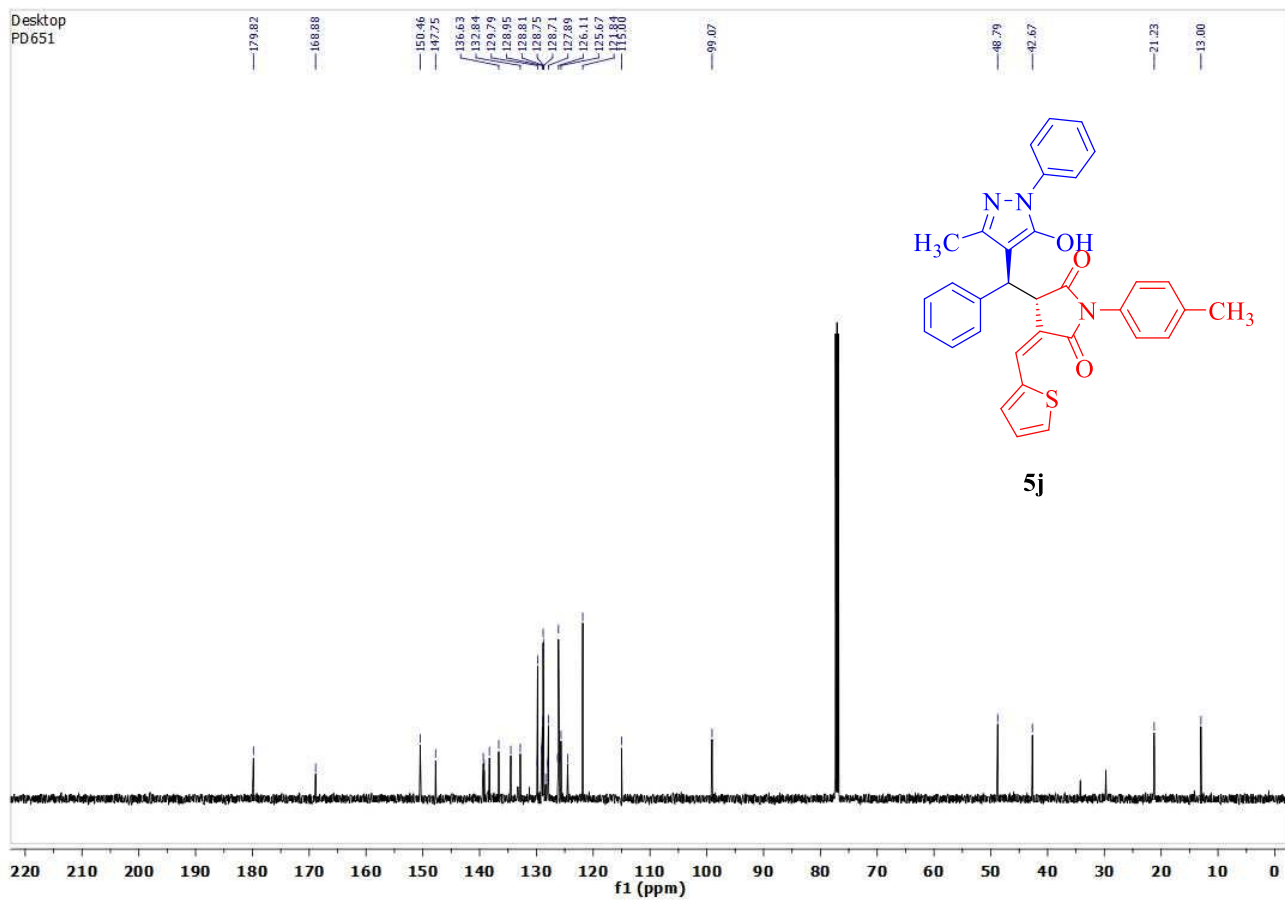

Desktop  
PD646

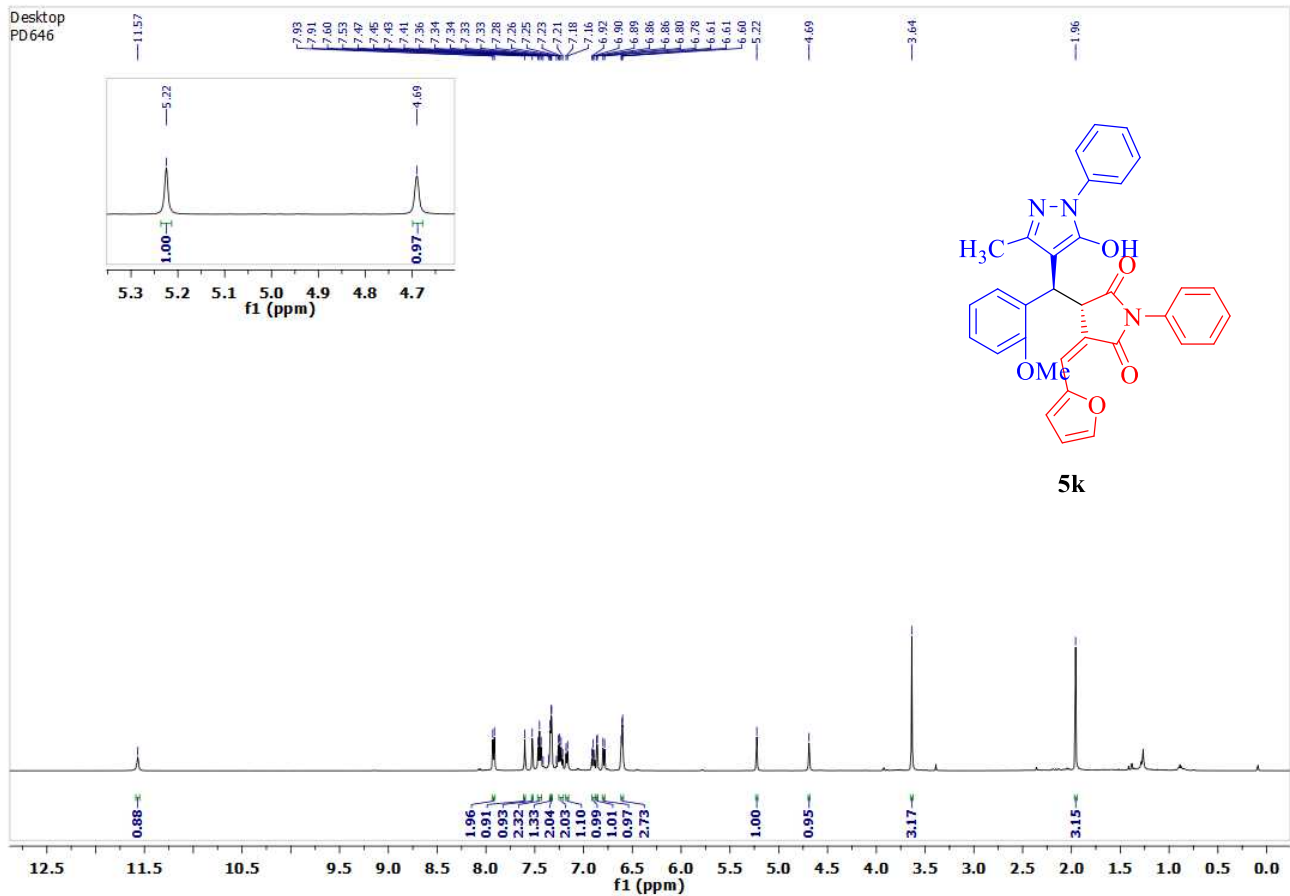

Desktop  
PD646

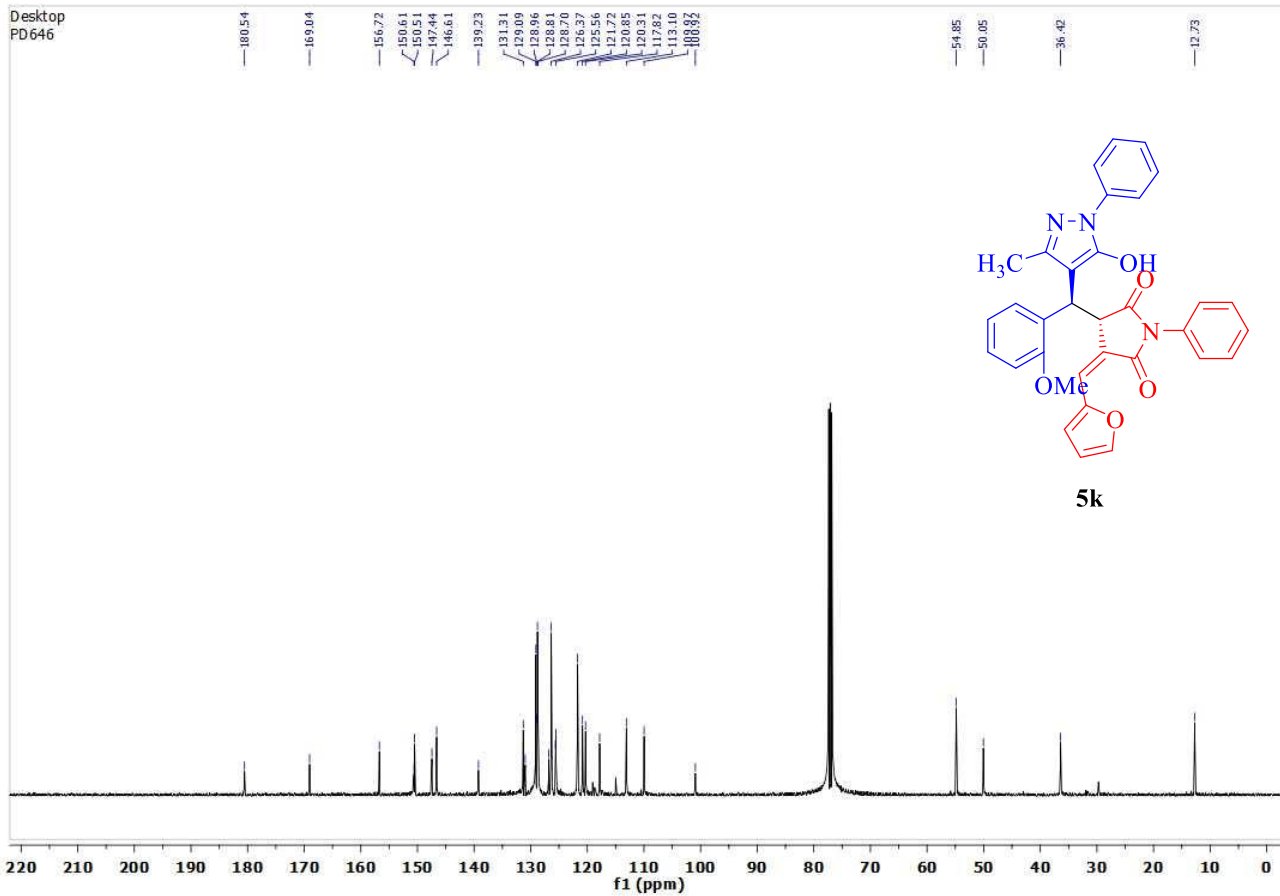

Desktop  
PD-639

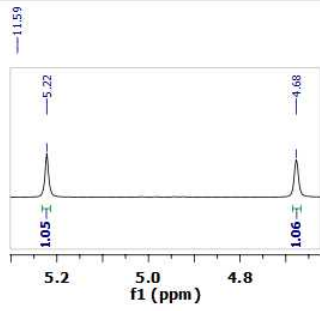

7.33  
7.31  
7.60  
7.52  
7.51  
7.46  
7.43  
7.24  
7.17  
7.15  
6.85  
6.60  
6.50  
5.22  
4.68

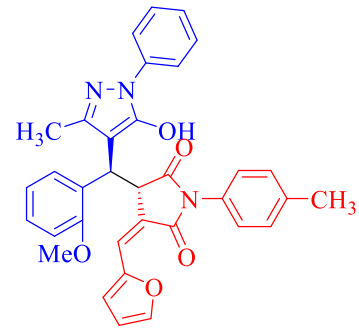

51

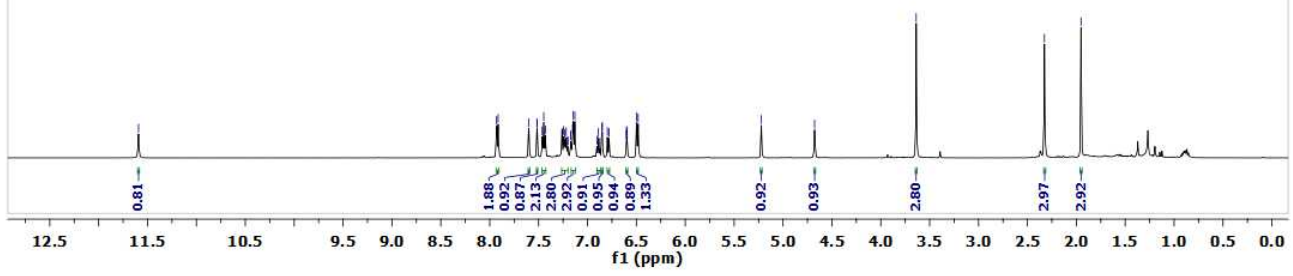

Desktop  
PD-639

180.58  
169.13  
156.73  
150.63  
150.54  
147.43  
146.49  
139.30  
139.03  
131.32  
129.70  
128.75  
128.60  
126.11  
125.47  
121.69  
120.82  
120.17  
117.61  
113.01  
100.85  
100.85

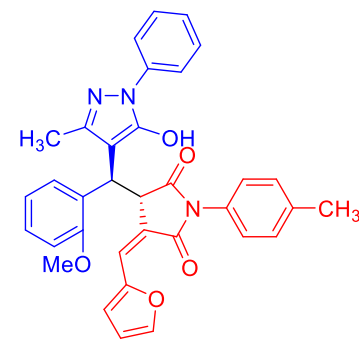

51

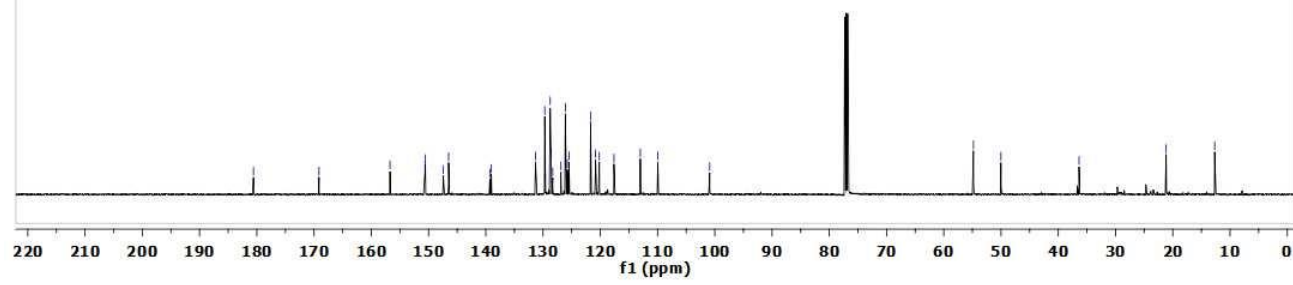

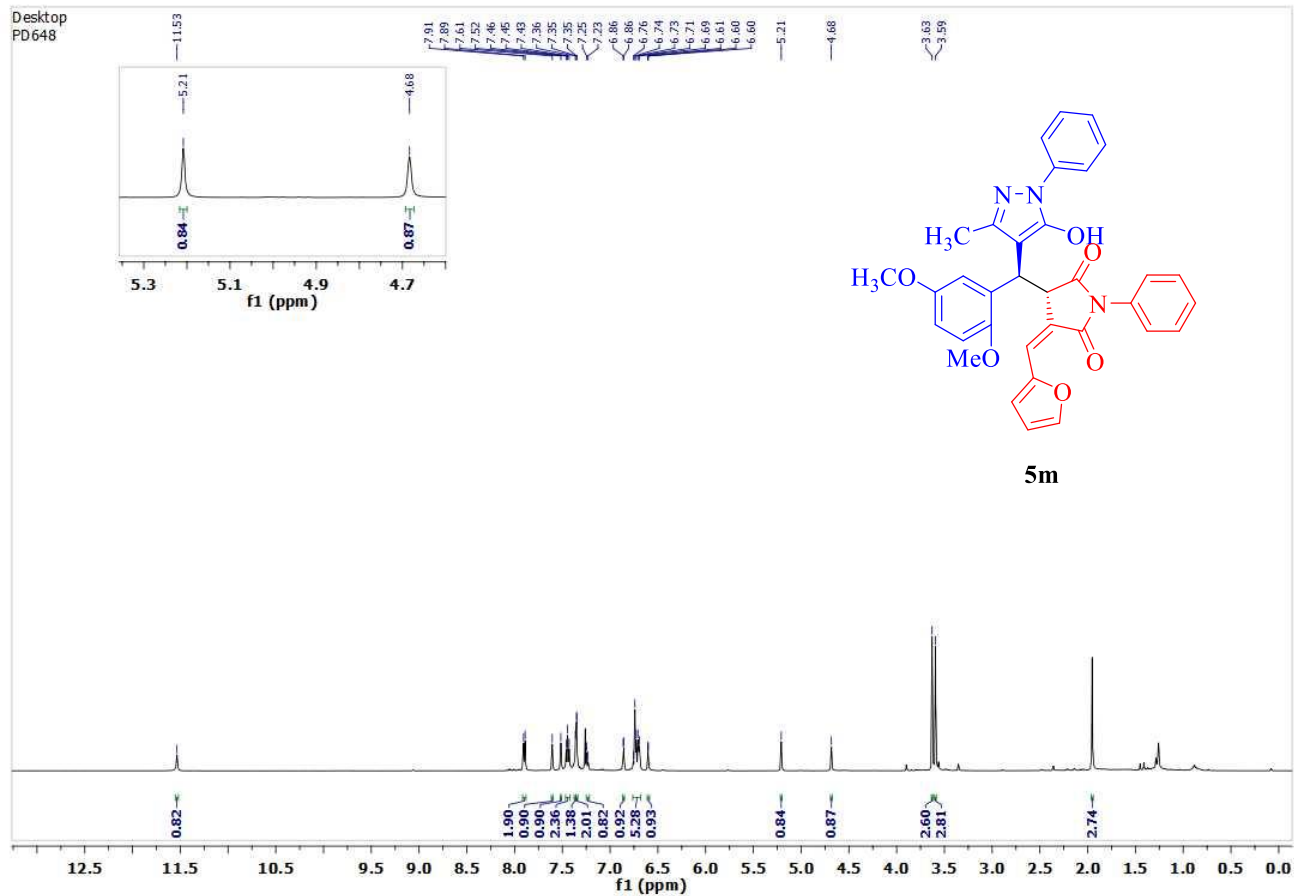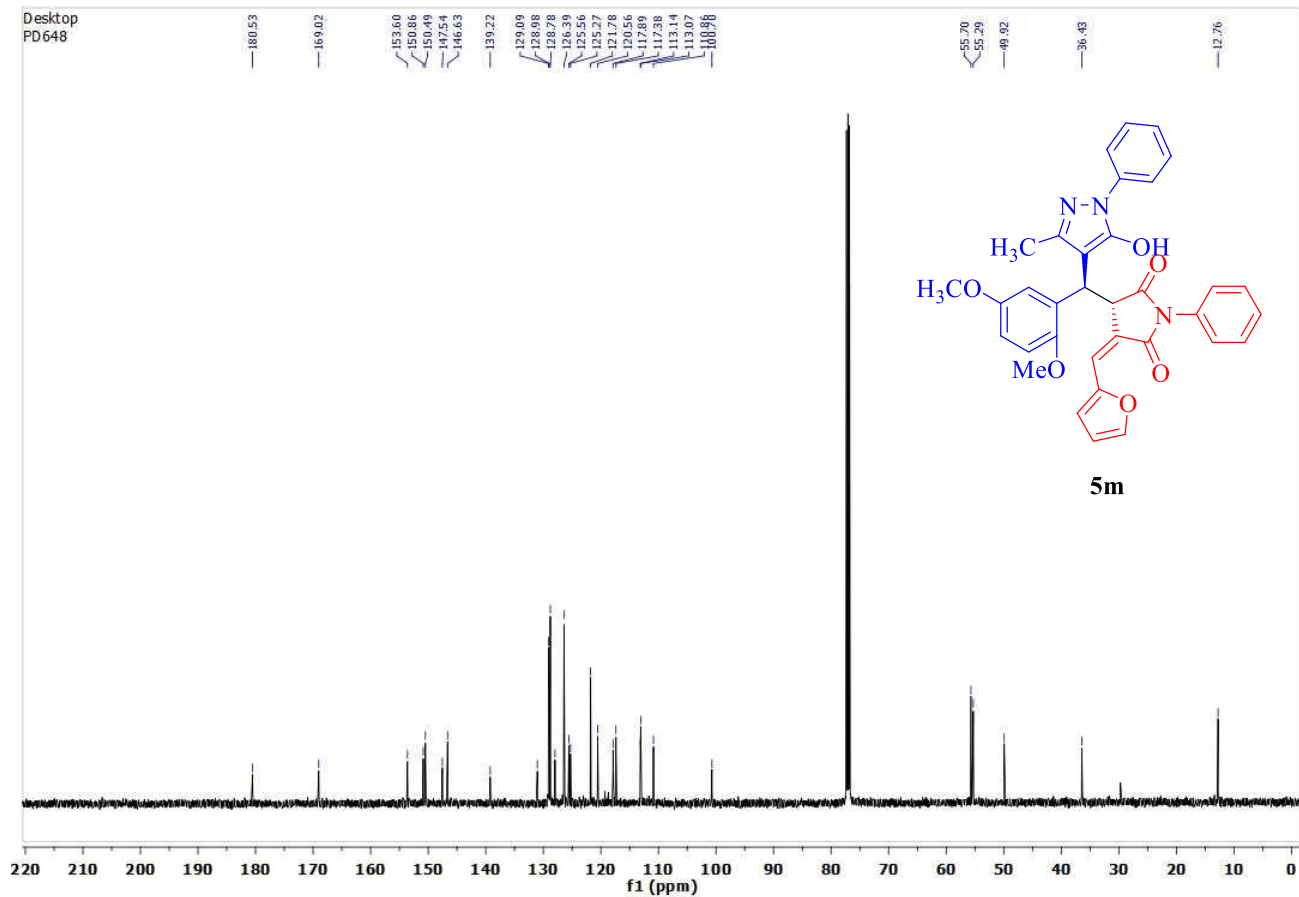

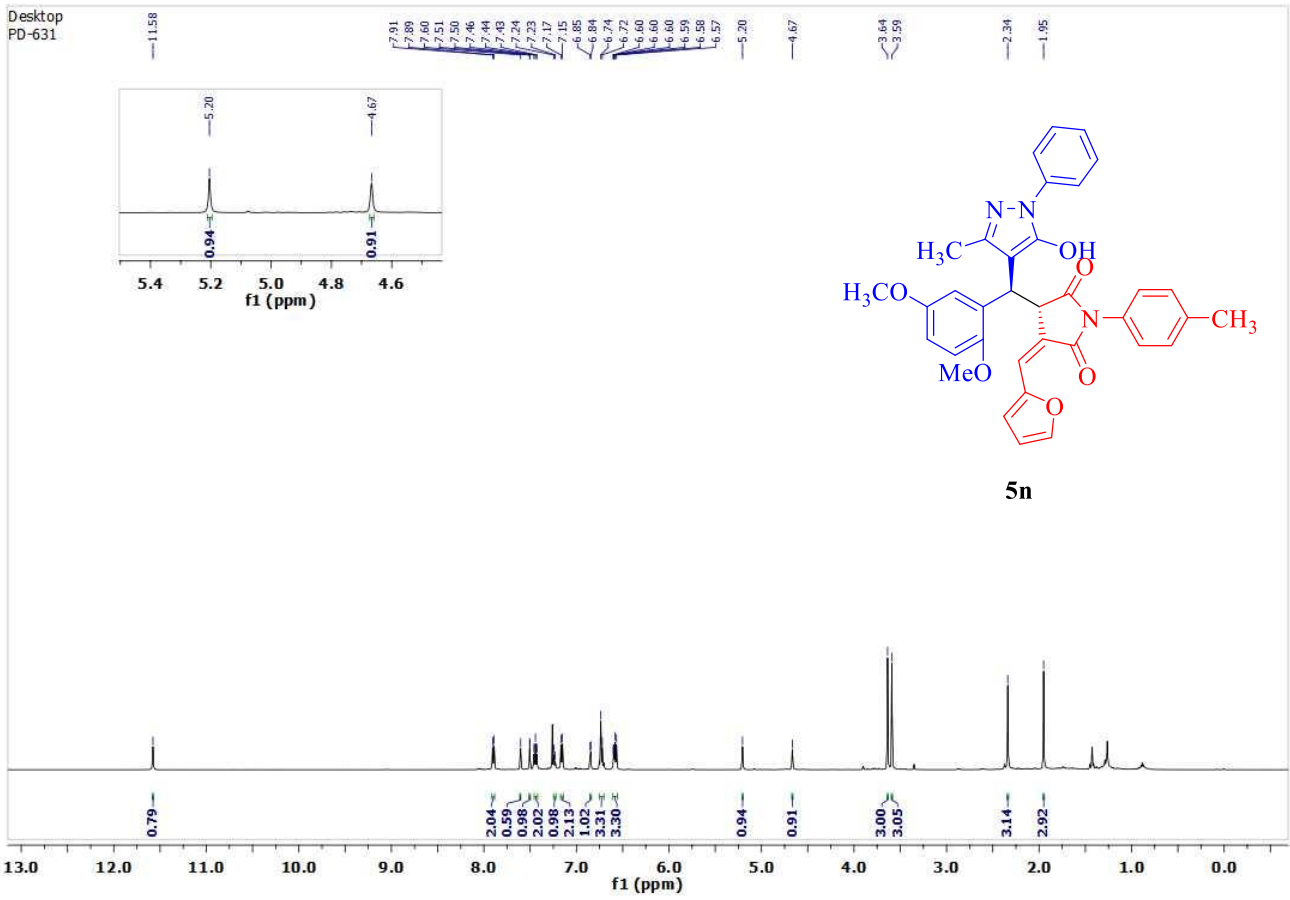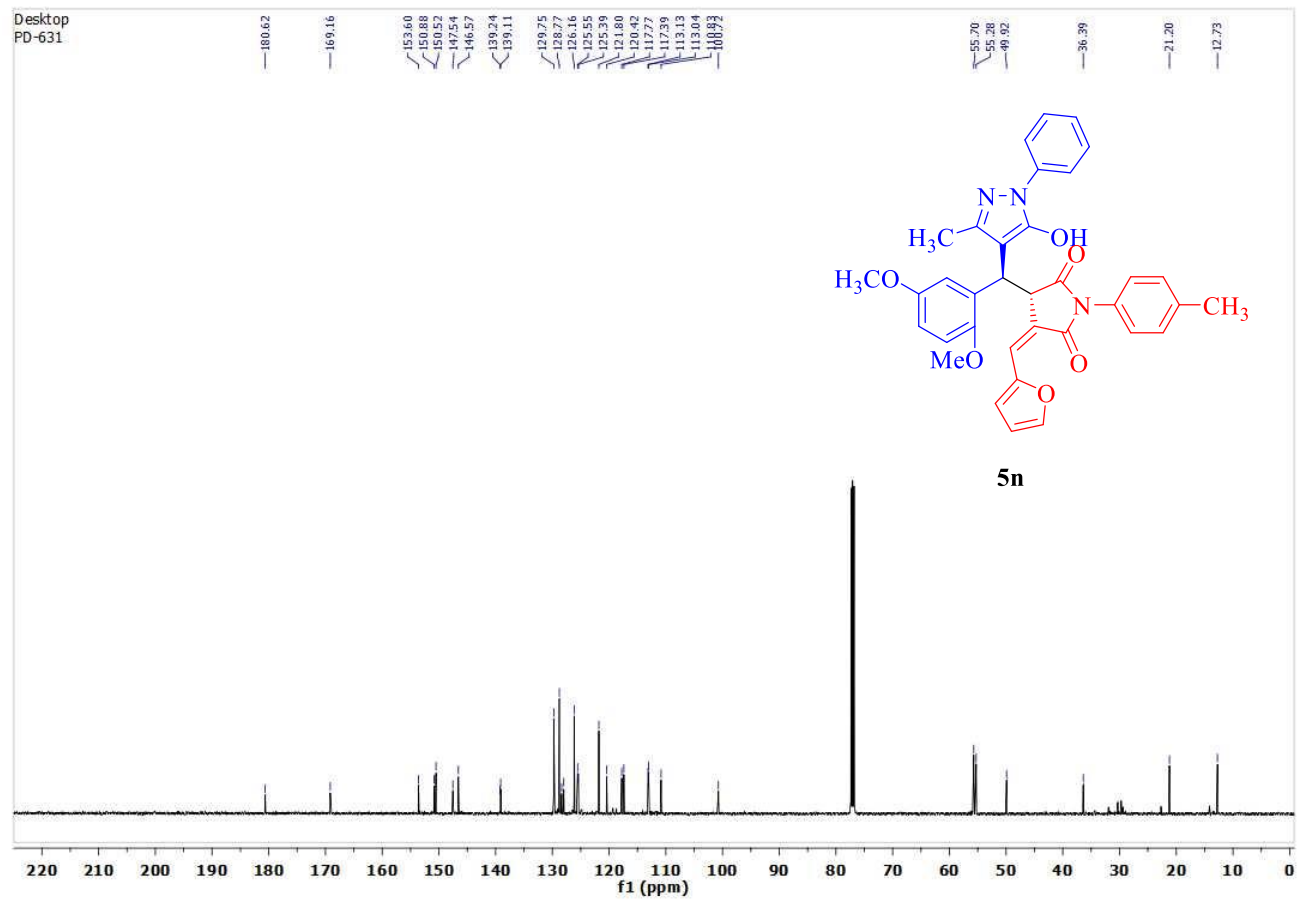



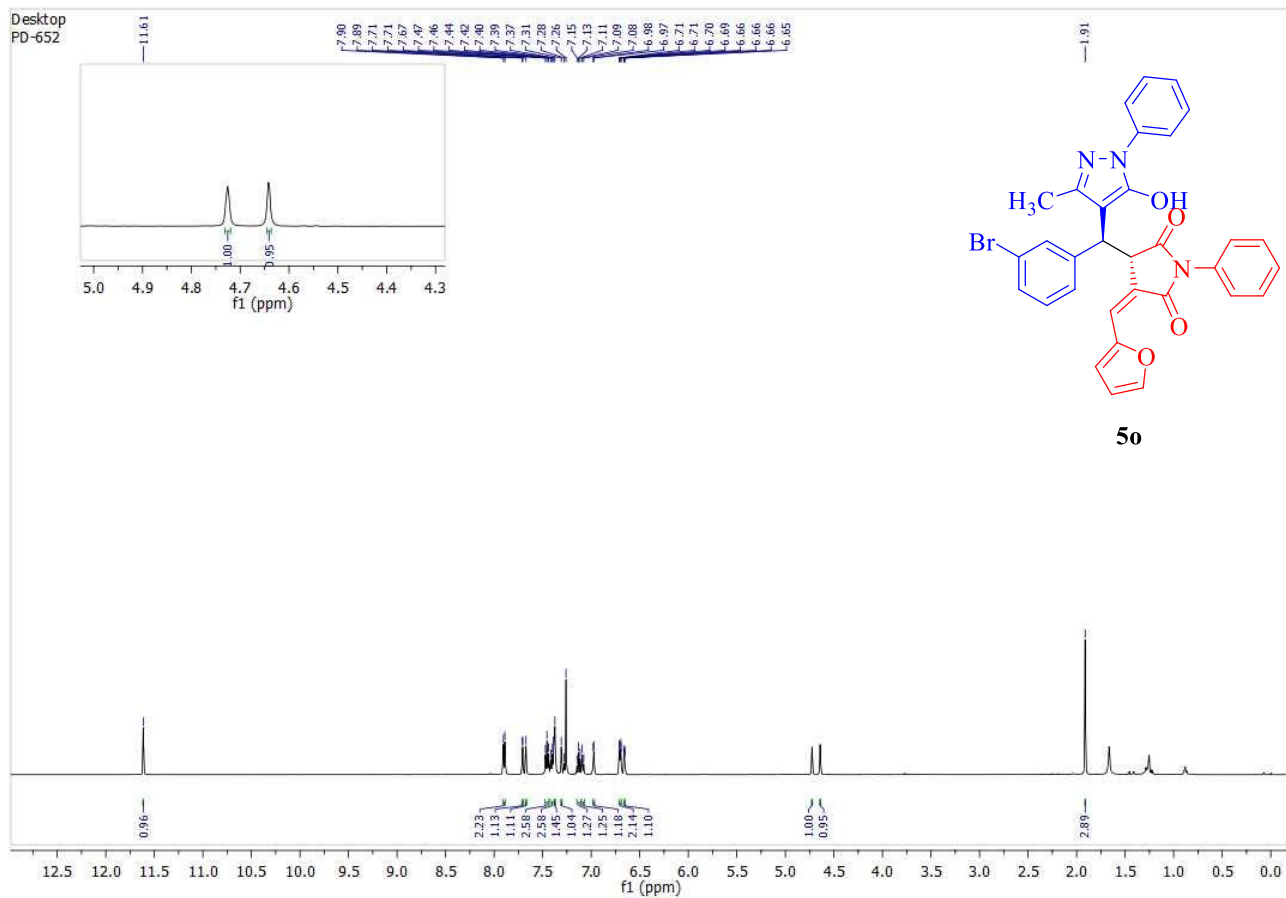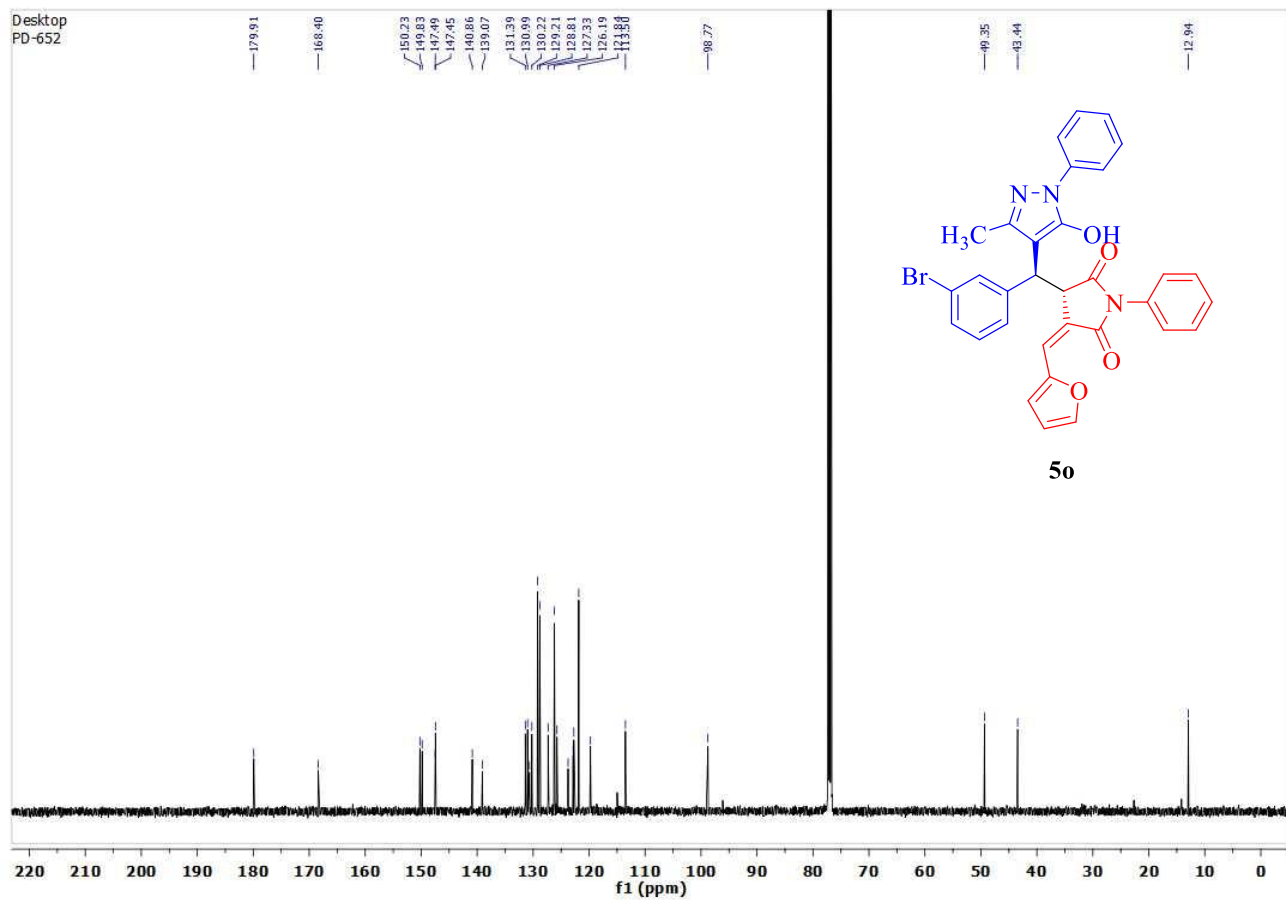

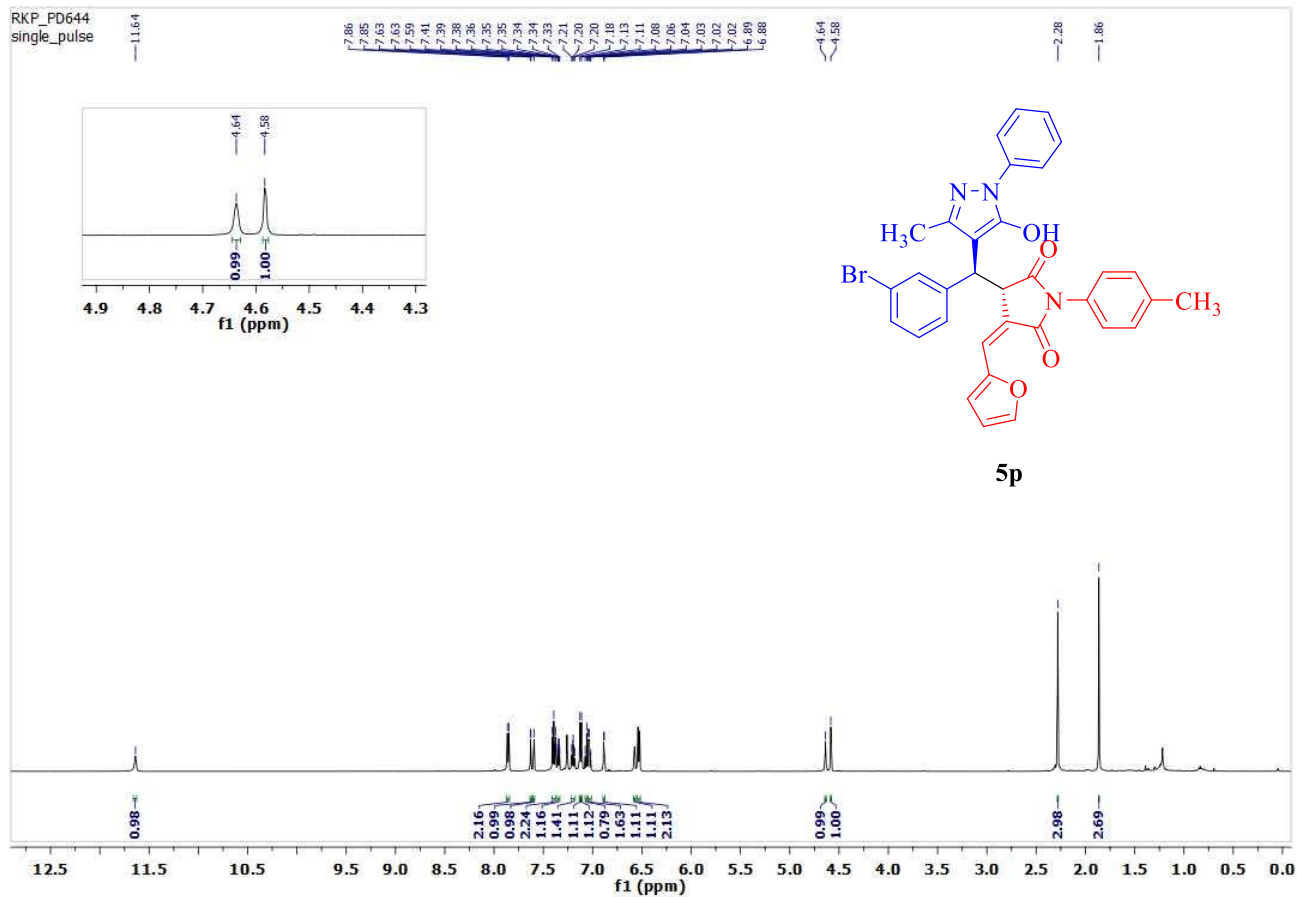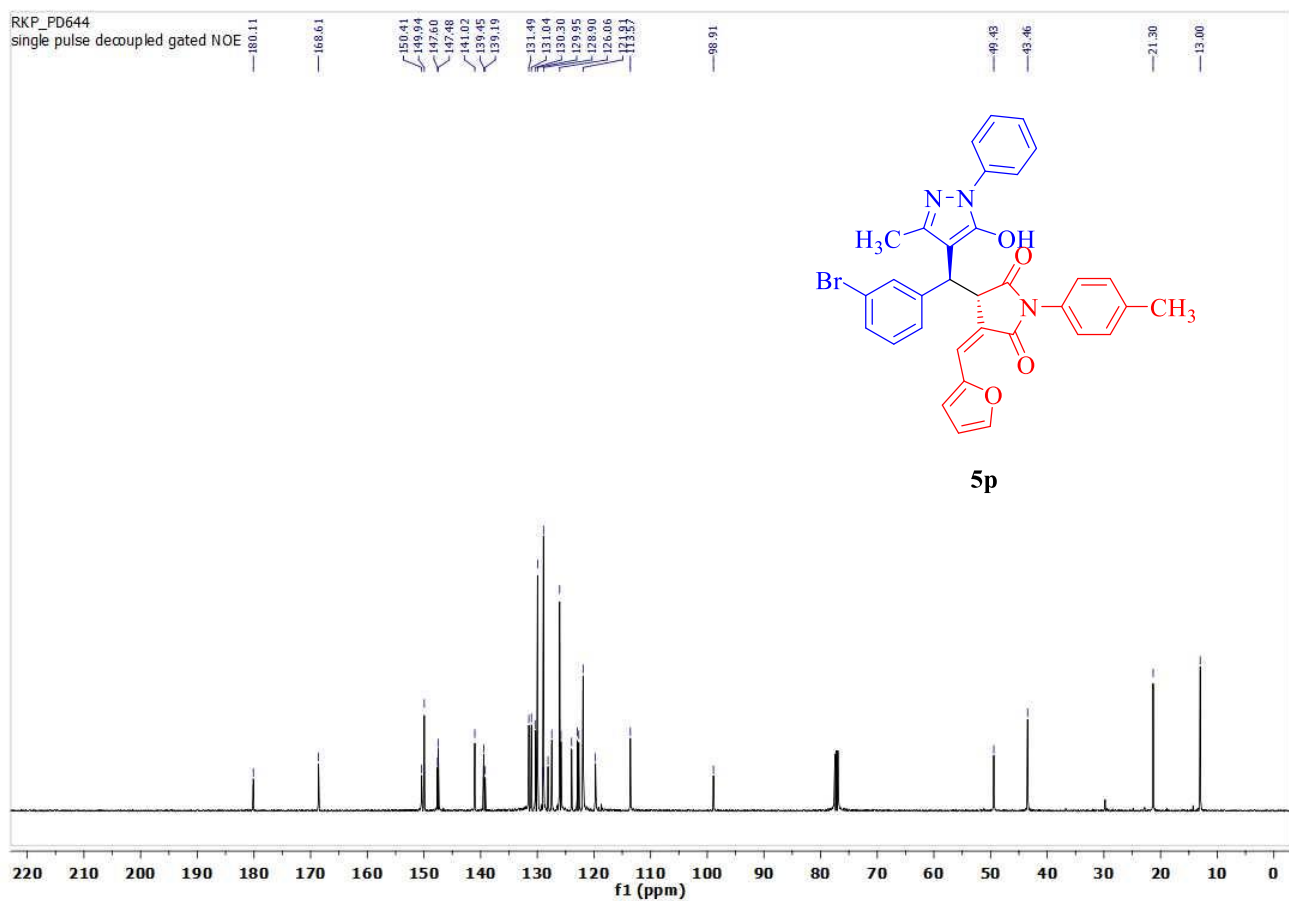

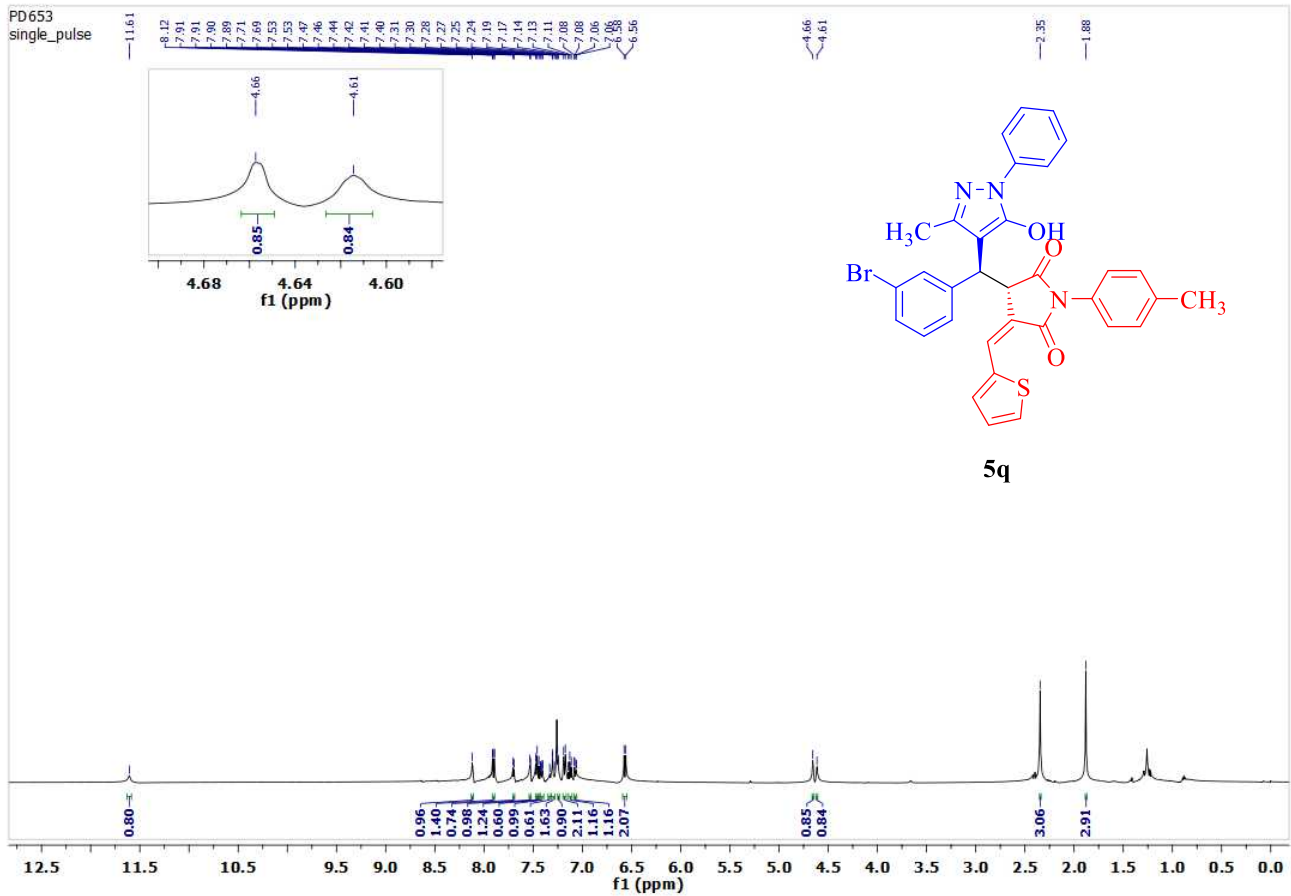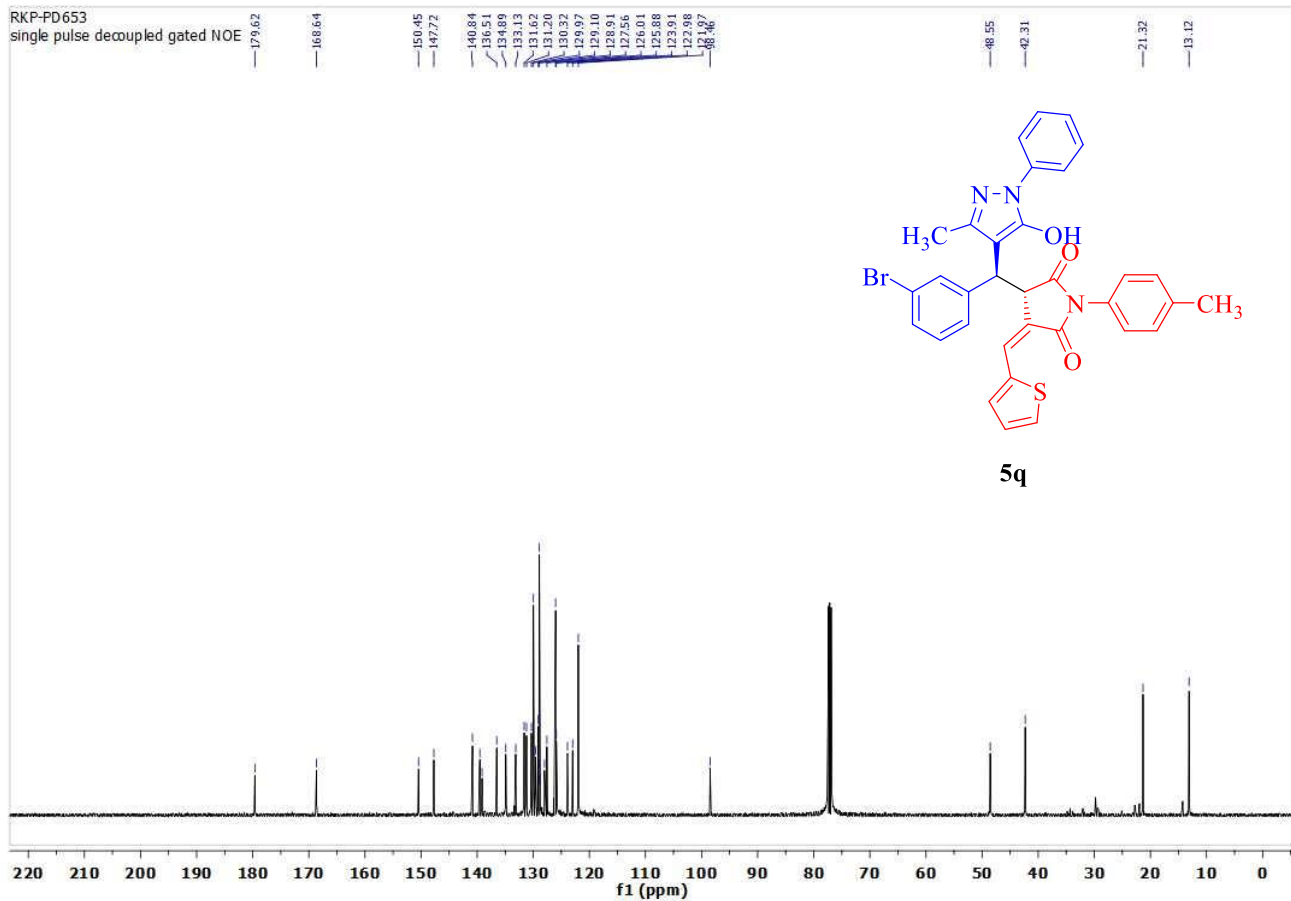

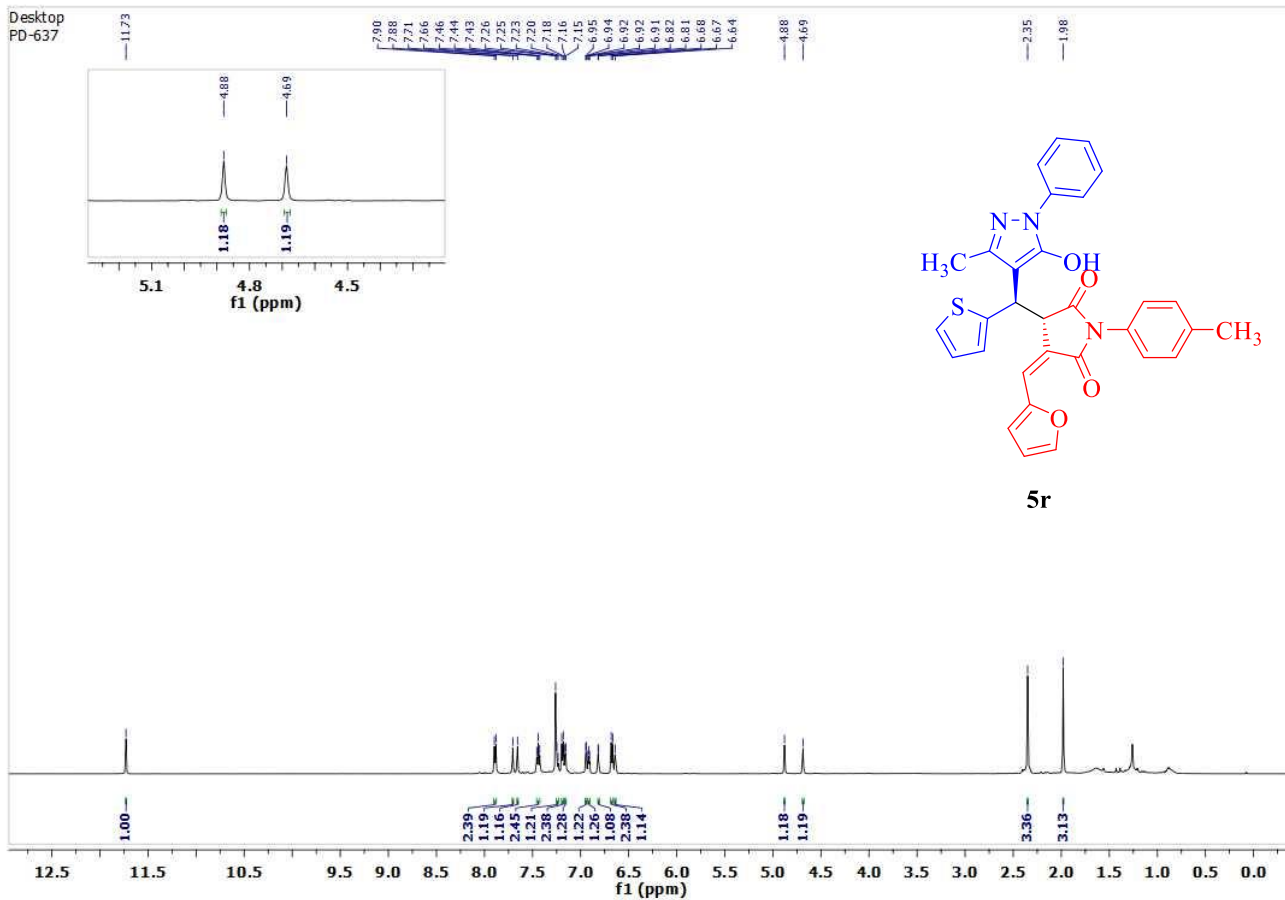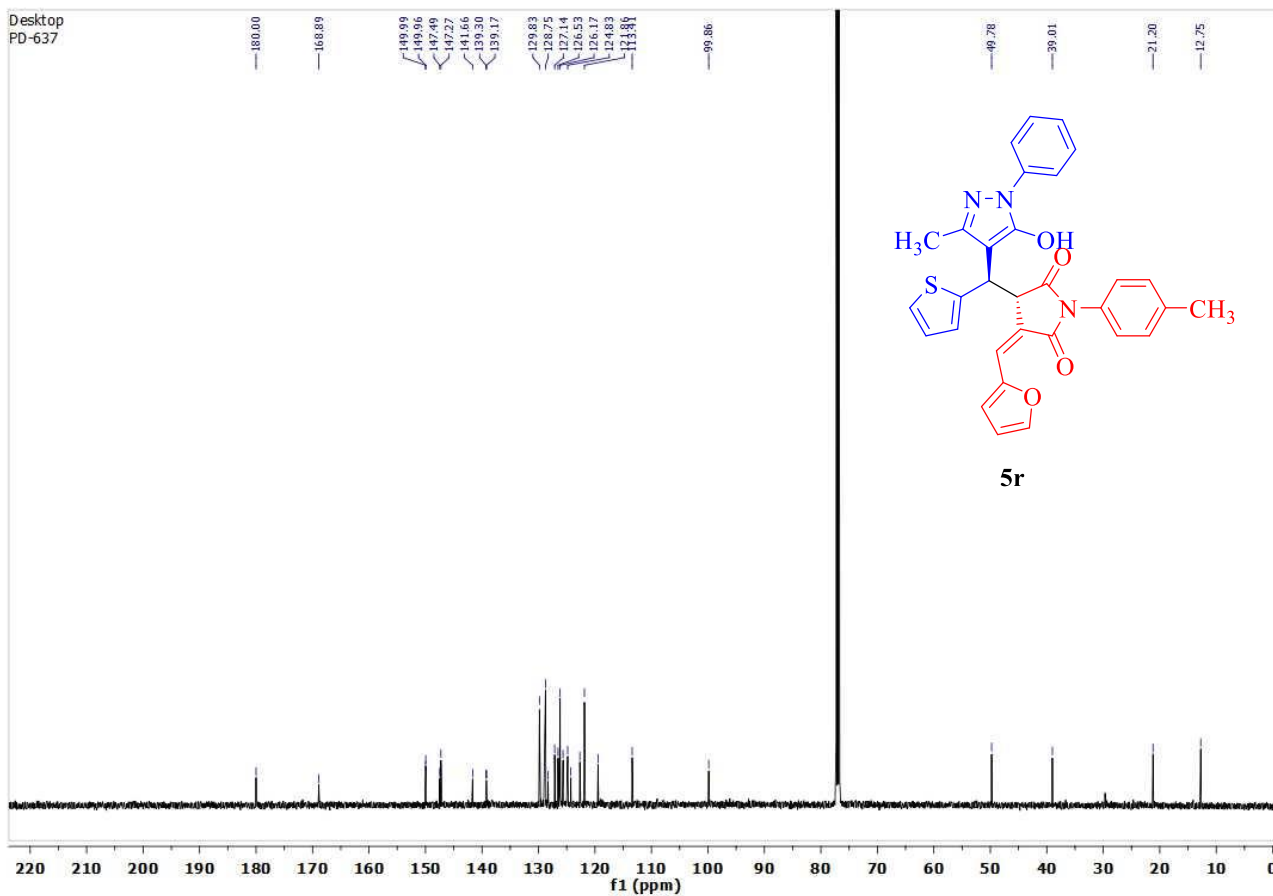

**Table S1:**  $^1\text{H}$  NMR data table for characteristic protons of **3a-3r**

| Compound  | H <sub>a</sub> | H <sub>b</sub> | H <sub>c</sub> | H <sub>d</sub> |
|-----------|----------------|----------------|----------------|----------------|
| <b>3a</b> | 4.84           | 3.99           | 4.65           | 4.55           |
| <b>3b</b> | 4.83           | 3.97           | 4.64           | 4.51           |
| <b>3c</b> | 4.81–4.78      | 3.99–3.95      | 4.58           | 4.56           |
| <b>3d</b> | 4.76           | 3.60           | 4.54           | 4.52–4.40      |
| <b>3e</b> | 4.82           | 3.98           | 4.62–4.58      | 4.55           |
| <b>3f</b> | 4.79           | 3.95           | 4.58           | 4.50           |
| <b>3g</b> | 4.75           | 3.93           | 4.54           | 4.17           |
| <b>3h</b> | 4.75           | 3.93           | 4.54           | 4.48           |
| <b>3i</b> | 4.79           | 3.93           | 4.59           | 4.46           |
| <b>3j</b> | 4.73           | 3.91           | 4.50           | 4.45           |
| <b>3k</b> | 4.76           | 4.10           | 4.58           | 4.36           |
| <b>3l</b> | 4.77           | 4.27           | 4.58           | 4.41           |
| <b>3m</b> | 4.72           | 4.08           | 4.54–4.50      | 4.37           |
| <b>3n</b> | 4.75           | 4.27           | 4.53           | 4.47–4.42      |
| <b>3o</b> | 4.74           | 4.09           | 4.54           | 4.37           |
| <b>3p</b> | 4.76           | 4.09           | 4.55           | 4.44           |
| <b>3q</b> | 4.69           | 4.06           | 4.50           | 4.35           |
| <b>3r</b> | 4.92           | 3.93–3.89      | 4.72           | 4.16           |

**Table S2:**  $^1\text{H}$  NMR data table for characteristic protons of **5a-5r**

| Compound  | H <sub>a</sub> | H <sub>b</sub> | OH    |
|-----------|----------------|----------------|-------|
| <b>5a</b> | 4.76           | 4.56           | 11.68 |
| <b>5b</b> | 5.13           | 4.71           | 11.57 |
| <b>5c</b> | 5.19           | 4.64           | 11.76 |
| <b>5d</b> | 4.96           | 4.76           | 11.53 |
| <b>5e</b> | 4.68           | 4.60           | 11.80 |
| <b>5f</b> | 5.17           | 4.65           | 11.68 |
| <b>5g</b> | 4.76           | 4.57           | 11.65 |
| <b>5h</b> | 4.70           | 4.67           | 11.70 |
| <b>5i</b> | 4.70           | 4.67           | 11.73 |
| <b>5j</b> | 4.70           | 4.61           | 11.66 |
| <b>5k</b> | 5.22           | 4.69           | 11.57 |
| <b>5l</b> | 5.22           | 4.68           | 11.59 |
| <b>5m</b> | 5.21           | 4.68           | 11.53 |
| <b>5n</b> | 5.20           | 4.67           | 11.58 |
| <b>5o</b> | 4.73           | 4.64           | 11.61 |
| <b>5p</b> | 4.64           | 4.58           | 11.64 |
| <b>5q</b> | 4.66           | 4.61           | 11.61 |
| <b>5r</b> | 4.88           | 4.69           | 11.73 |

**Note:** The chemical shift values are in ppm.

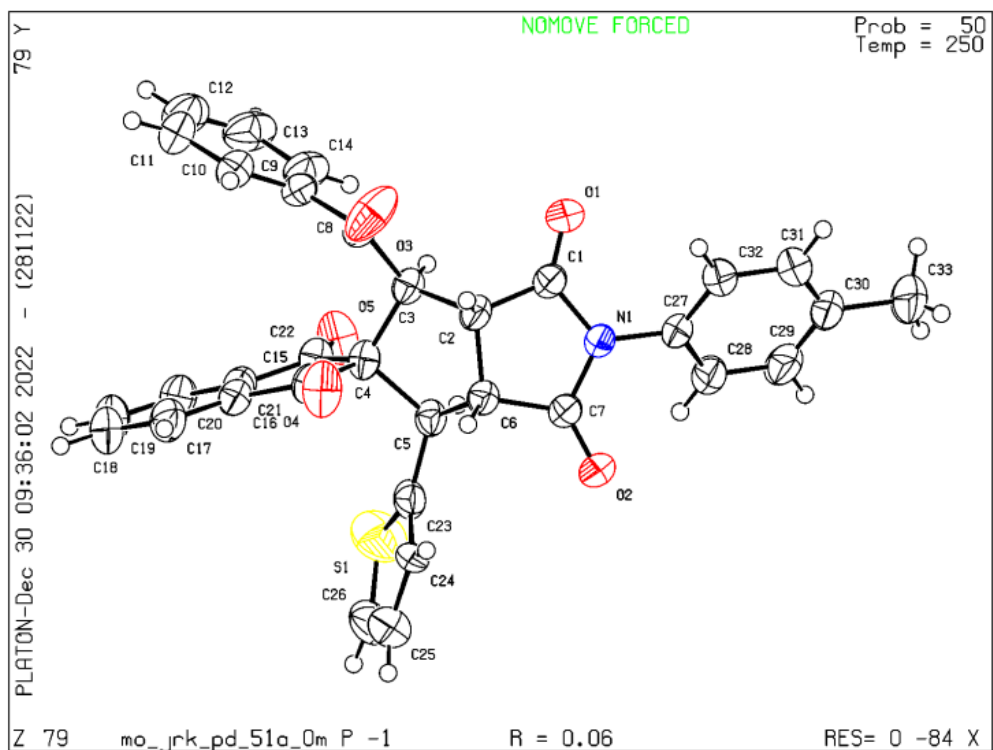

|                |                                                   |
|----------------|---------------------------------------------------|
| Formula        | C <sub>33</sub> H <sub>22</sub> NO <sub>5</sub> S |
| Formula Wt.    | 544.6010                                          |
| Crystal color  | Colorless                                         |
| Crystal system | Triclinic                                         |
| Space group    | P -1                                              |
| a(Å)           | 10.988(2)                                         |
| b(Å)           | 11.648(2)                                         |
| c(Å)           | 12.588(3)                                         |
| α(deg)         | 114.144(6)                                        |
| β(deg)         | 108.931(7)                                        |
| γ(deg)         | 92.315(7)                                         |

**Figure S9:** ORTEP plot of the crystal structure of **31**

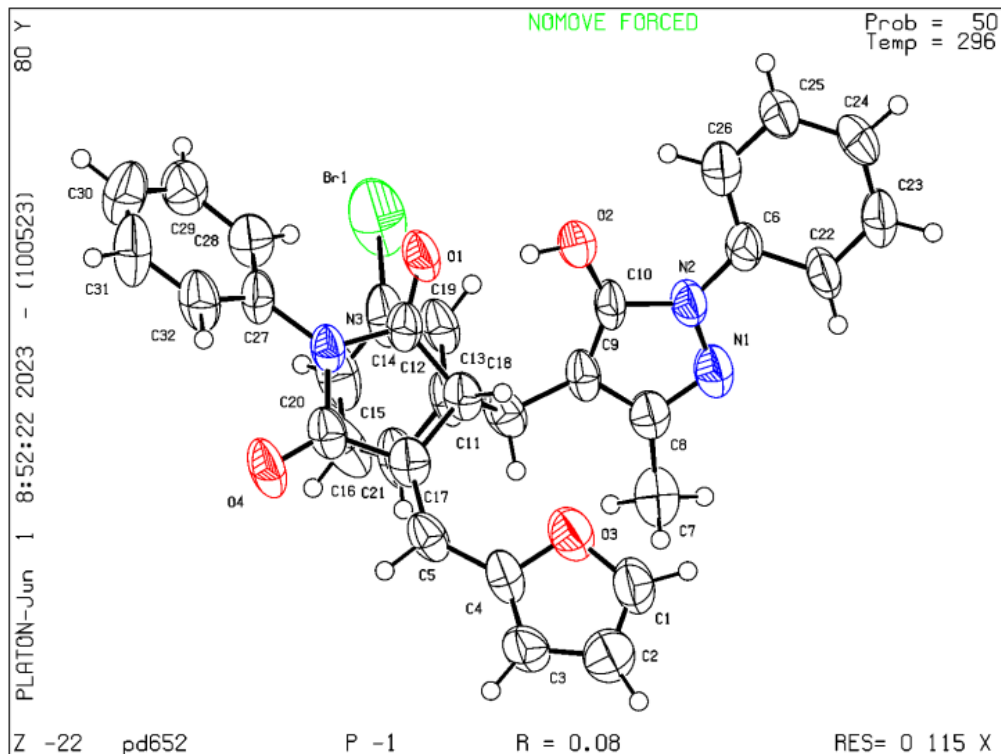

|                 |                        |
|-----------------|------------------------|
| Formula         | $C_{32}H_{24}N_3O_4Br$ |
| Formula Wt.     | 594.44                 |
| Crystal color   | Colorless              |
| Crystal system  | Triclinic              |
| Space group     | P -1                   |
| a(Å)            | 12.80(14)              |
| b(Å)            | 12.93(15)              |
| c(Å)            | 18.3(2)                |
| $\alpha$ (deg)  | 101.19(14)             |
| $\beta$ (deg)   | 94.84(15)              |
| c(deg)          | 107.4(2)               |
| $V(\text{Å}^3)$ | 2802(54)               |

**Figure S10:** ORTEP plot of the crystal structure of **5o**
